# Supplementary material for: Origin and adult renewal of the gut lacteal musculature from villus myofibroblasts
Source: bioRxiv or medRxiv preprint supplement (doi:10.1101/2023.01.19.523242), 2024-01-09
Supplement: Supplementary file [file media-1.pdf]

Supplementary Materials for

**Spatiotemporal reconstruction of the origin and assembly of smooth muscles in the  
intestinal villus**

Bhargav D. Sanketi<sup>1,†</sup>, Madhav Mantri<sup>2,†</sup>, Mohammad A. Tavallaei<sup>1</sup>, Shing Hu<sup>1</sup>, Michael F. Z.

Wang<sup>2</sup>, Iwijn De Vlaminck<sup>2,#,\*</sup>, Natasza A. Kurpios<sup>1,#,\*</sup>

\* Correspondence:

natasza.kurpios@cornell.edu (NAK), id93@cornell.edu (IDV),

**This PDF file includes:**

Materials and Methods

Figs. S1 to S6

Table S1 to S2

## **Materials and methods**

### **Sample preparation for single-cell RNA sequencing**

Timed-pregnant C57BL/6J mice were purchased from Jackson's laboratory. We collected midgut - gut tubes extending from after the stomach to the end of the protruding midgut and the attached dorsal mesentery from E12.5 and E14.5 embryos. We collected 60 midguts at E12.5 and 35 midguts at E14.5. From E16.5, E18.5, and P1.5 stages, we dissected open the small intestine extending from after the stomach to the end of the ileum and flushed it with ice-cold PBS. The mesentery of the duodenum was disposed of to prevent sampling of the pancreas. We sampled small intestines from 2 animals each for stages E16.5, E18.5, and P1.5. Samples were stored in cold PBS on ice for not more than 30 minutes before processing. When enough samples of a particular stage were collected, the tissue was cut into ~1 mm pieces and transferred into a solution of Collagenase Type 1 (200 units/ml) and Hyaluronidase (100 units/ml) under mild agitation at 37°C. 5µl of the cell suspension was plated onto a hemocytometer every 5 minutes after 20 minutes of agitation and checked for the extent of dissociation. All samples reached a near single-cell suspension by the 35 - 40-minute mark and were passed through a 40 µm filter and centrifuged into a pellet. Following that, samples were resuspended in PBS containing 0.04% bovine serum albumin. Before loading the cells on 10x Chromium, Trypan Blue-stained cells from each sample were counted on an automated cell counter to determine their viability. The samples' cell viability ranged from 83-88% after adjusting for the cell size threshold. To obtain the appropriate number of transcriptomes from viable cells (10,000 cells each for E12.5 and E14.5 stages, and 5000 each for E16.5, E18.5, and P1.5 stages), we adjusted the number of cells loaded on 10x Chromium using these cell viabilities. Sequencing libraries were prepared according to the 10x Genomics 3' scRNA-seq library preparation protocol (v3) and were then sequenced on NextSeq550 75bp kit.



## Single-cell RNA-seq data processing and visualization

Sequencing reads for scRNA-seq experiments were aligned to the mm10 mouse genome (assembly: GRCm38; release-93) to generate gene expression count matrices. The demultiplexing, barcode processing, gene counting, and aggregation were performed using the Cell Ranger software v3.1.0 (10x Genomics). Gene expression matrices were then read using Scanpy (v-1.8.1) package (78). Transcriptomes coming from more than one cell were then labeled and removed from individual scRNA-seq datasets using the scrublet (v-0.1) package (79). Cells with less than 200 unique genes and genes detected in less than 10 cells were excluded from the analysis. Cells with more than 30% mitochondrial transcripts were removed as stressed/ dying cells. After quality control filtering, we analyzed a total of 37,277 single-cell transcriptomes (E12.5: 10541 cells; E14.5: 11530; E16.5: 5227 cells; E18.5: 5271 cells; P1.5: 4708 cells) across five developmental stages. The scRNA-seq data was then normalized and highly variable genes were selected with  $\text{min\_disp}=0.5$  and  $\text{max\_mean}=3$  thresholds. We then performed mean centering and scaling while regressing out total UMI counts, percent mitochondrial UMIs, S score, and G2M score, followed by principal component analysis (PCA) to reduce the dimensions of the data to the top 30 principal components. Uniform Manifold Approximation and Projection (UMAP) and the Nearest Neighbor (NN) graph were initialized in this PCA space. The cells were then clustered using the Leiden method ( $\text{resolution}=0.5$ ). Differential gene expression analysis (DGEA) was performed using the `rank_gene_groups` function in Scanpy with the two-sided Wilcoxon statistical method. Cell-type-specific canonical gene markers along with DGEA were used to assign cell-type labels. Trajectory inference on the cell type-labeled scRNA-seq data was performed using the Partition-based graph abstraction (PAGA) method (80). PAGA map was used to initialize UMAP reductions to preserve and visualize the global topology of data at the used clustering resolutions. PAGA map was then

overlaid on UMAP using the Scanpy package for visualizing the global relationships between cell types. Normalized gene expression was visualized on DotPlots, UMAP plots, and Violin plots across cell type groups. RNA velocities for single cells were calculated and visualized with the scVelo (v-0.2.4) package (16, 81). A few cell-type clusters representing cell states of the same cell type were grouped into broad cell-type groups using cell-type-specific genes and then used for downstream analysis.

### **Subclustering and analysis of intestinal mesenchymal cells and mesenchymal fibroblast cells**

Normalized gene expression for all mesenchymal cell types was extracted from the combined scRNA-seq dataset. We used Scanpy to reselect the highly variable genes within that cell type group with  $\text{min\_disp} = 0.5$  and  $\text{max\_mean} = 3$  thresholds. We then performed mean centering and scaling while regressing out total UMI counts, percent mitochondrial transcripts, S score, and G2M score, followed by principal component analysis (PCA) to reduce the dimensions of the data to the top 30 principal components (PCs). Uniform Manifold Approximation and Projection (UMAP) and the Nearest Neighbor (NN) graph were initialized in this PCA space using the first 20 PCs. The cells were then reclustered using the Leiden method (resolution = 0.5) to get mesenchymal cell-type clusters. Clusters expressing colon-specific genes such as *Hoxd9*, *Hoxa9*, *Colec10*, and *Adamdec1* were excluded from the analysis. The remaining mesenchymal cells were reprocessed and clustered (resolution = 0.7) to update the mesenchymal cell type clusters. Cell-type-specific canonical gene markers along with DGEA were used to assign cell-type labels. Trajectory inference on the cell type-labeled mesenchymal scRNA-seq data was performed using the Partition-based graph abstraction (PAGA) method. PAGA graph was used to initialize UMAP reductions to preserve and visualize the global topology of data at the used clustering resolutions. PAGA map was then overlaid on UMAP using the Scanpy package for visualizing the global

relationships between mesenchymal cell types. Normalized gene expression for differentially expressed genes and genes of interest was visualized on DotPlots and UMAP plots across cell-type subgroups. Normalized gene expression for the fibroblast clusters was extracted from the small intestinal mesenchymal scRNA-seq dataset. Fibroblast cells were then preprocessed and clustered (resolution = 0.4) to derive fibroblast subtype clusters. DGEA was used to assign fibroblast subtype labels.

### **Animal Models**

Rosa26 CAG-tdTomato (JAX stock #007905) (41), Pdgfra CreERT2 (JAX stock #032770) (40), Tnc CreERT2 (a gift from C. M. Hao) (55), Hoxb6 Cre (JAX stock #017981) (67), Prox1 CreERT2 (JAX stock #022075) (68), Notch3 flox (a gift from J. Kitajewski and N. Adler) (65), Dll4 flox (66), Prox1-GFP (RRID:MMRRC\_031006-UCD) (64) mice were previously described. All were maintained in Cornell university's pathogen-free barrier facility and were kept on a 12-hour light/dark cycle, with free access to standard chow pellets (Envigo) and water. All the mice used for mating were 2-6 months of age. Dams and studs were housed separately before timed mating. To track pregnancy progression, timed mated breeding pairs were checked every morning and separated upon finding a vaginal plug, staged as E 0.25. Post-natal stages are defined upon birth as P0. Sex was not taken into experimental consideration for embryonic stages and postnatal stages until P9. Only female mice were collected at stages beyond P9. Tail and toe snips collected from embryonic and postnatal mice respectively were used for genotyping by PCR amplification. For direct comparison, littermates of different genotypes were sorted into the same procedure. All animal experiments adhered to the guidelines of the Institutional Animal Care and Use Committee of Cornell University and were conducted within the scope of an approved animal protocol.

Cornell University operates its animal care and uses program under the Animal Welfare Assurance on file with the Office of Laboratory Animal Welfare.

### **Induction of Cre recombinase activity**

Cre recombinase was activated to induce lineage tracing and gene knockout by intraperitoneal injection of tamoxifen (Sigma Aldrich, 45T5648) or 4-hydroxytamoxifen (4OHT) (Sigma Aldrich, H6278), the active metabolite of tamoxifen in peanut oil (Sigma, P2144), except for P0 pups where intragastric injections were performed (82). *Pdgfra CreERT2* and *Prox1 CreERT2* expressing strains were induced with a single dose of 30 mg/kg of 4OHT. This strategy was chosen as it resulted in visibly saturated reporter expression in crypt and villus mesenchymal cells and lacteals respectively and did not produce developmental defects in the WT and Cre<sup>+</sup> mice induced in the prescribed intervals. 4OHT was suitable for this induction since *Pdgfra* and *Prox1* are genes constitutively expressed by villus fibroblast-like cells and lacteals respectively. *Tnc CreERT2* expressing strains were induced with a single dose of 100 mg/kg of tamoxifen. Tamoxifen was preferred to 4OHT since it allowed targeting of cells that express *Tnc* over a broader window to be labeled and did not produce developmental defects in the WT and Cre<sup>+</sup> mice induced in the prescribed intervals. Using 4OHT to induce *Tnc CreERT2* resulted in sparse reporter labeling and variability in labeling between replicate induction experiments.

### **Mouse tissue collection, staining procedures, and image acquisition**

Whole-mount and section immunostaining of embryonic, perinatal, and adult intestinal tissue was adapted from previously described protocols (24, 83, 84). Briefly, the first jejunal loop was dissected from mice of specified stage and genotype in ice-cold 1X PBS, immediately followed by PBS washes and fixed overnight at 4°C in 4% paraformaldehyde (PFA)/PBS or into ice-cold

100% MeOH - suitable for detecting SMA<sup>low</sup> cells and removing the fluorescence from endogenous reporters. Tissues fixed in PFA were washed into PBS and stored at 4°C up to a week before whole-mount immunostaining or processed for cryosectioning by dehydrating in a gradient of sucrose/PBS solutions, embedded in OCT Compound (Tissue-Tek), and stored in -80°C until sectioning. Tissues that were fixed in 100% MeOH were stored at -20°C and rehydrated into PBS with 0.1% Tween-20 before whole-mount immunostaining or being processed for cryosectioning as described above. All frozen sections were 15 µm thick. For immunostaining frozen sections, antigen retrieval was performed with a citrate-based antigen unmasking solution. Sections were then permeabilized with 0.1% Triton X-100 in PBS for 30 min, blocked in 3% BSA in PBS for 2 hours at room temperature, and incubated with primary antibodies diluted in blocking solution for 12-16 hours at 4°C. Sections were then washed and incubated with appropriate secondary antibodies (Invitrogen, 1:500) and DAPI (Invitrogen P36930, 1:1000, nuclear label) at room temperature for 1 hour. Samples were mounted in ProLong Gold Antifade Mountant (Thermo Fisher, P36930), and stored in the dark until imaging. For whole-mount immunostaining, tissues were blocked in 3% BSA, serum, and 0.3% Triton X-100 in PBS at 4°C for 12-16 hours, then incubated with primary antibodies 24-48 hours at 4°C. After washing for 6 hours in PBS with 0.3% Triton X-100 at room temperature, changing the wash every 30 mins, tissues were incubated in secondary antibody (1:500) for 12-16 hours at 4°C. Tissues were once again washed for 6 hours in PBS with 0.3% Triton X-100 at room temperature, changing the wash every 30 mins, and then post-fixed in 4% PFA for 12-16 hours at 4°C. Tissues were washed into PBS, sliced into 100-200 µm thick layers, and mounted with ProLong Gold Antifade Mountant. The following primary antibodies were used at a 1:100 dilution unless specified otherwise: SMA-FITC (Sigma, F3777), SMA-Cy3 (Sigma, C6198), PDGFR $\alpha$  (BD Biosciences, 558774), TNC (R&D, MAB2138), E-

CAD (Invitrogen, 14324980), FOXP2 (1:250, Abcam, ab16046), NOTCH3 (Abcam, ab23426), DLL4 (R&D, AF1389), LYVE1 (Abcam, ab14917), NRP2 (R&D, AF567), HEY2 (Proteintech, 10597), MCAM (Abcam, ab75769), RFP (Rockland, 600401379). Mounted samples were imaged on a Zeiss LSM 710 (Inverted Axio Observer.Z1) confocal microscope using 25x and 63x lenses. To capture the entire villi, multiple adjacent fields of view were stitched together on the Zeiss Zen platform before exporting images for further analysis. Image processing, confocal image stacking, and quantifications were performed using FIJI and Imaris 9.5.

### **Statistical quantification**

We quantified the contribution of *Pdgfra* and *Tnc* lineage to villus SM formation from confocal z-stacks of villi taken at 1 $\mu$ m intervals, blinded to the genotype and stage of the images. Quantifications were made for ~15 villi from each biological replicate, with 3 biological replicates being analyzed for each lineage tracing induction interval (P0-P9, P9-P18, P18-P27). Individual villus SM fibers from each villus were analyzed for the presence of any tdTomato<sup>+</sup> labeling colocalizing with SMA<sup>high</sup> expression. The contribution was calculated as the ratio of SMA<sup>high</sup> fibers with at least one tdTomato<sup>+</sup> cell to the total number of SMA<sup>high</sup> fibers counted. Statistical analyses and graphical plotting were performed in GraphPad Prism 8 (La Jolla, CA). Comparison between different lineage tracing induction intervals was tested with one-way ANOVA and multiple comparisons with Tukey's correction. Data were expressed as the mean of the means from each biological replicate  $\pm$  standard error of the mean (SEM).

We quantified the structural changes in the villus muscular-lacteal upon inducible knockout of *Notch3* and *Dll4* from maximum intensity projections of confocal z-stacks on FIJI, blinded to the genotype of the images. Quantifications were made for 25 villi from each biological replicate, with 3 biological replicates analyzed for each of the genotypes. Lacteal lengths were measured as to the

highest LYVE<sup>+</sup> cell, not considering any filopodia that might be projecting from it. Villus SM lengths were measured as the highest point reached by a SMA<sup>high</sup> fiber in a particular villus, not considering the status of other fibers in the same villus. Lacteals, villus SM, and villus lengths were consistently measured for each villus and used for internal normalizations. Statistical analyses and graphical plotting were performed in GraphPad Prism 8 (La Jolla, CA). The spread of normalized measurements from each biological replicate was visualized as violin plots. Normalized values were sorted into bins and the data were plotted as the mean of the percentage fraction of values that fit into each bin on all the biological replicates. Cell protrusion longer than or equal to 6  $\mu\text{m}$  was defined as lacteal filopodia for analysis. Comparison between genotypes was performed by two-way ANOVA with Šídák's correction or unpaired, two-tailed Student's t-test. Data were expressed as the mean of the means from each biological replicate  $\pm$  standard error of the mean (SEM).

## Supplementary figure legends

**Figure S1: Single-cell RNA-seq analysis of developing mouse intestine at four embryonic and one postnatal stage of development.** **(A)** The number of unique genes detected per cell (left), number of unique transcripts per cell (center), and percentage of mitochondrial transcripts (right) in intestinal scRNA-seq datasets from five developmental stages. **(B)** Bar plot showing the number of viable intestinal cell transcriptomes captured in scRNA-seq experiments. **(C)** Dendrogram showing hierarchical clustering of single-cell transcriptomes from intestinal cell types across five developmental stages. **(D)** Pie chart showing the fraction of UMIs mapping to spliced and unspliced transcripts (left) and stacked bar plot showing changes in the fraction of spliced and unspliced molecules across mouse development stages (right). **(E)** Bar plot showing the proportion of cells from cell types in gut epithelium lineage across developmental stages. **(F)** Bar plot showing the proportion of cells from cell types in gut vasculature lineage across developmental stages.



Fig. S1

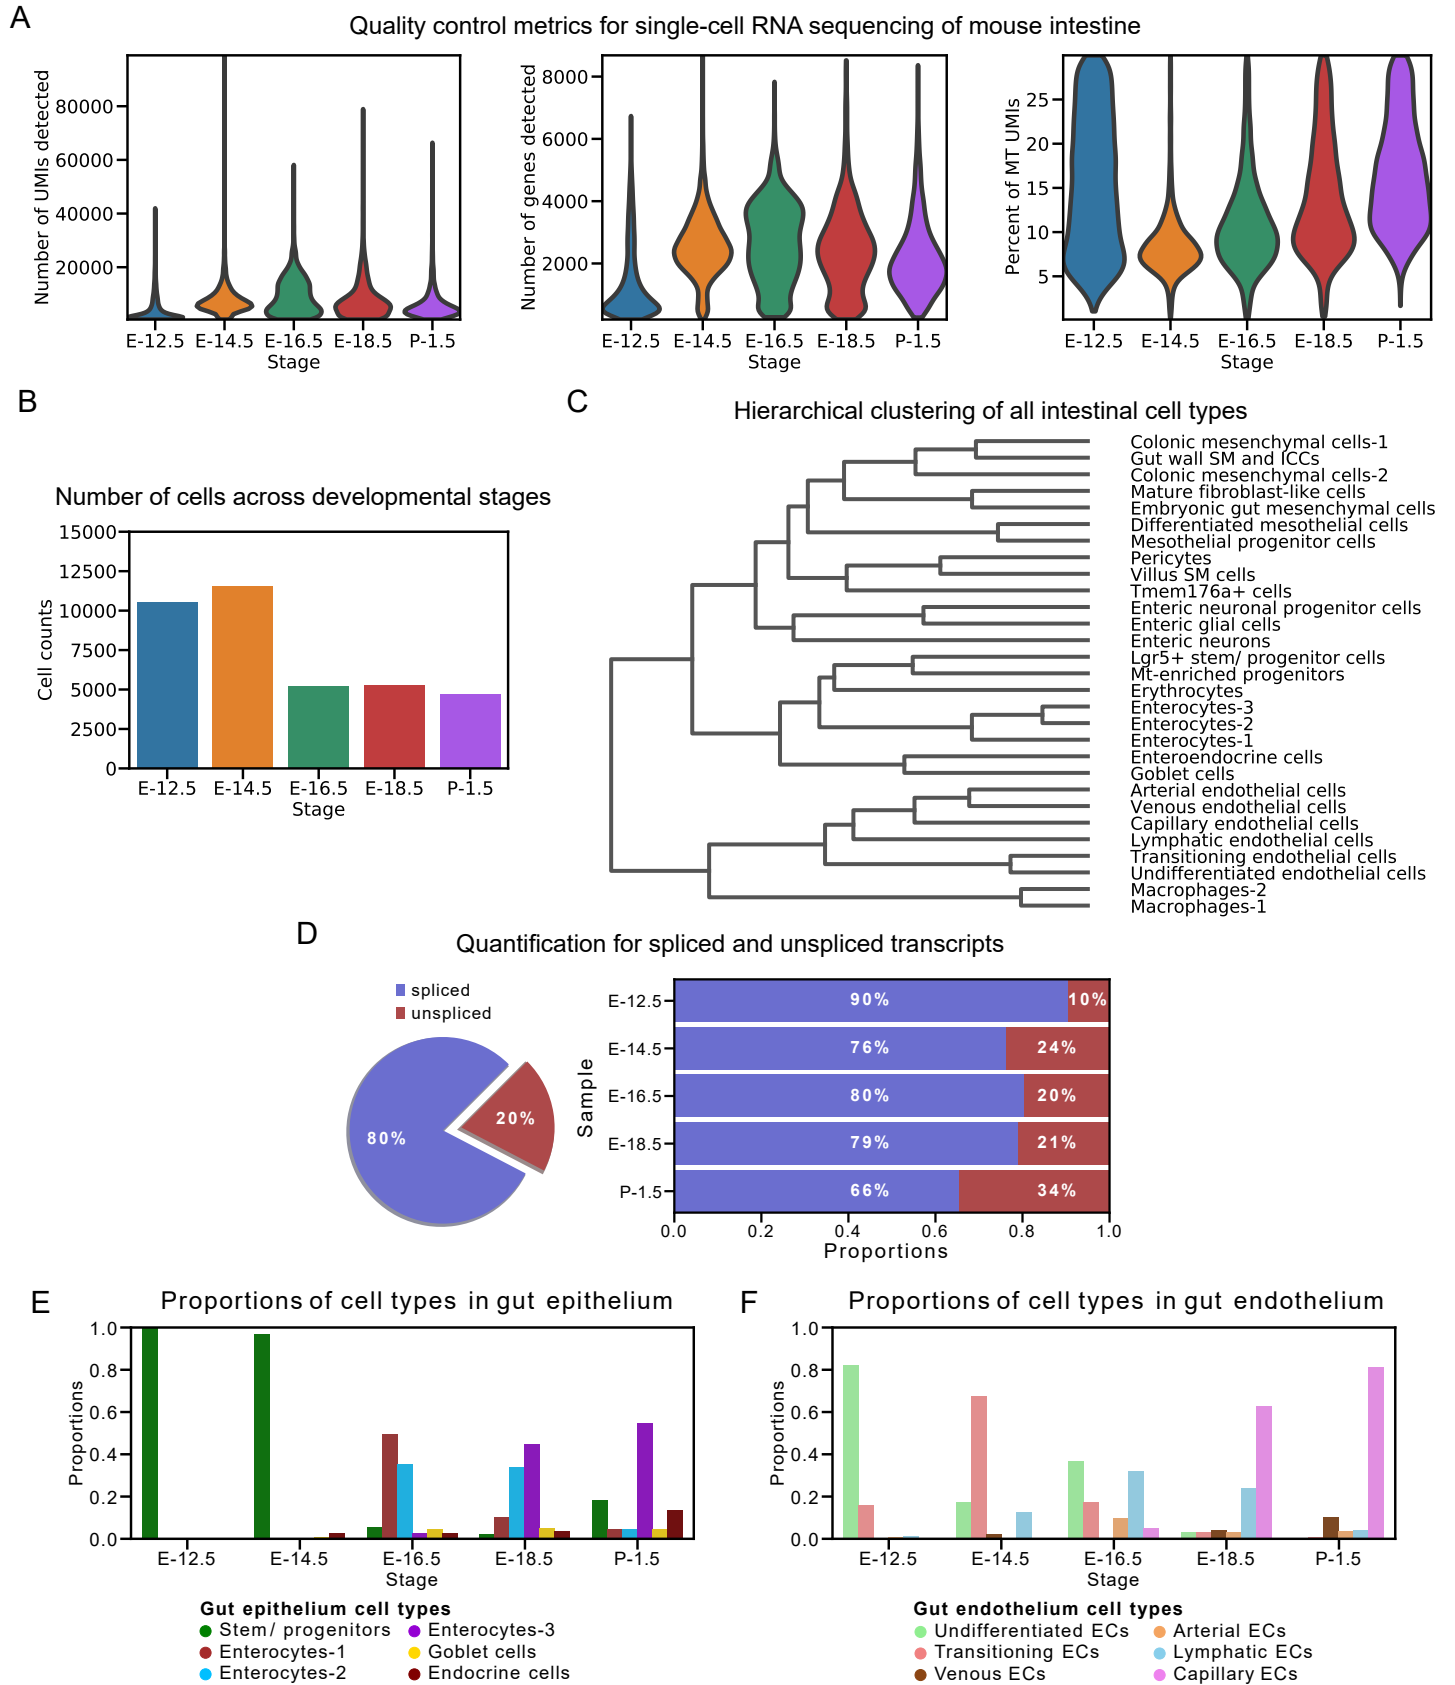

**Figure S2: Single-cell RNA-seq analysis of mouse intestinal mesenchymal cells across development.** (A) UMAP plot of 9,445 single-cell transcriptomes from gut musculature at embryonic stages (E12.5, E14.5, E16.5, and E18.5) and one postnatal stage (P1.5), clustered by gene expression and colored by cluster labels. (B) UMAP plots showing mouse development stages for the gut musculature scRNA-seq data. (C) UMAP plot showing the expression of colon tissue-specific gene markers in the gut musculature scRNA-seq data. (D) Dot plot showing the differential gene expression analysis results for mesenchymal cell types in the small intestine. Cell type labels based on UMAP in Fig. 2A. (E) Heatmap showing the differential gene expression analysis results for three distinct smooth muscle clusters in the small intestinal scRNA-seq data.

Fig. S2

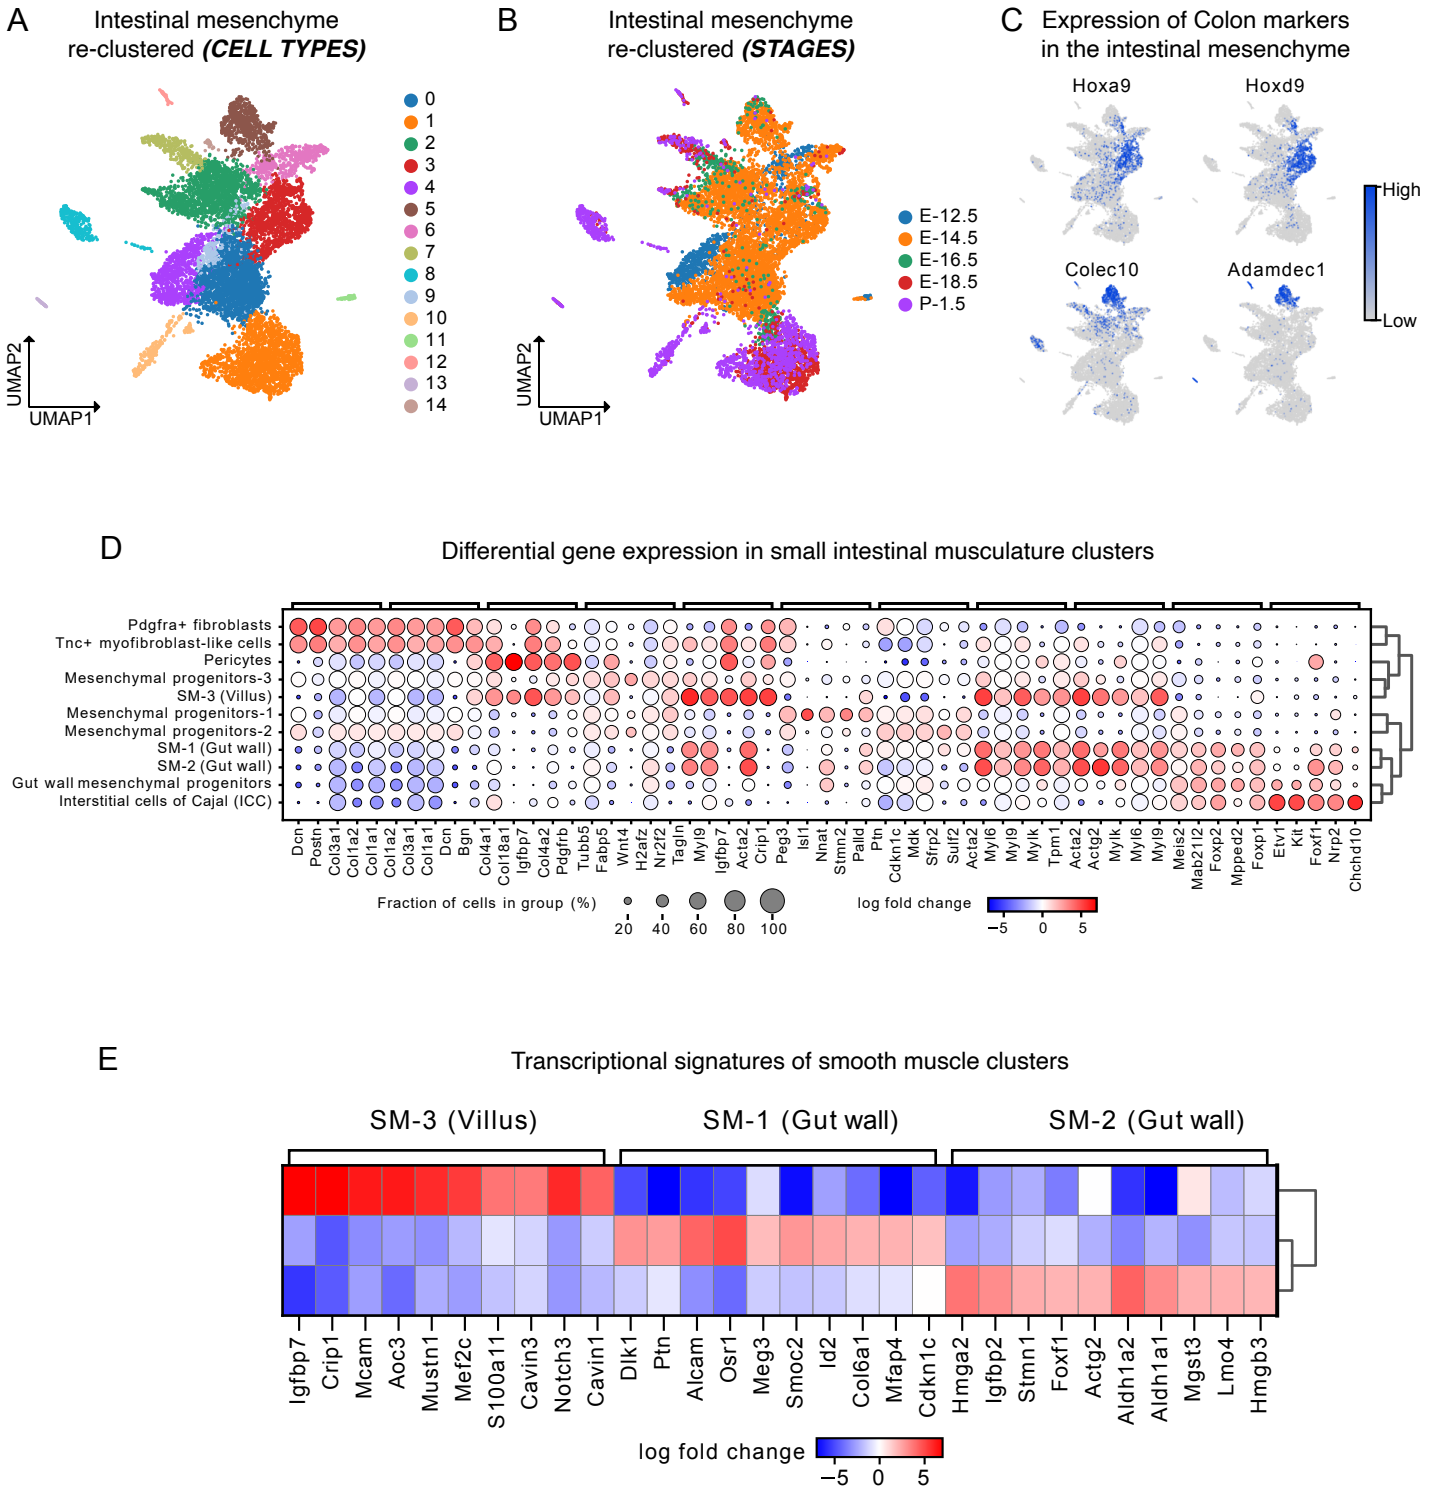

**Figure S3: Expression of NRP2 and PDGFR $\alpha$  in the developing gut.** (A) UMAP showing *Nrp2* expression in the scRNA-seq trajectories of the small intestinal musculature and immunofluorescent staining jejunal villi sections. NRP2 expression (on cell membrane) is specific to the outer gut wall and mucosal lymphatic endothelium - colocalized with *Prox1*-GFP reporter (intracellular) and LYVE1 (on cell membrane). (B) The left image of both E18.5 and P9 panels shows wholemount immunostaining of jejunal villi epithelium with E-CAD (on cell membrane) and mesenchyme with PDGFR $\alpha$  (on cell membrane), whereas the rest of the images show a single 1 $\mu$ m section along the z stack. PDGFR $\alpha$  is expressed in the aggregated mesenchymal cells of the villus tip and a sub-epithelial lining of cells in the villus. (C) Scatter plots showing coexpression of *Pdgfra* with SM markers *Acta2* and *Myh11* in cells from the *muscularis mucosa*. Cell type labels are based on Fig. 2, A and B. (D) and (E) Immunofluorescent staining of tissue sections for PDGFR $\alpha$  and SMA (cytoplasmic). (D) PDGFR $\alpha$  is broadly expressed in the proximal midgut mesenchymal cells at E12.5. e - endoderm, m - gut tube mesenchyme (E) PDGFR $\alpha$  expression was detected in SMA- sub-epithelial cells and was lower or absent in SMA<sup>low</sup> cells SM (yellow asterisks - \*) at E18.5. Yellow boxes show substacks to only visualize specific DAPI+ nuclei from the areas of the magnified insets. All scale bars = 50 $\mu$ m.

Fig. S3

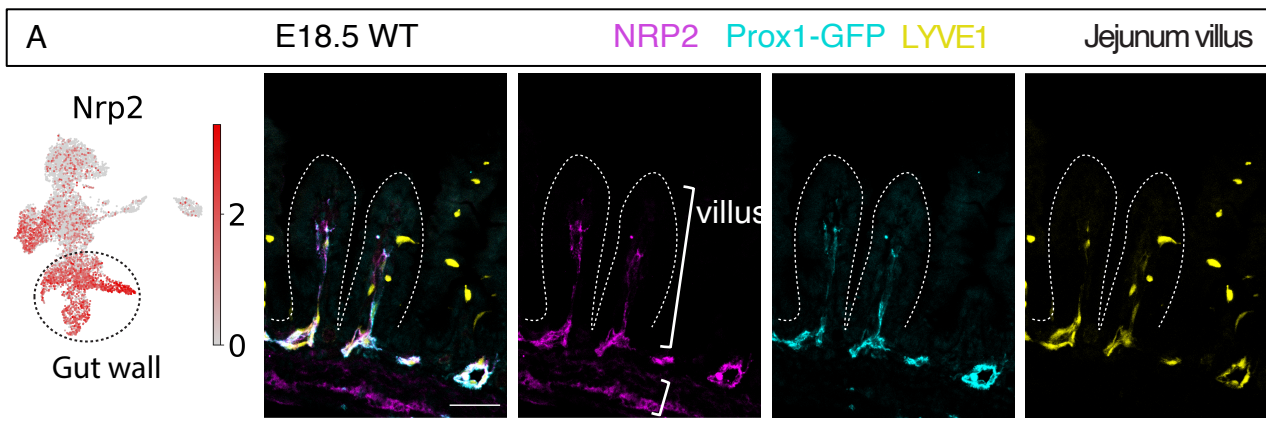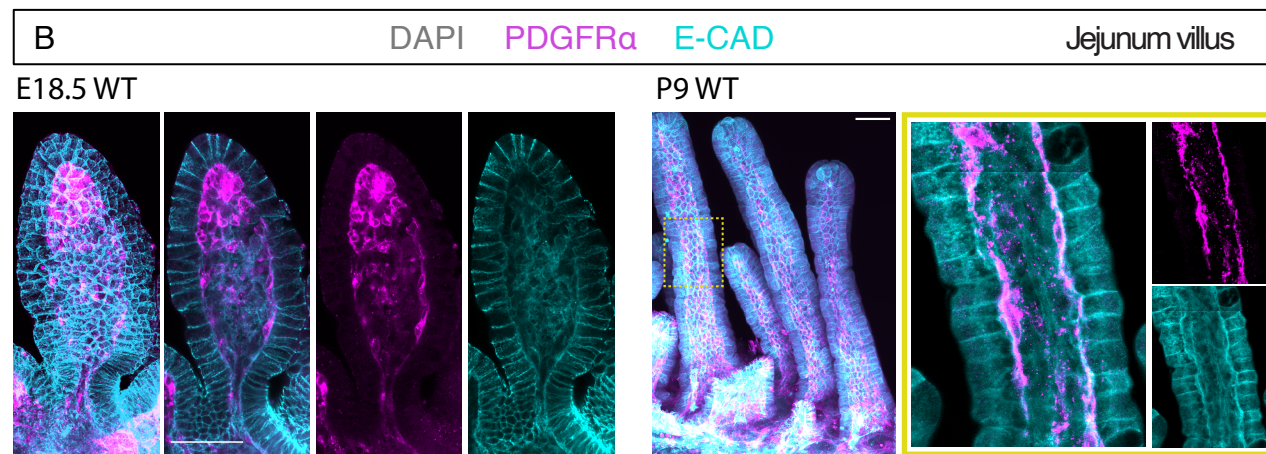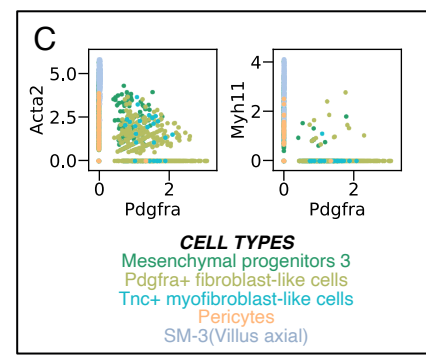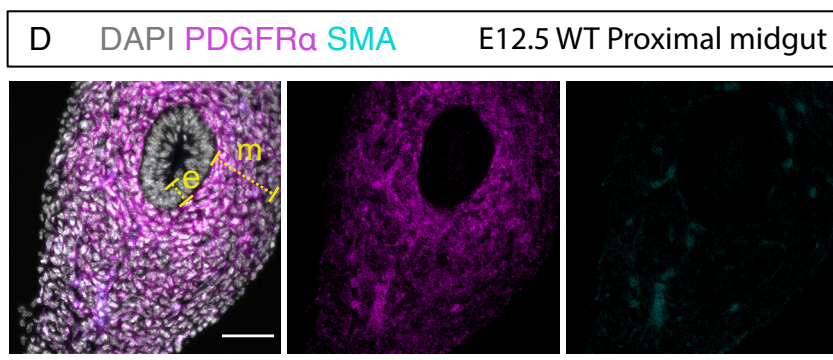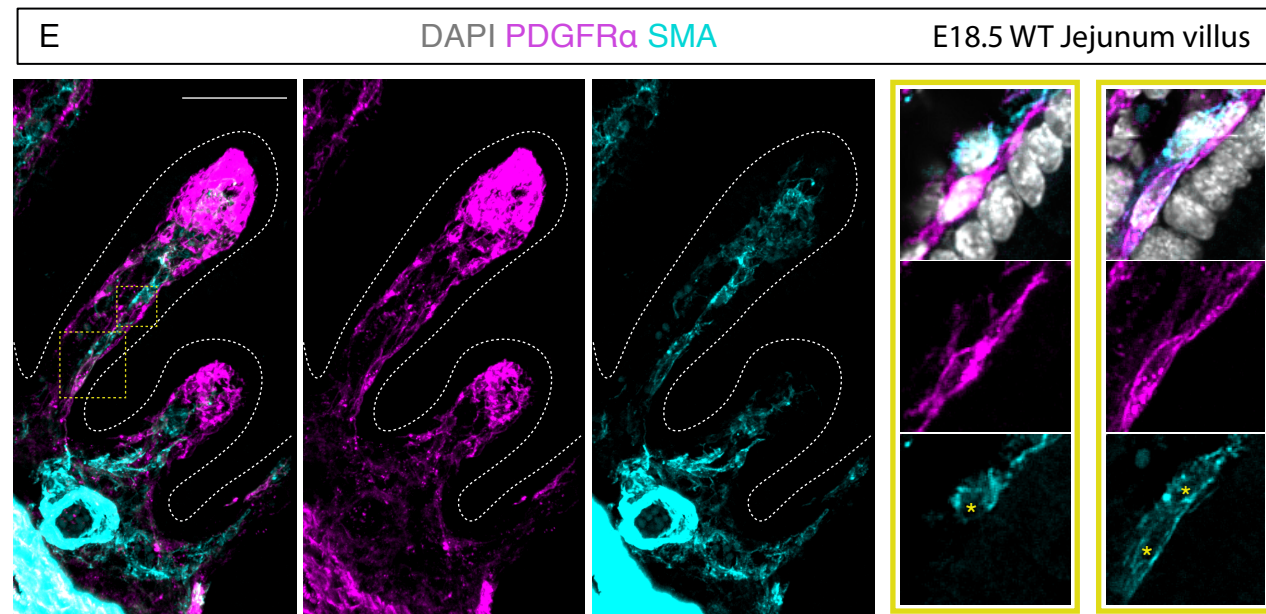

**Figure S4. Analyzing the heterogeneity of perinatal fibroblast-like cells from the small intestinal mesenchyme.** (A) UMAP plots of 1,708 single-cell transcriptomes from gut musculature fibroblast-like cells clustered by gene expression and colored by cluster labels and development stage. (B) Dot plot showing the expression of signaling ligands and inhibitors that define adult gut fibroblast heterogeneity in the fibroblast-like cell clusters. (C) Dot plot showing the differential gene expression analysis of perinatal fibroblast cell clusters. (D) Dot plot showing the expression of literature-derived genes defining adult gut fibroblast heterogeneity in the perinatal fibroblast cell clusters. (E) UMAP plots show the expression of genes associated with a myofibroblast-like cell phenotype. (F) Immunofluorescent staining of a jejunal villi section at P9 for TNC (intra/extracellular) and SMA. All scale bars = 50 $\mu$ m.

Fig. S4

**A** Perinatal fibroblast-like cells

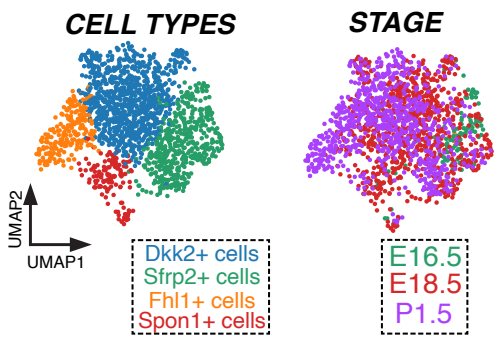

**B** Expression of signaling molecules in perinatal fibroblast-like clusters

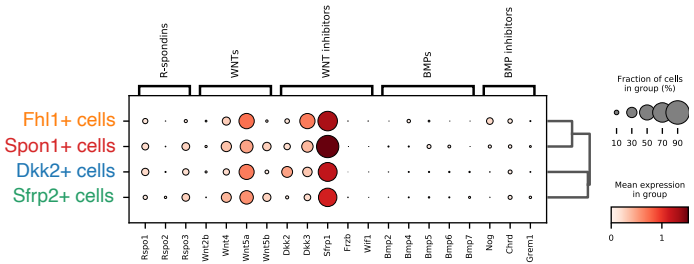

**C** Differentially expressed genes in perinatal fibroblast-like clusters

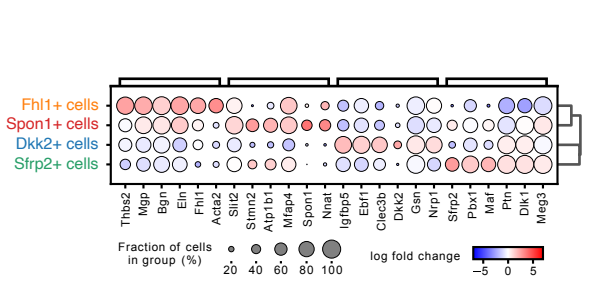

**D** Expression of adult fibroblast heterogeneity markers in perinatal fibroblast-like clusters

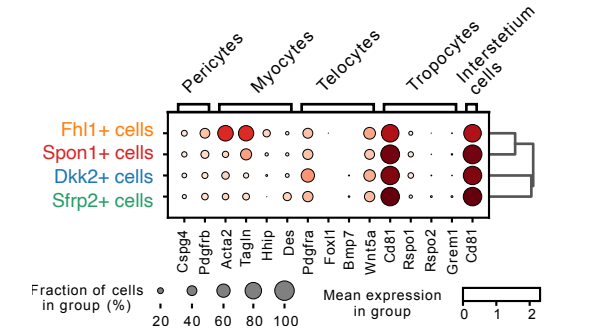

**E** Subset of perinatal fibroblasts display a myofibroblast-like transcriptional signature

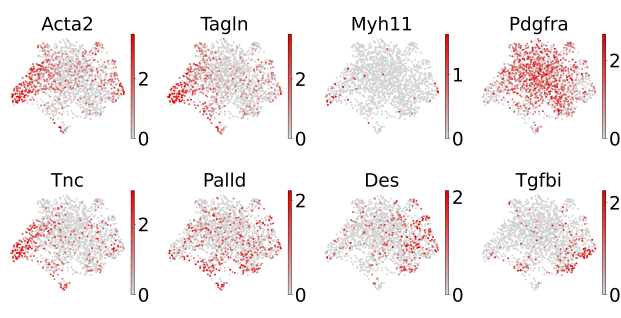

**F** P9 WT TNC SMA Jejunum villus

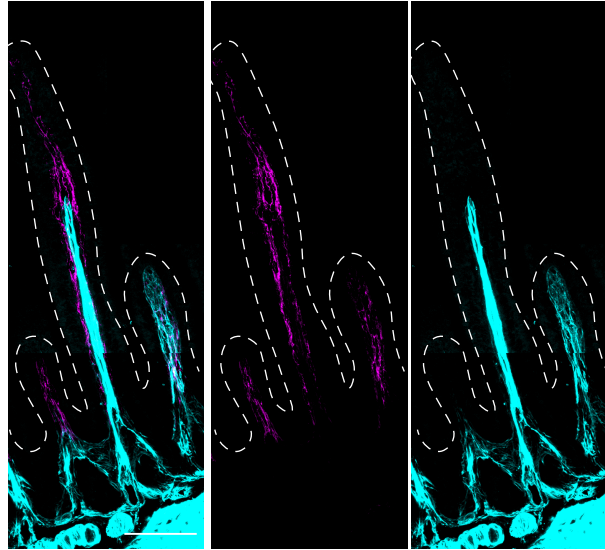



**Figure S5. NOTCH signaling regulates SM assembly in the villus and the mesentery. (A)** Immunofluorescent staining of jejunal villi section at P9 for HEY2 (intracellular) and SMA; magenta box shows a magnified inset. **(B)** Immunofluorescent staining of jejunal villi section at P9 for MCAM (extracellular/on cell membrane) and SMA; Cyan box shows a magnified inset. MCAM is expressed in villus SM fibers and the surrounding villus blood capillaries. **(C)** Immunofluorescent staining of *Prox1*-GFP (intracellular reporter) jejunal villi tissue sections at E18.5 for DLL4 (on cell membrane). A yellow dotted line outlines the lacteal with a DLL4+ tip. **(D)** Whole-mount immunofluorescent staining of jejunal villi for LYVE1 and SMA. Induced gene knockout of *Notch3* with *Hoxb6 Cre* results in a compromised assembly of villus SM around the lacteal (top panel). Binned quantification of the percentage of villi with given ratios of lacteal and villus SM lengths upon *Notch3* gene knockout using *Hoxb6 Cre* (bottom panel). Compared using two-way ANOVA followed by Šídák's multiple comparisons test (presented as mean  $\pm$  SEM). iKO - inducibly knocked out. **(E)** Schematic for measurement of lacteal, SM, and villus lengths and filopodia presence. All scale bars = 50 $\mu$ m.



Fig. S5

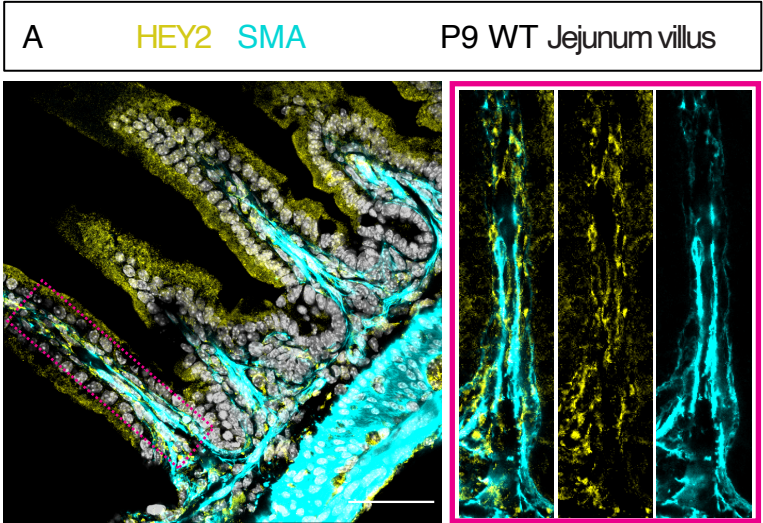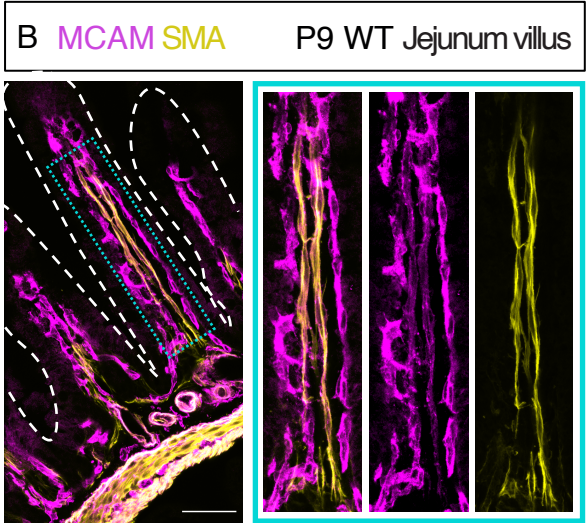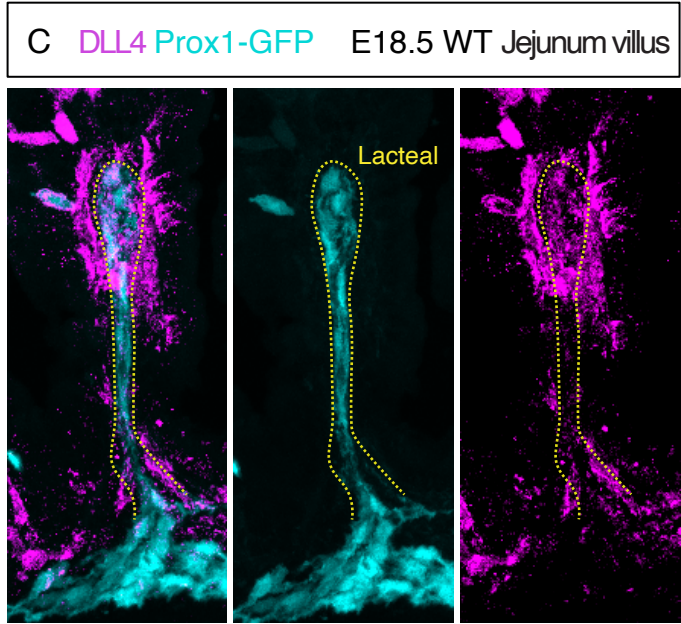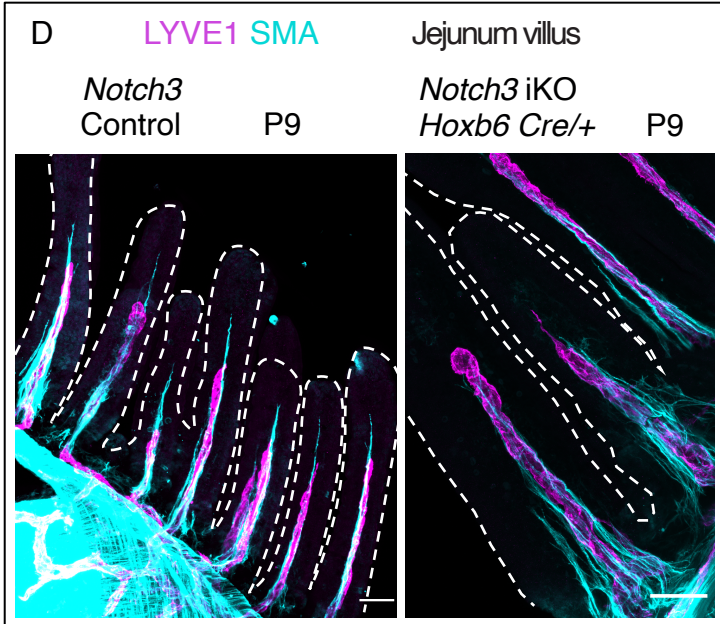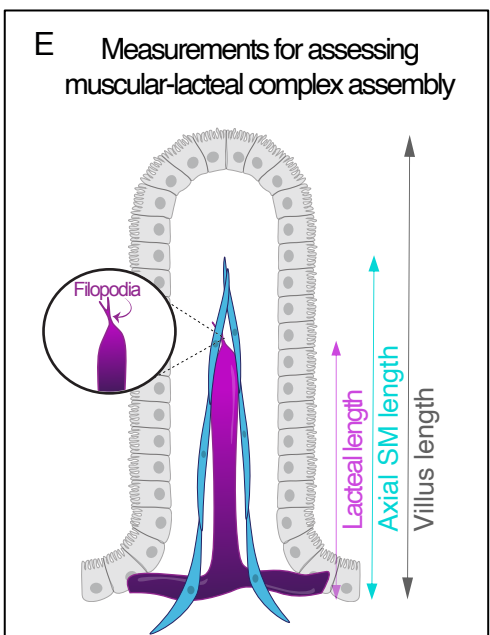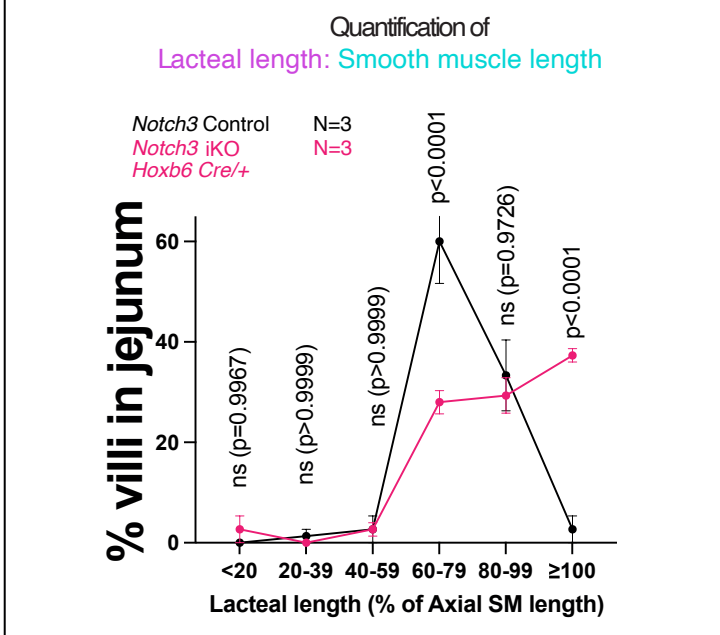

**Figure S6. Quantitative assessment of lacteal-villus SM structure upon induction of *Notch3* and *Dll4* knockout.** (A-C) Binned quantification of the percentage of villi with a given villus SM length normalized to villus length upon inducing *Notch3* gene knockout using (A) *Pdgfra CreERT2* and (B) *Hoxb6 Cre* drivers and (C) inducing *Dll4* gene knockout using *Prox1 CreERT2*. (D-F) Binned quantification of the percentage of villi with given lacteal length normalized to villus length upon inducing *Notch3* gene knockout using (D) *Pdgfra CreERT2* and (E) *Hoxb6 Cre* drivers and (F) inducing *Dll4* gene knockout using *Prox1 CreERT2*. Length ratios in Fig. S6 A-F were compared by two-way ANOVA followed by Šidák's multiple comparisons test (presented as mean  $\pm$  SEM). (G-I) Quantification of the percentage of lacteals counted with filopodia upon inducing *Notch3* gene knockout using (G) *Pdgfra CreERT2* and (H) *Hoxb6 Cre* drivers and (I) inducing *Dll4* gene knockout using *Prox1 CreERT2*. The comparison was made using an unpaired t-test (presented as mean  $\pm$  SEM). (J) Whole-mount immunofluorescent staining of jejunal mesentery for CD31 (on cell membrane) and SMA. *Notch3* iKO with *Hoxb6 Cre* results in loss of vascular SM coverage on mesenteric blood vessels. iKO - inducibly knocked out. All scale bars = 50 $\mu$ m.

Fig. S6

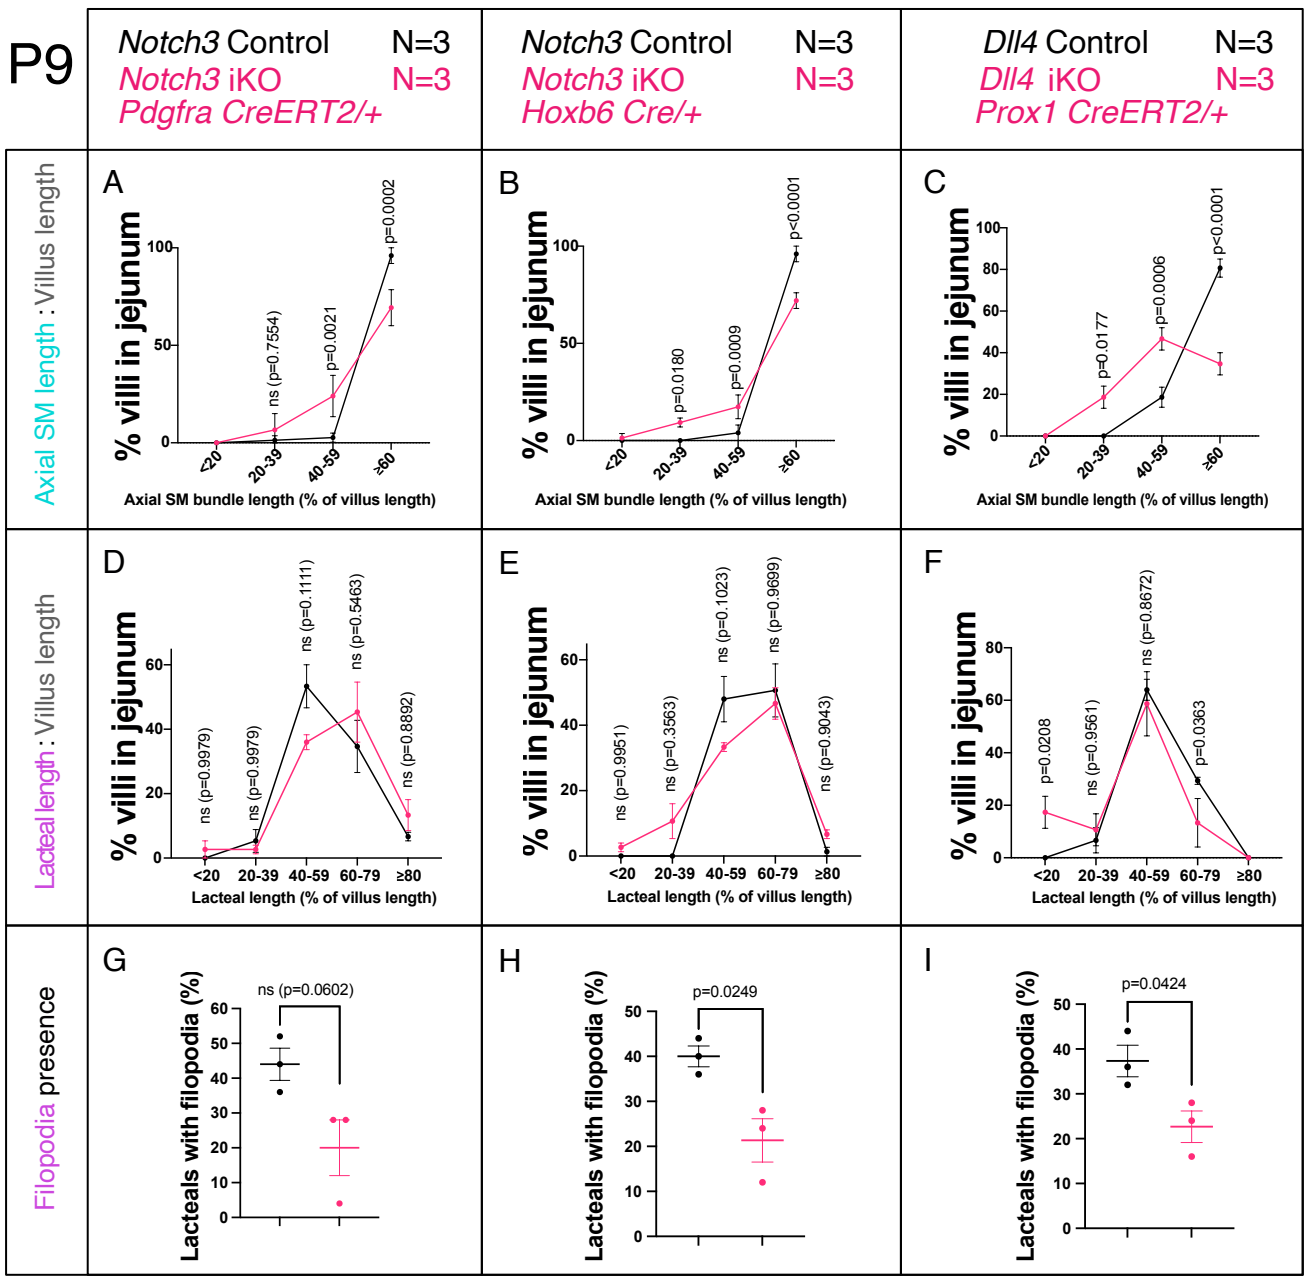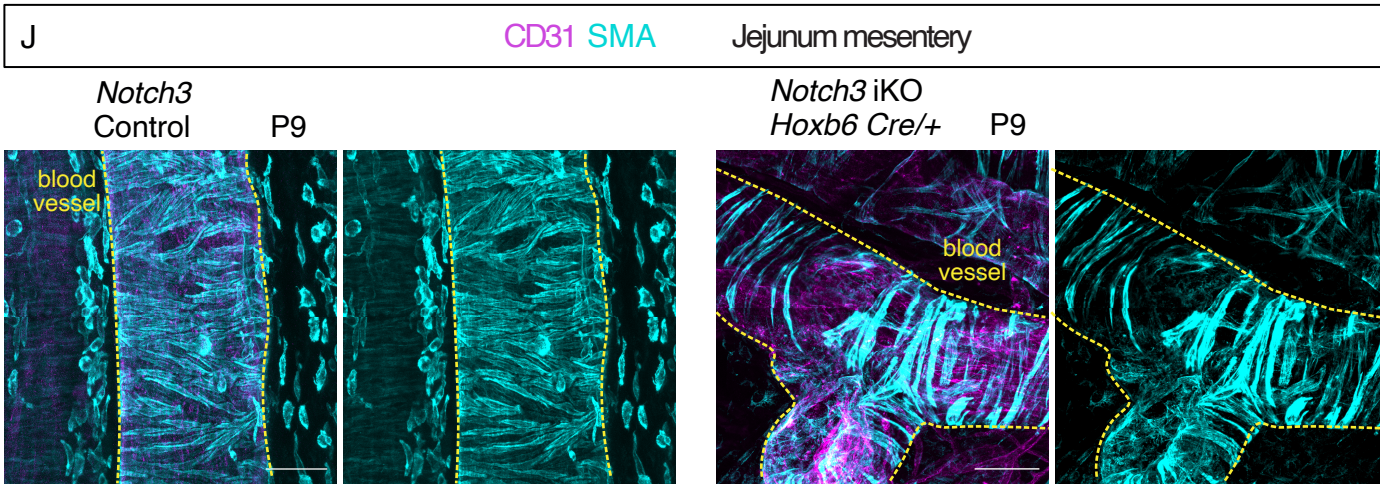

**Table S1.** Differential gene expression analysis results for top 50 gene markers for all intestinal cell types in the intestinal scRNA-seq data.

**Table S1:**

| Intestinal cell type markers |            |                |           |           |                         |
|------------------------------|------------|----------------|-----------|-----------|-------------------------|
| names                        | scores     | logfoldchanges | pvals     | pvals_adj | celltypes               |
| Gm42418                      | 55.22175   | 2.050854       | 0         | 0         | Mt-enriched progenitors |
| mt-Co3                       | 44.62211   | 0.7420995      | 0         | 0         | Mt-enriched progenitors |
| mt-Atp6                      | 44.296143  | 0.7363998      | 0         | 0         | Mt-enriched progenitors |
| mt-Nd2                       | 43.04233   | 0.802821       | 0         | 0         | Mt-enriched progenitors |
| mt-Nd4l                      | 39.941357  | 1.9222971      | 0         | 0         | Mt-enriched progenitors |
| mt-Nd4                       | 38.96214   | 0.6512708      | 0         | 0         | Mt-enriched progenitors |
| mt-Co2                       | 38.181416  | 0.5975924      | 0         | 0         | Mt-enriched progenitors |
| mt-Nd5                       | 32.866264  | 0.7411984      | 6.67E-237 | 2.19E-234 | Mt-enriched progenitors |
| Rps26                        | 32.66595   | 0.49614283     | 4.76E-234 | 1.42E-231 | Mt-enriched progenitors |
| mt-Cytb                      | 31.926195  | 0.4850293      | 1.16E-223 | 2.64E-221 | Mt-enriched progenitors |
| mt-Nd1                       | 30.845373  | 0.52438986     | 6.46E-209 | 1.09E-206 | Mt-enriched progenitors |
| Hbb-y                        | 28.349735  | 2.60736        | 8.43E-177 | 7.93E-175 | Mt-enriched progenitors |
| Npm1                         | 21.928015  | 0.40209118     | 1.40E-106 | 2.85E-105 | Mt-enriched progenitors |
| Rpl13                        | 20.840704  | 0.29602665     | 1.85E-96  | 3.03E-95  | Mt-enriched progenitors |
| Mdk                          | 20.404648  | 1.1294323      | 1.52E-92  | 2.32E-91  | Mt-enriched progenitors |
| H2afz                        | 20.309578  | 0.4804583      | 1.06E-91  | 1.59E-90  | Mt-enriched progenitors |
| Rpsa                         | 19.5751    | 0.35181066     | 2.52E-85  | 3.34E-84  | Mt-enriched progenitors |
| Rps8                         | 19.542267  | 0.2248474      | 4.80E-85  | 6.32E-84  | Mt-enriched progenitors |
| Rps3a1                       | 19.32935   | 0.26723212     | 3.04E-83  | 3.90E-82  | Mt-enriched progenitors |
| Ppia                         | 19.3251    | 0.22645505     | 3.30E-83  | 4.22E-82  | Mt-enriched progenitors |
| Ptma                         | 19.214653  | 0.3820019      | 2.79E-82  | 3.50E-81  | Mt-enriched progenitors |
| Rpl23a                       | 18.162056  | 0.055260044    | 1.03E-73  | 1.09E-72  | Mt-enriched progenitors |
| Eef1a1                       | 18.09719   | 0.19793108     | 3.35E-73  | 3.50E-72  | Mt-enriched progenitors |
| Rps5                         | 18.013172  | 0.31193662     | 1.54E-72  | 1.59E-71  | Mt-enriched progenitors |
| Tubb5                        | 17.838688  | 0.44411156     | 3.54E-71  | 3.57E-70  | Mt-enriched progenitors |
| Rpl10a                       | 17.372416  | 0.099090315    | 1.33E-67  | 1.26E-66  | Mt-enriched progenitors |
| Rps10                        | 16.889242  | 0.16743271     | 5.40E-64  | 4.79E-63  | Mt-enriched progenitors |
| Rps4x                        | 16.18252   | 0.19260421     | 6.70E-59  | 5.44E-58  | Mt-enriched progenitors |
| Rps24                        | 16.122335  | 0.15790293     | 1.78E-58  | 1.43E-57  | Mt-enriched progenitors |
| Rpl27a                       | 15.935956  | 0.11532711     | 3.57E-57  | 2.82E-56  | Mt-enriched progenitors |
| Hnrnpa1                      | 15.865564  | 0.23972204     | 1.10E-56  | 8.59E-56  | Mt-enriched progenitors |
| Rplp0                        | 15.833658  | 0.2369266      | 1.82E-56  | 1.42E-55  | Mt-enriched progenitors |
| Acta2                        | 15.748067  | 1.8949043      | 7.08E-56  | 5.46E-55  | Mt-enriched progenitors |
| Rpl5                         | 15.647737  | 0.055734314    | 3.44E-55  | 2.62E-54  | Mt-enriched progenitors |
| Ubb                          | 15.4225855 | 0.010287929    | 1.15E-53  | 8.49E-53  | Mt-enriched progenitors |
| Rpl11                        | 15.354205  | -0.014119527   | 3.32E-53  | 2.42E-52  | Mt-enriched progenitors |
| Cdkn1c                       | 14.320122  | 0.6634984      | 1.64E-46  | 1.04E-45  | Mt-enriched progenitors |
| Rpl8                         | 14.117662  | 0.10104622     | 2.96E-45  | 1.84E-44  | Mt-enriched progenitors |
| Rack1                        | 14.054337  | 0.09637018     | 7.25E-45  | 4.47E-44  | Mt-enriched progenitors |
| Rps6                         | 13.840042  | 0.009851726    | 1.46E-43  | 8.78E-43  | Mt-enriched progenitors |
| Eef1b2                       | 13.333687  | 0.03489094     | 1.47E-40  | 8.32E-40  | Mt-enriched progenitors |
| Stmn1                        | 13.162587  | 0.48860225     | 1.44E-39  | 7.98E-39  | Mt-enriched progenitors |
| H3f3a                        | 13.054708  | -0.071771696   | 5.97E-39  | 3.27E-38  | Mt-enriched progenitors |
| mt-Nd3                       | 13.009311  | 0.117468014    | 1.08E-38  | 5.90E-38  | Mt-enriched progenitors |

|          |           |              |          |          |                                 |
|----------|-----------|--------------|----------|----------|---------------------------------|
| Rpl3     | 12.914823 | 0.05243501   | 3.71E-38 | 2.00E-37 | Mt-enriched progenitors         |
| Rps9     | 12.892034 | 0.08725476   | 4.99E-38 | 2.68E-37 | Mt-enriched progenitors         |
| Rps20    | 12.694141 | 0.06722294   | 6.37E-37 | 3.35E-36 | Mt-enriched progenitors         |
| Rpl18    | 12.588078 | 0.08362859   | 2.46E-36 | 1.28E-35 | Mt-enriched progenitors         |
| Rps7     | 12.566561 | -0.012194806 | 3.22E-36 | 1.67E-35 | Mt-enriched progenitors         |
| Rpl22    | 12.03908  | -0.14896789  | 2.21E-33 | 1.08E-32 | Mt-enriched progenitors         |
| Ptn      | 78.945564 | 4.3167024    | 0        | 0        | Embryonic gut mesenchymal cells |
| Dlk1     | 76.66971  | 4.229639     | 0        | 0        | Embryonic gut mesenchymal cells |
| Cdkn1c   | 72.90695  | 2.9192133    | 0        | 0        | Embryonic gut mesenchymal cells |
| Meg3     | 72.3049   | 3.9820652    | 0        | 0        | Embryonic gut mesenchymal cells |
| Col3a1   | 72.09461  | 4.1242456    | 0        | 0        | Embryonic gut mesenchymal cells |
| Itm2a    | 71.98131  | 3.6353319    | 0        | 0        | Embryonic gut mesenchymal cells |
| Col1a1   | 71.31079  | 4.044361     | 0        | 0        | Embryonic gut mesenchymal cells |
| Mdk      | 71.05593  | 3.0749211    | 0        | 0        | Embryonic gut mesenchymal cells |
| Col1a2   | 70.7013   | 3.8208458    | 0        | 0        | Embryonic gut mesenchymal cells |
| Cxcl12   | 69.6521   | 3.7261298    | 0        | 0        | Embryonic gut mesenchymal cells |
| Peg3     | 68.161    | 3.3852537    | 0        | 0        | Embryonic gut mesenchymal cells |
| Lgals1   | 66.76427  | 3.0294962    | 0        | 0        | Embryonic gut mesenchymal cells |
| Mfap4    | 66.06227  | 3.4483144    | 0        | 0        | Embryonic gut mesenchymal cells |
| Slit2    | 65.31612  | 3.8136482    | 0        | 0        | Embryonic gut mesenchymal cells |
| Plagl1   | 63.713177 | 2.7603307    | 0        | 0        | Embryonic gut mesenchymal cells |
| Mfap2    | 63.204384 | 2.627499     | 0        | 0        | Embryonic gut mesenchymal cells |
| Sulf2    | 62.68722  | 3.0231998    | 0        | 0        | Embryonic gut mesenchymal cells |
| Nr2f2    | 62.189785 | 2.9076881    | 0        | 0        | Embryonic gut mesenchymal cells |
| Dcn      | 61.543835 | 3.569093     | 0        | 0        | Embryonic gut mesenchymal cells |
| Gas1     | 59.423763 | 2.8051965    | 0        | 0        | Embryonic gut mesenchymal cells |
| Gpc3     | 58.375153 | 2.4563487    | 0        | 0        | Embryonic gut mesenchymal cells |
| Ifitm1   | 58.357662 | 2.9445179    | 0        | 0        | Embryonic gut mesenchymal cells |
| Rcn3     | 57.854507 | 2.495613     | 0        | 0        | Embryonic gut mesenchymal cells |
| Ccdc80   | 57.274128 | 3.131684     | 0        | 0        | Embryonic gut mesenchymal cells |
| Lum      | 56.84273  | 3.3037667    | 0        | 0        | Embryonic gut mesenchymal cells |
| Meis2    | 56.59872  | 2.5061584    | 0        | 0        | Embryonic gut mesenchymal cells |
| Pbx1     | 55.71527  | 2.3287067    | 0        | 0        | Embryonic gut mesenchymal cells |
| Grb10    | 55.54725  | 2.014409     | 0        | 0        | Embryonic gut mesenchymal cells |
| Igf1     | 55.38201  | 3.2143197    | 0        | 0        | Embryonic gut mesenchymal cells |
| Tpm2     | 55.00728  | 2.5270264    | 0        | 0        | Embryonic gut mesenchymal cells |
| Col6a1   | 54.93239  | 2.552864     | 0        | 0        | Embryonic gut mesenchymal cells |
| Sfr1     | 54.613293 | 1.7225825    | 0        | 0        | Embryonic gut mesenchymal cells |
| Tshz2    | 54.599316 | 2.2937884    | 0        | 0        | Embryonic gut mesenchymal cells |
| Col5a2   | 54.02136  | 2.3356779    | 0        | 0        | Embryonic gut mesenchymal cells |
| Basp1    | 53.83214  | 2.2184188    | 0        | 0        | Embryonic gut mesenchymal cells |
| Sfrp2    | 53.756813 | 3.527793     | 0        | 0        | Embryonic gut mesenchymal cells |
| Kcnq1ot1 | 53.53762  | 2.1770139    | 0        | 0        | Embryonic gut mesenchymal cells |
| Emp3     | 53.465992 | 2.249961     | 0        | 0        | Embryonic gut mesenchymal cells |
| Serpinh1 | 53.411312 | 1.9481969    | 0        | 0        | Embryonic gut mesenchymal cells |
| Igf2r    | 53.18072  | 2.1774852    | 0        | 0        | Embryonic gut mesenchymal cells |
| Islr     | 52.799385 | 2.9895015    | 0        | 0        | Embryonic gut mesenchymal cells |

|               |           |           |   |   |                                 |
|---------------|-----------|-----------|---|---|---------------------------------|
| Nrk           | 52.575447 | 3.1605518 | 0 | 0 | Embryonic gut mesenchymal cells |
| Col5a1        | 51.479637 | 2.4922316 | 0 | 0 | Embryonic gut mesenchymal cells |
| 6330403K07Rik | 51.477936 | 2.542841  | 0 | 0 | Embryonic gut mesenchymal cells |
| Fbn2          | 51.056614 | 2.4368393 | 0 | 0 | Embryonic gut mesenchymal cells |
| Col6a2        | 50.477882 | 2.5414813 | 0 | 0 | Embryonic gut mesenchymal cells |
| Maged2        | 50.13233  | 1.928196  | 0 | 0 | Embryonic gut mesenchymal cells |
| Nenf          | 49.704247 | 1.7338778 | 0 | 0 | Embryonic gut mesenchymal cells |
| Zeb2          | 49.486893 | 2.3481064 | 0 | 0 | Embryonic gut mesenchymal cells |
| Tpm1          | 49.39089  | 1.8290464 | 0 | 0 | Embryonic gut mesenchymal cells |
| Meis2         | 63.716145 | 3.4395528 | 0 | 0 | Gut wall SM and ICCs            |
| Mab21l2       | 58.512177 | 3.70486   | 0 | 0 | Gut wall SM and ICCs            |
| Foxp2         | 56.907925 | 4.7088127 | 0 | 0 | Gut wall SM and ICCs            |
| Myl9          | 54.55882  | 3.7660847 | 0 | 0 | Gut wall SM and ICCs            |
| Psd           | 52.931683 | 3.9433517 | 0 | 0 | Gut wall SM and ICCs            |
| Tpm2          | 52.75127  | 3.3411193 | 0 | 0 | Gut wall SM and ICCs            |
| Meg3          | 52.10823  | 3.3097026 | 0 | 0 | Gut wall SM and ICCs            |
| Lsp1          | 51.878147 | 3.250352  | 0 | 0 | Gut wall SM and ICCs            |
| Foxf1         | 51.529892 | 3.7153242 | 0 | 0 | Gut wall SM and ICCs            |
| Mfap4         | 50.597324 | 2.9257329 | 0 | 0 | Gut wall SM and ICCs            |
| Cald1         | 50.060814 | 2.5104866 | 0 | 0 | Gut wall SM and ICCs            |
| Tshz2         | 49.409145 | 2.479462  | 0 | 0 | Gut wall SM and ICCs            |
| Tpm1          | 49.30804  | 2.383468  | 0 | 0 | Gut wall SM and ICCs            |
| Acta2         | 49.0889   | 4.2892942 | 0 | 0 | Gut wall SM and ICCs            |
| Tcf21         | 48.647305 | 3.240261  | 0 | 0 | Gut wall SM and ICCs            |
| Smoc2         | 48.490566 | 3.307185  | 0 | 0 | Gut wall SM and ICCs            |
| Ptn           | 48.459465 | 2.9119325 | 0 | 0 | Gut wall SM and ICCs            |
| Cpe           | 48.200287 | 2.904587  | 0 | 0 | Gut wall SM and ICCs            |
| Mylk          | 47.61521  | 3.9271388 | 0 | 0 | Gut wall SM and ICCs            |
| Foxp1         | 46.914715 | 2.2720158 | 0 | 0 | Gut wall SM and ICCs            |
| Pbx1          | 46.24322  | 2.2745633 | 0 | 0 | Gut wall SM and ICCs            |
| Mfap2         | 45.40918  | 2.1915116 | 0 | 0 | Gut wall SM and ICCs            |
| Mdk           | 44.0885   | 2.2835927 | 0 | 0 | Gut wall SM and ICCs            |
| Ldhb          | 43.674755 | 2.499247  | 0 | 0 | Gut wall SM and ICCs            |
| Plagl1        | 43.476494 | 2.1811397 | 0 | 0 | Gut wall SM and ICCs            |
| Dlk1          | 41.24301  | 2.4088    | 0 | 0 | Gut wall SM and ICCs            |
| Col6a1        | 41.05064  | 2.228946  | 0 | 0 | Gut wall SM and ICCs            |
| Col23a1       | 39.669605 | 3.8224094 | 0 | 0 | Gut wall SM and ICCs            |
| Emp3          | 39.583996 | 1.9637014 | 0 | 0 | Gut wall SM and ICCs            |
| Osr1          | 39.52665  | 3.1534233 | 0 | 0 | Gut wall SM and ICCs            |
| Rbpms         | 39.38933  | 1.8872286 | 0 | 0 | Gut wall SM and ICCs            |
| Mpped2        | 38.868988 | 2.9437077 | 0 | 0 | Gut wall SM and ICCs            |
| Tgfb1i1       | 38.48308  | 2.4228466 | 0 | 0 | Gut wall SM and ICCs            |
| Lgals1        | 38.21143  | 2.0379891 | 0 | 0 | Gut wall SM and ICCs            |
| Actg2         | 38.136803 | 4.157855  | 0 | 0 | Gut wall SM and ICCs            |
| Emilin1       | 38.008755 | 2.109987  | 0 | 0 | Gut wall SM and ICCs            |
| Cdkn1c        | 37.897293 | 1.8348536 | 0 | 0 | Gut wall SM and ICCs            |
| Col3a1        | 37.718838 | 2.0780044 | 0 | 0 | Gut wall SM and ICCs            |



|          |           |           |           |           |                      |
|----------|-----------|-----------|-----------|-----------|----------------------|
| Gas1     | 37.56372  | 2.096485  | 0.00E+00  | 3.76E-306 | Gut wall SM and ICCs |
| Col1a1   | 37.550762 | 2.0287337 | 0.00E+00  | 5.98E-306 | Gut wall SM and ICCs |
| Atxn7l3b | 37.125557 | 1.4094803 | 1.09E-301 | 4.65E-299 | Gut wall SM and ICCs |
| Pde5a    | 37.123493 | 3.1115856 | 1.17E-301 | 4.91E-299 | Gut wall SM and ICCs |
| Actn1    | 36.753937 | 2.0262244 | 1.01E-295 | 4.12E-293 | Gut wall SM and ICCs |
| Meis1    | 36.453568 | 2.0733795 | 6.04E-291 | 2.42E-288 | Gut wall SM and ICCs |
| Cnn2     | 36.385433 | 1.8550379 | 7.24E-290 | 2.84E-287 | Gut wall SM and ICCs |
| Ifitm1   | 36.380787 | 2.1855395 | 8.57E-290 | 3.30E-287 | Gut wall SM and ICCs |
| Tgfb1    | 36.117195 | 2.3868785 | 1.22E-285 | 4.60E-283 | Gut wall SM and ICCs |
| Sfr1     | 36.043858 | 1.3433397 | 1.72E-284 | 6.38E-282 | Gut wall SM and ICCs |
| Fbn2     | 35.9414   | 2.1014433 | 6.90E-283 | 2.51E-280 | Gut wall SM and ICCs |
| Ppp1r14a | 35.676136 | 3.040072  | 9.27E-279 | 3.31E-276 | Gut wall SM and ICCs |
| Myl9     | 23.24291  | 6.357422  | 1.68E-119 | 3.30E-115 | Villus SM cells      |
| Cald1    | 23.056437 | 4.5162992 | 1.27E-117 | 1.25E-113 | Villus SM cells      |
| Tagln    | 22.927877 | 7.4723625 | 2.45E-116 | 1.60E-112 | Villus SM cells      |
| Tpm1     | 22.841188 | 4.3872786 | 1.79E-115 | 8.78E-112 | Villus SM cells      |
| Acta2    | 22.77456  | 7.1621795 | 8.20E-115 | 3.22E-111 | Villus SM cells      |
| Myh11    | 22.753717 | 7.4150047 | 1.32E-114 | 4.32E-111 | Villus SM cells      |
| Notch3   | 22.59172  | 6.2829595 | 5.23E-113 | 1.47E-109 | Villus SM cells      |
| Crip1    | 22.493162 | 4.898636  | 4.84E-112 | 1.19E-108 | Villus SM cells      |
| Itga1    | 22.37222  | 5.414259  | 7.34E-111 | 1.60E-107 | Villus SM cells      |
| Tpm2     | 22.264046 | 5.107404  | 8.25E-110 | 1.62E-106 | Villus SM cells      |
| Aoc3     | 22.204529 | 7.175294  | 3.11E-109 | 5.55E-106 | Villus SM cells      |
| Mustn1   | 22.068495 | 7.309997  | 6.35E-108 | 1.04E-104 | Villus SM cells      |
| Mcam     | 21.995644 | 4.8955116 | 3.17E-107 | 4.79E-104 | Villus SM cells      |
| Jag1     | 21.963966 | 5.5547223 | 6.37E-107 | 8.94E-104 | Villus SM cells      |
| Flna     | 21.660809 | 3.970021  | 4.81E-104 | 6.30E-101 | Villus SM cells      |
| Pde3a    | 21.494814 | 4.829668  | 1.74E-102 | 2.14E-99  | Villus SM cells      |
| Eln      | 21.076513 | 6.763937  | 1.31E-98  | 1.51E-95  | Villus SM cells      |
| Actn1    | 21.029022 | 4.067434  | 3.56E-98  | 3.89E-95  | Villus SM cells      |
| Ndufa4l2 | 21.008862 | 5.765369  | 5.44E-98  | 5.63E-95  | Villus SM cells      |
| Gm13889  | 20.832863 | 5.149148  | 2.18E-96  | 2.14E-93  | Villus SM cells      |
| 7-Sep    | 20.803616 | 2.7574422 | 4.01E-96  | 3.76E-93  | Villus SM cells      |
| Tinag1   | 20.646194 | 4.727289  | 1.06E-94  | 9.43E-92  | Villus SM cells      |
| Actg2    | 20.493322 | 5.446238  | 2.47E-93  | 2.11E-90  | Villus SM cells      |
| Lmod1    | 20.35727  | 6.896699  | 4.00E-92  | 3.28E-89  | Villus SM cells      |
| Ebf1     | 20.06908  | 4.0201297 | 1.38E-89  | 1.08E-86  | Villus SM cells      |
| Des      | 20.018885 | 4.5562387 | 3.77E-89  | 2.85E-86  | Villus SM cells      |
| Mylk     | 19.769741 | 4.18334   | 5.43E-87  | 3.95E-84  | Villus SM cells      |
| Parm1    | 19.559113 | 4.83483   | 3.45E-85  | 2.42E-82  | Villus SM cells      |
| Il13ra1  | 19.550528 | 5.552531  | 4.08E-85  | 2.77E-82  | Villus SM cells      |
| Igfbp7   | 19.534924 | 4.681866  | 5.54E-85  | 3.63E-82  | Villus SM cells      |
| Mrip1    | 19.509851 | 3.2659945 | 9.05E-85  | 5.74E-82  | Villus SM cells      |
| Cryab    | 19.462425 | 4.615676  | 2.29E-84  | 1.40E-81  | Villus SM cells      |
| Zeb2     | 19.333712 | 3.658651  | 2.80E-83  | 1.66E-80  | Villus SM cells      |
| Pdgfra   | 19.321325 | 4.092767  | 3.55E-83  | 2.05E-80  | Villus SM cells      |
| Axl      | 19.04588  | 4.1110225 | 7.11E-81  | 3.99E-78  | Villus SM cells      |



|         |           |           |          |          |                              |
|---------|-----------|-----------|----------|----------|------------------------------|
| Mef2c   | 18.95127  | 3.5805366 | 4.31E-80 | 2.35E-77 | Villus SM cells              |
| Cavin3  | 18.936806 | 3.1132085 | 5.67E-80 | 3.01E-77 | Villus SM cells              |
| S100a11 | 18.912397 | 2.790459  | 9.02E-80 | 4.66E-77 | Villus SM cells              |
| Lgals1  | 18.909836 | 3.2879026 | 9.47E-80 | 4.77E-77 | Villus SM cells              |
| Map3k20 | 18.808157 | 4.8804893 | 6.47E-79 | 3.18E-76 | Villus SM cells              |
| Gucy1a1 | 18.795109 | 4.4054832 | 8.28E-79 | 3.97E-76 | Villus SM cells              |
| Lgalsl  | 18.746939 | 4.652959  | 2.05E-78 | 9.59E-76 | Villus SM cells              |
| Inpp4b  | 18.700426 | 6.1014977 | 4.91E-78 | 2.24E-75 | Villus SM cells              |
| Itgb1   | 18.662842 | 2.4812727 | 9.93E-78 | 4.44E-75 | Villus SM cells              |
| Mfge8   | 18.537836 | 3.4495654 | 1.02E-76 | 4.47E-74 | Villus SM cells              |
| Cavin1  | 18.38893  | 3.311995  | 1.61E-75 | 6.88E-73 | Villus SM cells              |
| Rbpms   | 18.286673 | 2.8694232 | 1.06E-74 | 4.42E-72 | Villus SM cells              |
| Carmn   | 18.2492   | 4.9774036 | 2.10E-74 | 8.60E-72 | Villus SM cells              |
| Col4a1  | 18.246147 | 3.5404775 | 2.22E-74 | 8.90E-72 | Villus SM cells              |
| Vcl     | 18.239594 | 3.7320158 | 2.50E-74 | 9.84E-72 | Villus SM cells              |
| Col3a1  | 68.81824  | 6.070898  | 0        | 0        | Mature fibroblast-like cells |
| Col1a2  | 68.807434 | 6.0038905 | 0        | 0        | Mature fibroblast-like cells |
| Dcn     | 68.53309  | 6.660593  | 0        | 0        | Mature fibroblast-like cells |
| Col1a1  | 68.48009  | 6.0437093 | 0        | 0        | Mature fibroblast-like cells |
| Postn   | 68.0536   | 6.666659  | 0        | 0        | Mature fibroblast-like cells |
| Gsn     | 67.52638  | 5.1995945 | 0        | 0        | Mature fibroblast-like cells |
| Col6a1  | 66.84064  | 5.0187817 | 0        | 0        | Mature fibroblast-like cells |
| Lum     | 66.35979  | 5.6463695 | 0        | 0        | Mature fibroblast-like cells |
| Col6a2  | 64.16716  | 4.8444805 | 0        | 0        | Mature fibroblast-like cells |
| Itm2a   | 63.068893 | 4.799483  | 0        | 0        | Mature fibroblast-like cells |
| Gpc3    | 62.030563 | 3.8312948 | 0        | 0        | Mature fibroblast-like cells |
| Col5a1  | 61.68618  | 4.3954663 | 0        | 0        | Mature fibroblast-like cells |
| Col6a3  | 60.95909  | 4.696173  | 0        | 0        | Mature fibroblast-like cells |
| Dlk1    | 60.932144 | 4.662213  | 0        | 0        | Mature fibroblast-like cells |
| Col14a1 | 60.518948 | 5.3290095 | 0        | 0        | Mature fibroblast-like cells |
| Meg3    | 59.72622  | 4.3124638 | 0        | 0        | Mature fibroblast-like cells |
| Col5a2  | 58.368027 | 3.6140187 | 0        | 0        | Mature fibroblast-like cells |
| Peg3    | 58.31231  | 3.7968574 | 0        | 0        | Mature fibroblast-like cells |
| S100a6  | 57.86392  | 4.127279  | 0        | 0        | Mature fibroblast-like cells |
| Vcan    | 57.325916 | 4.598796  | 0        | 0        | Mature fibroblast-like cells |
| Mfap5   | 57.164886 | 7.180412  | 0        | 0        | Mature fibroblast-like cells |
| Fstl1   | 56.814976 | 3.2235727 | 0        | 0        | Mature fibroblast-like cells |
| Bgn     | 56.01776  | 3.9652283 | 0        | 0        | Mature fibroblast-like cells |
| Itih5   | 55.356552 | 6.297062  | 0        | 0        | Mature fibroblast-like cells |
| Sparc   | 54.93775  | 3.0283134 | 0        | 0        | Mature fibroblast-like cells |
| Fbn1    | 54.697178 | 3.8747296 | 0        | 0        | Mature fibroblast-like cells |
| Ptn     | 54.100525 | 3.8641572 | 0        | 0        | Mature fibroblast-like cells |
| Zim1    | 52.07769  | 5.4143896 | 0        | 0        | Mature fibroblast-like cells |
| Ebf1    | 51.806595 | 4.0701723 | 0        | 0        | Mature fibroblast-like cells |
| Ltbp4   | 51.66096  | 3.4199617 | 0        | 0        | Mature fibroblast-like cells |
| Nid1    | 51.435665 | 3.2807417 | 0        | 0        | Mature fibroblast-like cells |
| Akap12  | 51.163757 | 3.4093466 | 0        | 0        | Mature fibroblast-like cells |

|          |           |           |           |           |                              |
|----------|-----------|-----------|-----------|-----------|------------------------------|
| Fbln1    | 50.824837 | 3.3421545 | 0         | 0         | Mature fibroblast-like cells |
| Cpe      | 50.642223 | 3.5481462 | 0         | 0         | Mature fibroblast-like cells |
| Serping1 | 50.34927  | 4.5167985 | 0         | 0         | Mature fibroblast-like cells |
| Zeb2     | 50.229095 | 3.3153687 | 0         | 0         | Mature fibroblast-like cells |
| Pcolce   | 49.87349  | 4.1551776 | 0         | 0         | Mature fibroblast-like cells |
| Cxcl12   | 49.821507 | 3.8162963 | 0         | 0         | Mature fibroblast-like cells |
| Nfix     | 49.43688  | 3.6513908 | 0         | 0         | Mature fibroblast-like cells |
| Ahnak    | 49.36701  | 2.9047375 | 0         | 0         | Mature fibroblast-like cells |
| Mfap2    | 48.62343  | 2.738882  | 0         | 0         | Mature fibroblast-like cells |
| Sparcl1  | 48.449398 | 3.0240214 | 0         | 0         | Mature fibroblast-like cells |
| Laptm4a  | 48.375343 | 2.0287054 | 0         | 0         | Mature fibroblast-like cells |
| Igfbp4   | 48.259552 | 2.3000944 | 0         | 0         | Mature fibroblast-like cells |
| Matn2    | 47.93846  | 5.0470047 | 0         | 0         | Mature fibroblast-like cells |
| Nrk      | 47.77457  | 3.9105058 | 0         | 0         | Mature fibroblast-like cells |
| Malat1   | 47.45972  | 2.4746706 | 0         | 0         | Mature fibroblast-like cells |
| Eln      | 47.42231  | 3.8588972 | 0         | 0         | Mature fibroblast-like cells |
| Mgp      | 47.33506  | 4.0952606 | 0         | 0         | Mature fibroblast-like cells |
| Tnxb     | 47.033676 | 5.9110074 | 0         | 0         | Mature fibroblast-like cells |
| Pdgfrb   | 26.57167  | 6.7837596 | 1.44E-155 | 2.84E-151 | Pericytes                    |
| Rgs5     | 26.138807 | 8.287025  | 1.32E-150 | 1.30E-146 | Pericytes                    |
| Col18a1  | 26.102139 | 5.225403  | 3.45E-150 | 2.26E-146 | Pericytes                    |
| Ebf1     | 25.772293 | 5.34448   | 1.81E-146 | 8.91E-143 | Pericytes                    |
| Myh9     | 24.907974 | 4.1194277 | 6.10E-137 | 2.40E-133 | Pericytes                    |
| Cygb     | 24.681223 | 6.2386165 | 1.70E-134 | 5.57E-131 | Pericytes                    |
| Col4a1   | 24.483109 | 4.640808  | 2.24E-132 | 6.28E-129 | Pericytes                    |
| Gm13889  | 24.203682 | 5.70721   | 2.03E-129 | 5.00E-126 | Pericytes                    |
| Rarres2  | 23.866814 | 4.7903886 | 6.78E-126 | 1.48E-122 | Pericytes                    |
| 4-Sep    | 23.407127 | 5.54353   | 3.62E-121 | 7.11E-118 | Pericytes                    |
| Col4a2   | 23.121704 | 3.977938  | 2.80E-118 | 5.00E-115 | Pericytes                    |
| Cald1    | 22.985682 | 3.393512  | 6.48E-117 | 1.06E-113 | Pericytes                    |
| Mcam     | 22.893688 | 4.45857   | 5.37E-116 | 8.12E-113 | Pericytes                    |
| Notch3   | 22.76777  | 5.6506968 | 9.57E-115 | 1.34E-111 | Pericytes                    |
| Rasgrp2  | 22.438423 | 4.614568  | 1.66E-111 | 2.18E-108 | Pericytes                    |
| Itga1    | 22.27364  | 4.617569  | 6.66E-110 | 8.18E-107 | Pericytes                    |
| Igfbp7   | 22.244413 | 4.595246  | 1.28E-109 | 1.48E-106 | Pericytes                    |
| Ndufa4l2 | 22.206507 | 5.678251  | 2.97E-109 | 3.24E-106 | Pericytes                    |
| Lamb1    | 22.181274 | 3.5580478 | 5.21E-109 | 5.39E-106 | Pericytes                    |
| Ifitm3   | 21.685986 | 3.2405834 | 2.78E-104 | 2.73E-101 | Pericytes                    |
| Abcc9    | 21.519659 | 4.930246  | 1.02E-102 | 9.54E-100 | Pericytes                    |
| Nid2     | 21.447367 | 3.754792  | 4.83E-102 | 4.32E-99  | Pericytes                    |
| Gjc1     | 21.33381  | 3.738762  | 5.51E-101 | 4.71E-98  | Pericytes                    |
| Gcnt2    | 21.190289 | 5.2124085 | 1.17E-99  | 9.61E-97  | Pericytes                    |
| Art3     | 20.99857  | 7.546938  | 6.76E-98  | 5.31E-95  | Pericytes                    |
| Phlda1   | 20.779444 | 4.731678  | 6.64E-96  | 5.02E-93  | Pericytes                    |
| Gucy1a1  | 20.611944 | 4.6607337 | 2.14E-94  | 1.56E-91  | Pericytes                    |
| Epas1    | 20.470669 | 4.07041   | 3.93E-93  | 2.76E-90  | Pericytes                    |
| Cbfa2t3  | 20.423689 | 4.465081  | 1.03E-92  | 6.98E-90  | Pericytes                    |

|               |           |           |           |           |                             |
|---------------|-----------|-----------|-----------|-----------|-----------------------------|
| Ifitm1        | 20.38058  | 3.4828548 | 2.49E-92  | 1.63E-89  | Pericytes                   |
| Tns1          | 20.37263  | 4.09165   | 2.93E-92  | 1.85E-89  | Pericytes                   |
| Nid1          | 20.159008 | 3.3489168 | 2.24E-90  | 1.38E-87  | Pericytes                   |
| Fabp7         | 19.742086 | 4.656515  | 9.38E-87  | 5.59E-84  | Pericytes                   |
| Cspg4         | 19.540178 | 5.5744104 | 5.00E-85  | 2.89E-82  | Pericytes                   |
| Lhfp          | 19.288683 | 4.540321  | 6.69E-83  | 3.75E-80  | Pericytes                   |
| Bgn           | 19.246437 | 3.3075037 | 1.51E-82  | 8.25E-80  | Pericytes                   |
| Ggt5          | 19.139992 | 6.2746315 | 1.17E-81  | 6.23E-79  | Pericytes                   |
| Tgfb2         | 19.11884  | 4.070555  | 1.76E-81  | 9.10E-79  | Pericytes                   |
| Fn1           | 19.114653 | 3.4335558 | 1.91E-81  | 9.61E-79  | Pericytes                   |
| Mfge8         | 19.0359   | 3.3545012 | 8.60E-81  | 4.23E-78  | Pericytes                   |
| Zeb2          | 19.012377 | 3.3456268 | 1.35E-80  | 6.46E-78  | Pericytes                   |
| Axl           | 18.839672 | 3.8952353 | 3.57E-79  | 1.63E-76  | Pericytes                   |
| Id3           | 18.827648 | 2.6355486 | 4.48E-79  | 2.00E-76  | Pericytes                   |
| Foxf1         | 18.824963 | 3.5625083 | 4.72E-79  | 2.06E-76  | Pericytes                   |
| Ednra         | 18.748598 | 5.130908  | 1.99E-78  | 8.49E-76  | Pericytes                   |
| Tmem176a      | 18.136272 | 2.5699399 | 1.65E-73  | 6.89E-71  | Pericytes                   |
| Slc12a2       | 18.012678 | 3.7717693 | 1.55E-72  | 6.21E-70  | Pericytes                   |
| Spon2         | 17.635916 | 5.6547647 | 1.31E-69  | 5.13E-67  | Pericytes                   |
| Kcnj8         | 17.492441 | 4.162304  | 1.64E-68  | 6.30E-66  | Pericytes                   |
| Des           | 17.491371 | 3.5170844 | 1.67E-68  | 6.30E-66  | Pericytes                   |
| Meis2         | 49.51553  | 3.6113727 | 0         | 0         | Colonic mesenchymal cells-1 |
| Mdk           | 42.37892  | 2.8566587 | 0         | 0         | Colonic mesenchymal cells-1 |
| Fbn2          | 42.292976 | 3.2173364 | 0         | 0         | Colonic mesenchymal cells-1 |
| Mab21l2       | 42.01252  | 3.4253073 | 0         | 0         | Colonic mesenchymal cells-1 |
| Tshz2         | 41.736526 | 2.7828603 | 0         | 0         | Colonic mesenchymal cells-1 |
| Atxn7l3b      | 40.46149  | 2.060923  | 0         | 0         | Colonic mesenchymal cells-1 |
| Tcf21         | 40.279915 | 3.448098  | 0         | 0         | Colonic mesenchymal cells-1 |
| Fst           | 40.24272  | 5.7438073 | 0         | 0         | Colonic mesenchymal cells-1 |
| Tgfbi         | 40.096043 | 3.3845325 | 0         | 0         | Colonic mesenchymal cells-1 |
| Igfbp5        | 39.35987  | 3.3307352 | 0         | 0         | Colonic mesenchymal cells-1 |
| Ptn           | 38.75091  | 3.189411  | 0         | 0         | Colonic mesenchymal cells-1 |
| Isoc1         | 38.10058  | 3.0061903 | 0         | 0         | Colonic mesenchymal cells-1 |
| Igfbp2        | 37.78928  | 3.2576354 | 0         | 0         | Colonic mesenchymal cells-1 |
| Nnat          | 37.53502  | 2.8263543 | 2.47E-308 | 3.47E-305 | Colonic mesenchymal cells-1 |
| Basp1         | 37.047348 | 2.3811445 | 1.98E-300 | 2.60E-297 | Colonic mesenchymal cells-1 |
| Sox11         | 36.83415  | 2.6913192 | 5.25E-297 | 6.44E-294 | Colonic mesenchymal cells-1 |
| 6330403K07Rik | 36.33355  | 2.7758453 | 4.78E-289 | 5.53E-286 | Colonic mesenchymal cells-1 |
| Hoxd9         | 35.720924 | 5.6485133 | 1.87E-279 | 2.04E-276 | Colonic mesenchymal cells-1 |
| Nfib          | 35.492996 | 2.2245293 | 6.30E-276 | 6.52E-273 | Colonic mesenchymal cells-1 |
| Meg3          | 35.332664 | 3.0499315 | 1.85E-273 | 1.82E-270 | Colonic mesenchymal cells-1 |
| Mfap2         | 35.048496 | 2.256027  | 4.11E-269 | 3.85E-266 | Colonic mesenchymal cells-1 |
| Gas1          | 34.920128 | 2.6008823 | 3.68E-267 | 3.29E-264 | Colonic mesenchymal cells-1 |
| Meis1         | 34.624065 | 2.4966612 | 1.10E-262 | 9.38E-260 | Colonic mesenchymal cells-1 |
| Hoxa10        | 34.002167 | 5.6286407 | 2.07E-253 | 1.69E-250 | Colonic mesenchymal cells-1 |
| Pbx1          | 33.779434 | 2.2181537 | 3.95E-250 | 3.11E-247 | Colonic mesenchymal cells-1 |
| Gpc3          | 31.730356 | 2.075876  | 5.93E-221 | 4.48E-218 | Colonic mesenchymal cells-1 |

|          |           |            |           |           |                             |
|----------|-----------|------------|-----------|-----------|-----------------------------|
| Smoc2    | 31.084194 | 2.8581443  | 3.94E-212 | 2.87E-209 | Colonic mesenchymal cells-1 |
| Lgals1   | 31.004183 | 2.2127454  | 4.73E-211 | 3.32E-208 | Colonic mesenchymal cells-1 |
| Cdkn1c   | 30.94993  | 2.0207891  | 2.55E-210 | 1.73E-207 | Colonic mesenchymal cells-1 |
| Hoxd10   | 30.93751  | 6.6146946  | 3.74E-210 | 2.45E-207 | Colonic mesenchymal cells-1 |
| Col3a1   | 30.746174 | 2.4121797  | 1.38E-207 | 8.45E-205 | Colonic mesenchymal cells-1 |
| Mfap4    | 30.640007 | 2.2830148  | 3.59E-206 | 2.14E-203 | Colonic mesenchymal cells-1 |
| Zfhx3    | 30.26783  | 2.1814907  | 3.04E-201 | 1.76E-198 | Colonic mesenchymal cells-1 |
| Lsp1     | 29.838255 | 2.3974082  | 1.25E-195 | 7.00E-193 | Colonic mesenchymal cells-1 |
| Chd3     | 29.566975 | 1.9532949  | 3.97E-192 | 2.17E-189 | Colonic mesenchymal cells-1 |
| Zfhx4    | 28.936089 | 2.589001   | 4.20E-184 | 2.23E-181 | Colonic mesenchymal cells-1 |
| Clmp     | 28.77396  | 2.843177   | 4.54E-182 | 2.35E-179 | Colonic mesenchymal cells-1 |
| Tpm1     | 28.363766 | 1.6563262  | 5.66E-177 | 2.85E-174 | Colonic mesenchymal cells-1 |
| H2afy2   | 28.315477 | 2.0045216  | 2.23E-176 | 1.09E-173 | Colonic mesenchymal cells-1 |
| H2afv    | 27.949804 | 1.4803782  | 6.63E-172 | 3.18E-169 | Colonic mesenchymal cells-1 |
| Cdh11    | 27.80729  | 2.220307   | 3.54E-170 | 1.66E-167 | Colonic mesenchymal cells-1 |
| Hmgn1    | 27.636677 | 1.2910414  | 4.04E-168 | 1.84E-165 | Colonic mesenchymal cells-1 |
| Hoxd11   | 27.60816  | 6.6915894  | 8.88E-168 | 3.97E-165 | Colonic mesenchymal cells-1 |
| Ldhb     | 27.550432 | 2.06493    | 4.37E-167 | 1.91E-164 | Colonic mesenchymal cells-1 |
| Rnd3     | 27.429487 | 2.6180859  | 1.22E-165 | 5.21E-163 | Colonic mesenchymal cells-1 |
| Tceal9   | 27.237625 | 1.3037452  | 2.33E-163 | 9.74E-161 | Colonic mesenchymal cells-1 |
| H3f3b    | 27.075947 | 0.89768666 | 1.89E-161 | 7.74E-159 | Colonic mesenchymal cells-1 |
| Myl9     | 26.967001 | 2.1291196  | 3.60E-160 | 1.45E-157 | Colonic mesenchymal cells-1 |
| Foxf1    | 26.960402 | 2.6459544  | 4.31E-160 | 1.69E-157 | Colonic mesenchymal cells-1 |
| Col1a1   | 26.77577  | 1.9178876  | 6.19E-158 | 2.39E-155 | Colonic mesenchymal cells-1 |
| Col14a1  | 30.992035 | 4.1594977  | 6.90E-211 | 1.36E-206 | Colonic mesenchymal cells-2 |
| Lum      | 30.690897 | 4.0102706  | 7.53E-207 | 7.40E-203 | Colonic mesenchymal cells-2 |
| Mfap4    | 29.977705 | 3.470011   | 1.92E-197 | 1.26E-193 | Colonic mesenchymal cells-2 |
| Tcf21    | 29.959522 | 3.615165   | 3.31E-197 | 1.62E-193 | Colonic mesenchymal cells-2 |
| Ifitm1   | 29.445429 | 3.347466   | 1.44E-190 | 5.66E-187 | Colonic mesenchymal cells-2 |
| Lgals1   | 28.8175   | 2.9759526  | 1.29E-182 | 4.24E-179 | Colonic mesenchymal cells-2 |
| Col1a1   | 28.618546 | 3.653225   | 3.95E-180 | 1.11E-176 | Colonic mesenchymal cells-2 |
| Col3a1   | 28.601568 | 3.709616   | 6.42E-180 | 1.58E-176 | Colonic mesenchymal cells-2 |
| Sfrp1    | 28.2453   | 3.5576887  | 1.63E-175 | 3.55E-172 | Colonic mesenchymal cells-2 |
| Snai2    | 28.028715 | 4.0403705  | 7.26E-173 | 1.43E-169 | Colonic mesenchymal cells-2 |
| Cd63     | 27.622112 | 2.202051   | 6.04E-168 | 1.08E-164 | Colonic mesenchymal cells-2 |
| Cald1    | 27.516214 | 2.6087236  | 1.12E-166 | 1.84E-163 | Colonic mesenchymal cells-2 |
| Colec10  | 27.45542  | 6.326544   | 5.99E-166 | 9.05E-163 | Colonic mesenchymal cells-2 |
| Mab21l2  | 27.27662  | 3.1595187  | 8.03E-164 | 1.13E-160 | Colonic mesenchymal cells-2 |
| Col6a1   | 26.595074 | 2.8454726  | 7.74E-156 | 1.01E-152 | Colonic mesenchymal cells-2 |
| Col1a2   | 26.320919 | 3.0806375  | 1.11E-152 | 1.36E-149 | Colonic mesenchymal cells-2 |
| Adamdec1 | 25.41016  | 5.4823866  | 1.95E-142 | 2.25E-139 | Colonic mesenchymal cells-2 |
| Rgs5     | 25.401716 | 4.672331   | 2.41E-142 | 2.53E-139 | Colonic mesenchymal cells-2 |
| Tgfb1    | 25.40125  | 2.9395535  | 2.44E-142 | 2.53E-139 | Colonic mesenchymal cells-2 |
| Mdk      | 25.366533 | 2.5595465  | 5.90E-142 | 5.80E-139 | Colonic mesenchymal cells-2 |
| Lsp1     | 24.800112 | 2.7874513  | 8.94E-136 | 8.37E-133 | Colonic mesenchymal cells-2 |
| Foxf1    | 24.713959 | 3.08812    | 7.57E-135 | 6.76E-132 | Colonic mesenchymal cells-2 |
| Zeb2     | 24.435768 | 2.6210082  | 7.13E-132 | 6.09E-129 | Colonic mesenchymal cells-2 |

|          |            |           |           |           |                             |
|----------|------------|-----------|-----------|-----------|-----------------------------|
| Gpc3     | 24.332596  | 2.333367  | 8.86E-131 | 7.26E-128 | Colonic mesenchymal cells-2 |
| Ccnd2    | 24.322754  | 2.3558576 | 1.13E-130 | 8.85E-128 | Colonic mesenchymal cells-2 |
| Gpc6     | 24.293583  | 3.6837223 | 2.29E-130 | 1.73E-127 | Colonic mesenchymal cells-2 |
| Ppp1r14a | 24.2547    | 3.3945017 | 5.90E-130 | 4.29E-127 | Colonic mesenchymal cells-2 |
| Atxn7l3b | 24.225775  | 1.8018101 | 1.19E-129 | 8.36E-127 | Colonic mesenchymal cells-2 |
| Col6a2   | 24.159847  | 2.686757  | 5.88E-129 | 3.99E-126 | Colonic mesenchymal cells-2 |
| Pdgfra   | 23.741455  | 3.6719182 | 1.35E-124 | 8.82E-122 | Colonic mesenchymal cells-2 |
| Pkdcc    | 23.641726  | 3.0054967 | 1.44E-123 | 9.10E-121 | Colonic mesenchymal cells-2 |
| Olfml3   | 23.539682  | 2.737628  | 1.60E-122 | 9.83E-120 | Colonic mesenchymal cells-2 |
| Gucy1b1  | 23.419348  | 3.3960054 | 2.71E-121 | 1.62E-118 | Colonic mesenchymal cells-2 |
| Fibin    | 23.176735  | 4.542821  | 7.82E-119 | 4.52E-116 | Colonic mesenchymal cells-2 |
| Rcn3     | 22.99613   | 2.233363  | 5.10E-117 | 2.86E-114 | Colonic mesenchymal cells-2 |
| H2afy2   | 22.906551  | 2.2829313 | 4.00E-116 | 2.18E-113 | Colonic mesenchymal cells-2 |
| Dcn      | 22.864828  | 2.8346004 | 1.04E-115 | 5.53E-113 | Colonic mesenchymal cells-2 |
| Ogn      | 22.657442  | 3.4887078 | 1.18E-113 | 6.09E-111 | Colonic mesenchymal cells-2 |
| Vcan     | 22.543646  | 2.668179  | 1.55E-112 | 7.81E-110 | Colonic mesenchymal cells-2 |
| Fn1      | 22.477034  | 2.4174552 | 6.96E-112 | 3.42E-109 | Colonic mesenchymal cells-2 |
| Serpinh1 | 22.294899  | 1.8565792 | 4.14E-110 | 1.98E-107 | Colonic mesenchymal cells-2 |
| Gucy1a1  | 22.191479  | 3.2779431 | 4.15E-109 | 1.94E-106 | Colonic mesenchymal cells-2 |
| Meis2    | 22.01022   | 2.189643  | 2.30E-107 | 1.05E-104 | Colonic mesenchymal cells-2 |
| Acta2    | 21.50567   | 2.4031699 | 1.38E-102 | 6.15E-100 | Colonic mesenchymal cells-2 |
| Cdh11    | 21.496775  | 2.3703198 | 1.67E-102 | 7.29E-100 | Colonic mesenchymal cells-2 |
| Fbln1    | 21.327356  | 2.0838077 | 6.33E-101 | 2.70E-98  | Colonic mesenchymal cells-2 |
| Rcn1     | 21.08531   | 2.0300753 | 1.09E-98  | 4.44E-96  | Colonic mesenchymal cells-2 |
| Nkx2-3   | 20.983782  | 2.202569  | 9.23E-98  | 3.70E-95  | Colonic mesenchymal cells-2 |
| Mfap2    | 20.96568   | 1.962706  | 1.35E-97  | 5.31E-95  | Colonic mesenchymal cells-2 |
| Hmgn1    | 20.630596  | 1.3940287 | 1.46E-94  | 5.62E-92  | Colonic mesenchymal cells-2 |
| Adamdec1 | 14.214449  | 8.369211  | 7.45E-46  | 1.46E-41  | Tmem176a+ cells             |
| Tmem176a | 14.163879  | 5.040193  | 1.53E-45  | 1.51E-41  | Tmem176a+ cells             |
| Tmem176b | 13.8991375 | 4.396839  | 6.41E-44  | 4.20E-40  | Tmem176a+ cells             |
| Col6a4   | 13.74352   | 9.505418  | 5.57E-43  | 2.74E-39  | Tmem176a+ cells             |
| Gm13889  | 13.52374   | 5.934609  | 1.13E-41  | 4.05E-38  | Tmem176a+ cells             |
| Col6a1   | 13.517305  | 4.775067  | 1.24E-41  | 4.05E-38  | Tmem176a+ cells             |
| Malat1   | 13.166081  | 3.3361597 | 1.38E-39  | 3.86E-36  | Tmem176a+ cells             |
| Plpp3    | 12.876387  | 5.0059085 | 6.11E-38  | 1.50E-34  | Tmem176a+ cells             |
| Ptch1    | 12.614443  | 5.0776424 | 1.76E-36  | 3.84E-33  | Tmem176a+ cells             |
| Lamb1    | 12.199491  | 3.479922  | 3.13E-34  | 5.80E-31  | Tmem176a+ cells             |
| Lama5    | 12.196527  | 6.0181413 | 3.24E-34  | 5.80E-31  | Tmem176a+ cells             |
| Col6a2   | 11.927069  | 4.104745  | 8.55E-33  | 1.40E-29  | Tmem176a+ cells             |
| Ifitm3   | 11.720597  | 3.2346668 | 1.00E-31  | 1.51E-28  | Tmem176a+ cells             |
| AW112010 | 11.630608  | 6.2180257 | 2.88E-31  | 4.04E-28  | Tmem176a+ cells             |
| Aldh1a3  | 11.51101   | 8.747937  | 1.16E-30  | 1.52E-27  | Tmem176a+ cells             |
| Foxf1    | 11.273899  | 4.31611   | 1.77E-29  | 2.17E-26  | Tmem176a+ cells             |
| Col18a1  | 10.986155  | 3.69019   | 4.46E-28  | 5.15E-25  | Tmem176a+ cells             |
| Tgfb1    | 10.964802  | 4.470023  | 5.64E-28  | 6.16E-25  | Tmem176a+ cells             |
| Pten     | 10.830628  | 3.408931  | 2.46E-27  | 2.31E-24  | Tmem176a+ cells             |
| Nkx2-3   | 10.759071  | 3.4067073 | 5.37E-27  | 4.80E-24  | Tmem176a+ cells             |

|         |           |            |          |          |                                    |
|---------|-----------|------------|----------|----------|------------------------------------|
| Bgn     | 10.731783 | 3.7262146  | 7.22E-27 | 6.17E-24 | Tmem176a+ cells                    |
| Tpm1    | 10.645919 | 2.8900406  | 1.82E-26 | 1.38E-23 | Tmem176a+ cells                    |
| Ifitm1  | 10.599764 | 3.6264734  | 2.99E-26 | 2.17E-23 | Tmem176a+ cells                    |
| Pdgfra  | 10.553733 | 5.5359735  | 4.88E-26 | 3.41E-23 | Tmem176a+ cells                    |
| Nid1    | 10.542481 | 3.2425482  | 5.50E-26 | 3.60E-23 | Tmem176a+ cells                    |
| Bmp4    | 10.516327 | 5.314901   | 7.27E-26 | 4.61E-23 | Tmem176a+ cells                    |
| Foxf2   | 10.399313 | 6.58673    | 2.50E-25 | 1.49E-22 | Tmem176a+ cells                    |
| mt-Cytb | 10.393878 | 1.0272892  | 2.64E-25 | 1.53E-22 | Tmem176a+ cells                    |
| Lgmn    | 10.353432 | 3.3604872  | 4.04E-25 | 2.27E-22 | Tmem176a+ cells                    |
| Col1a2  | 10.327357 | 3.3793235  | 5.30E-25 | 2.89E-22 | Tmem176a+ cells                    |
| Igfbp7  | 10.303835 | 3.2004547  | 6.77E-25 | 3.50E-22 | Tmem176a+ cells                    |
| Hhip    | 10.088512 | 7.624265   | 6.21E-24 | 2.98E-21 | Tmem176a+ cells                    |
| Pla2g4a | 10.080806 | 4.7744503  | 6.72E-24 | 3.14E-21 | Tmem176a+ cells                    |
| 4-Sep   | 10.060891 | 4.689889   | 8.23E-24 | 3.76E-21 | Tmem176a+ cells                    |
| Cebpd   | 10.044651 | 4.1808815  | 9.70E-24 | 4.33E-21 | Tmem176a+ cells                    |
| Npnt    | 9.878523  | 5.83122    | 5.16E-23 | 2.16E-20 | Tmem176a+ cells                    |
| Txnip   | 9.77443   | 2.623941   | 1.45E-22 | 5.81E-20 | Tmem176a+ cells                    |
| Col6a3  | 9.644387  | 3.8420525  | 5.19E-22 | 2.00E-19 | Tmem176a+ cells                    |
| Meg3    | 9.603405  | 3.2581747  | 7.73E-22 | 2.92E-19 | Tmem176a+ cells                    |
| Myh9    | 9.49659   | 2.644387   | 2.17E-21 | 7.61E-19 | Tmem176a+ cells                    |
| Itgb1   | 9.442357  | 2.0090888  | 3.64E-21 | 1.19E-18 | Tmem176a+ cells                    |
| Lhfp    | 9.239886  | 4.068866   | 2.47E-20 | 7.58E-18 | Tmem176a+ cells                    |
| Pros1   | 9.145848  | 4.993562   | 5.92E-20 | 1.74E-17 | Tmem176a+ cells                    |
| Tnc     | 9.128705  | 5.3123045  | 6.93E-20 | 2.00E-17 | Tmem176a+ cells                    |
| Ghr     | 9.09464   | 3.0651472  | 9.49E-20 | 2.70E-17 | Tmem176a+ cells                    |
| Gpx3    | 8.912282  | 3.1340992  | 5.00E-19 | 1.29E-16 | Tmem176a+ cells                    |
| Col5a1  | 8.857502  | 2.7933683  | 8.18E-19 | 2.09E-16 | Tmem176a+ cells                    |
| Bmp5    | 8.824468  | 6.6443024  | 1.10E-18 | 2.77E-16 | Tmem176a+ cells                    |
| Plac8   | 8.745874  | 3.0855193  | 2.21E-18 | 5.50E-16 | Tmem176a+ cells                    |
| Cebpb   | 8.68175   | 2.8032296  | 3.90E-18 | 9.15E-16 | Tmem176a+ cells                    |
| mt-Nd4l | 82.83756  | 2.6259253  | 0        | 0        | Undifferentiated endothelial cells |
| Tmsb10  | 78.873764 | 1.4938555  | 0        | 0        | Undifferentiated endothelial cells |
| Gm42418 | 75.4467   | 1.9576218  | 0        | 0        | Undifferentiated endothelial cells |
| Tmsb4x  | 73.941925 | 1.2967736  | 0        | 0        | Undifferentiated endothelial cells |
| Gnas    | 73.56396  | 1.483446   | 0        | 0        | Undifferentiated endothelial cells |
| Mest    | 67.66803  | 2.3645527  | 0        | 0        | Undifferentiated endothelial cells |
| Actb    | 65.2704   | 1.0742474  | 0        | 0        | Undifferentiated endothelial cells |
| mt-Nd2  | 63.90755  | 0.8753704  | 0        | 0        | Undifferentiated endothelial cells |
| Fabp5   | 62.57754  | 2.2761815  | 0        | 0        | Undifferentiated endothelial cells |
| Fkbp1a  | 61.861866 | 1.5665957  | 0        | 0        | Undifferentiated endothelial cells |
| Ppia    | 60.914215 | 0.71327484 | 0        | 0        | Undifferentiated endothelial cells |
| Actg1   | 58.29407  | 0.8549969  | 0        | 0        | Undifferentiated endothelial cells |
| Vim     | 58.13862  | 1.739398   | 0        | 0        | Undifferentiated endothelial cells |
| mt-Atp6 | 57.590267 | 0.6965734  | 0        | 0        | Undifferentiated endothelial cells |
| Pfn1    | 57.19869  | 0.95856416 | 0        | 0        | Undifferentiated endothelial cells |
| mt-Nd5  | 51.870167 | 0.9219526  | 0        | 0        | Undifferentiated endothelial cells |
| Gng11   | 51.751644 | 2.2497587  | 0        | 0        | Undifferentiated endothelial cells |

|          |           |            |                      |           |                                    |
|----------|-----------|------------|----------------------|-----------|------------------------------------|
| Gnai2    | 51.51373  | 1.2380847  | 0                    | 0         | Undifferentiated endothelial cells |
| Cfl1     | 51.18317  | 0.7789835  | 0                    | 0         | Undifferentiated endothelial cells |
| Tagln2   | 49.27014  | 1.6057245  | 0                    | 0         | Undifferentiated endothelial cells |
| mt-Nd4   | 49.21613  | 0.6376001  | 0                    | 0         | Undifferentiated endothelial cells |
| Hbb-y    | 47.992954 | 2.8816113  | 0                    | 0         | Undifferentiated endothelial cells |
| mt-Co3   | 47.03551  | 0.56097454 | 0                    | 0         | Undifferentiated endothelial cells |
| S100a16  | 46.18638  | 2.220543   | 0                    | 0         | Undifferentiated endothelial cells |
| Crip2    | 45.541252 | 2.0035799  | 0                    | 0         | Undifferentiated endothelial cells |
| Ptma     | 44.502876 | 0.64303625 | 0                    | 0         | Undifferentiated endothelial cells |
| Ran      | 43.338406 | 0.91955477 | 0                    | 0         | Undifferentiated endothelial cells |
| Fabp4    | 43.214073 | 2.3756166  | 0                    | 0         | Undifferentiated endothelial cells |
| Calm1    | 43.084953 | 0.7526446  | 0                    | 0         | Undifferentiated endothelial cells |
| mt-Nd1   | 42.5368   | 0.56760716 | 0                    | 0         | Undifferentiated endothelial cells |
| Dynll1   | 42.394352 | 0.76259303 | 0                    | 0         | Undifferentiated endothelial cells |
| mt-Co2   | 40.25813  | 0.46933395 | 0                    | 0         | Undifferentiated endothelial cells |
| Gng5     | 39.38165  | 0.44480553 | 0                    | 0         | Undifferentiated endothelial cells |
| H2afz    | 38.197598 | 0.79098094 | 0                    | 0         | Undifferentiated endothelial cells |
| Tubb5    | 37.960922 | 0.8538713  | 0                    | 0         | Undifferentiated endothelial cells |
| Eif5a    | 37.62533  | 0.7472813  | 8.2845677179555e-310 | 9.63E-308 | Undifferentiated endothelial cells |
| Hspa8    | 37.295937 | 0.44171816 | 1.91E-304            | 2.14E-302 | Undifferentiated endothelial cells |
| Tcf15    | 36.854313 | 2.9452744  | 2.49E-297            | 2.57E-295 | Undifferentiated endothelial cells |
| Hsp90ab1 | 34.607334 | 0.5474333  | 1.96E-262            | 1.42E-260 | Undifferentiated endothelial cells |
| Tpm4     | 34.570026 | 1.0931448  | 7.13E-262            | 5.11E-260 | Undifferentiated endothelial cells |
| Ramp2    | 34.12096  | 1.5973027  | 3.61E-255            | 2.39E-253 | Undifferentiated endothelial cells |
| mt-Cytb  | 33.40779  | 0.39525375 | 1.06E-244            | 6.20E-243 | Undifferentiated endothelial cells |
| Rps6     | 32.807667 | 0.33575132 | 4.58E-236            | 2.43E-234 | Undifferentiated endothelial cells |
| Plvap    | 32.326283 | 1.5622653  | 2.99E-229            | 1.47E-227 | Undifferentiated endothelial cells |
| Prdx1    | 32.306095 | 0.39639595 | 5.74E-229            | 2.80E-227 | Undifferentiated endothelial cells |
| Nes      | 31.804855 | 2.3313777  | 5.55E-222            | 2.51E-220 | Undifferentiated endothelial cells |
| Icam2    | 31.396496 | 2.2078125  | 2.26E-216            | 9.57E-215 | Undifferentiated endothelial cells |
| Rbp1     | 31.189423 | 1.1635487  | 1.48E-213            | 6.07E-212 | Undifferentiated endothelial cells |
| Rps2     | 30.66677  | 0.39054313 | 1.58E-206            | 6.06E-205 | Undifferentiated endothelial cells |
| Eif4a1   | 29.760569 | 0.34567103 | 1.27E-194            | 4.32E-193 | Undifferentiated endothelial cells |
| Cdh5     | 54.905457 | 3.900877   | 0                    | 0         | Transitioning endothelial cells    |
| Icam2    | 53.713192 | 3.765203   | 0                    | 0         | Transitioning endothelial cells    |
| Egfl7    | 53.553642 | 3.7762299  | 0                    | 0         | Transitioning endothelial cells    |
| Cldn5    | 53.43777  | 4.0260377  | 0                    | 0         | Transitioning endothelial cells    |
| Eccscr   | 51.89413  | 3.424478   | 0                    | 0         | Transitioning endothelial cells    |
| Mest     | 51.51567  | 2.8511584  | 0                    | 0         | Transitioning endothelial cells    |
| Emcn     | 50.444893 | 3.5495138  | 0                    | 0         | Transitioning endothelial cells    |
| Esam     | 50.277508 | 3.3551679  | 0                    | 0         | Transitioning endothelial cells    |
| Col18a1  | 50.058765 | 3.2571363  | 0                    | 0         | Transitioning endothelial cells    |
| S100a16  | 49.530006 | 2.929165   | 0                    | 0         | Transitioning endothelial cells    |
| Plxnd1   | 49.361626 | 3.1228356  | 0                    | 0         | Transitioning endothelial cells    |
| Pecam1   | 49.18656  | 3.270362   | 0                    | 0         | Transitioning endothelial cells    |
| Ramp2    | 49.041542 | 3.0285213  | 0                    | 0         | Transitioning endothelial cells    |
| Fkbp1a   | 48.95607  | 1.9730138  | 0                    | 0         | Transitioning endothelial cells    |

|          |           |            |           |           |                                 |
|----------|-----------|------------|-----------|-----------|---------------------------------|
| Cd93     | 47.739307 | 3.2172563  | 0         | 0         | Transitioning endothelial cells |
| Gnas     | 47.6722   | 1.7099848  | 0         | 0         | Transitioning endothelial cells |
| Kdr      | 46.79413  | 2.946396   | 0         | 0         | Transitioning endothelial cells |
| Tcf15    | 46.464916 | 3.4374392  | 0         | 0         | Transitioning endothelial cells |
| Gng11    | 46.383247 | 2.7484345  | 0         | 0         | Transitioning endothelial cells |
| Lmo2     | 45.832577 | 3.0024333  | 0         | 0         | Transitioning endothelial cells |
| Gnai2    | 45.760315 | 1.8273051  | 0         | 0         | Transitioning endothelial cells |
| Plvap    | 45.454247 | 2.9033084  | 0         | 0         | Transitioning endothelial cells |
| Crip2    | 45.002583 | 2.671287   | 0         | 0         | Transitioning endothelial cells |
| Ccdc85b  | 44.109524 | 2.6499732  | 0         | 0         | Transitioning endothelial cells |
| Col4a1   | 43.76719  | 2.6705616  | 0         | 0         | Transitioning endothelial cells |
| Vamp5    | 43.6589   | 2.8657465  | 0         | 0         | Transitioning endothelial cells |
| Cav1     | 43.600666 | 2.6968277  | 0         | 0         | Transitioning endothelial cells |
| Rasip1   | 42.978172 | 2.780279   | 0         | 0         | Transitioning endothelial cells |
| Flt1     | 42.937153 | 2.6838582  | 0         | 0         | Transitioning endothelial cells |
| Tmsb10   | 42.53384  | 1.3315324  | 0         | 0         | Transitioning endothelial cells |
| Gimap6   | 42.360344 | 2.8313203  | 0         | 0         | Transitioning endothelial cells |
| Aplnr    | 41.982147 | 3.3775086  | 0         | 0         | Transitioning endothelial cells |
| Col4a2   | 41.663963 | 2.4137697  | 0         | 0         | Transitioning endothelial cells |
| Col15a1  | 41.589764 | 2.809881   | 0         | 0         | Transitioning endothelial cells |
| Gimap1   | 41.52706  | 3.0529172  | 0         | 0         | Transitioning endothelial cells |
| Ctla2a   | 41.355106 | 2.7966852  | 0         | 0         | Transitioning endothelial cells |
| Tmsb4x   | 41.036835 | 1.195654   | 0         | 0         | Transitioning endothelial cells |
| Vim      | 40.796055 | 2.0341368  | 0         | 0         | Transitioning endothelial cells |
| Abhd17a  | 40.30944  | 1.9595733  | 0         | 0         | Transitioning endothelial cells |
| Tmem255a | 40.272327 | 3.3455956  | 0         | 0         | Transitioning endothelial cells |
| Actg1    | 39.700592 | 0.98435223 | 0         | 0         | Transitioning endothelial cells |
| Cd34     | 39.699265 | 2.5248199  | 0         | 0         | Transitioning endothelial cells |
| Plk2     | 39.37609  | 2.6757329  | 0         | 0         | Transitioning endothelial cells |
| Elk3     | 39.374786 | 2.4025235  | 0         | 0         | Transitioning endothelial cells |
| Bst2     | 39.318867 | 2.3693094  | 0         | 0         | Transitioning endothelial cells |
| Tie1     | 39.27626  | 2.706325   | 0         | 0         | Transitioning endothelial cells |
| Cavin3   | 39.266666 | 2.1709368  | 0         | 0         | Transitioning endothelial cells |
| Ralb     | 38.658554 | 1.9976398  | 0         | 0         | Transitioning endothelial cells |
| Eng      | 38.48788  | 2.2237732  | 0         | 0         | Transitioning endothelial cells |
| Tspan6   | 38.38377  | 2.1969264  | 0         | 0         | Transitioning endothelial cells |
| Vwf      | 31.569065 | 6.7315025  | 9.82E-219 | 1.93E-214 | Venous endothelial cells        |
| Cavin2   | 30.976673 | 5.0471425  | 1.11E-210 | 1.09E-206 | Venous endothelial cells        |
| Fabp4    | 30.851273 | 6.2342343  | 5.39E-209 | 3.53E-205 | Venous endothelial cells        |
| Ptprb    | 30.131538 | 5.2873454  | 1.87E-199 | 9.20E-196 | Venous endothelial cells        |
| Fbln2    | 29.88902  | 5.8806653  | 2.73E-196 | 1.07E-192 | Venous endothelial cells        |
| Eln      | 29.812563 | 6.211465   | 2.69E-195 | 8.80E-192 | Venous endothelial cells        |
| Cav1     | 29.792004 | 4.5716853  | 4.96E-195 | 1.39E-191 | Venous endothelial cells        |
| Calcr1   | 29.256126 | 5.2392254  | 3.75E-188 | 9.22E-185 | Venous endothelial cells        |
| Cldn5    | 29.250225 | 5.2254634  | 4.46E-188 | 9.74E-185 | Venous endothelial cells        |
| Ackr3    | 29.0636   | 5.7757154  | 1.04E-185 | 2.04E-182 | Venous endothelial cells        |
| Fbln5    | 28.926275 | 5.527806   | 5.58E-184 | 9.97E-181 | Venous endothelial cells        |



|                                                                                                                 |           |           |           |           |                            |
|-----------------------------------------------------------------------------------------------------------------|-----------|-----------|-----------|-----------|----------------------------|
| Aplnr                                                                                                           | 28.766838 | 4.726275  | 5.58E-182 | 9.13E-179 | Venous endothelial cells   |
| S100a10                                                                                                         | 28.617424 | 3.1448176 | 4.08E-180 | 6.17E-177 | Venous endothelial cells   |
| Cd9                                                                                                             | 27.864332 | 3.4708986 | 7.22E-171 | 1.01E-167 | Venous endothelial cells   |
| Cd36                                                                                                            | 27.496967 | 4.8059354 | 1.91E-166 | 2.50E-163 | Venous endothelial cells   |
| Ramp2                                                                                                           | 27.08062  | 3.627333  | 1.67E-161 | 2.05E-158 | Venous endothelial cells   |
| Fbn1                                                                                                            | 26.347012 | 3.8390353 | 5.55E-153 | 6.42E-150 | Venous endothelial cells   |
| Slc6a6                                                                                                          | 26.295628 | 3.7166717 | 2.15E-152 | 2.35E-149 | Venous endothelial cells   |
| Clec14a                                                                                                         | 26.215826 | 4.222568  | 1.75E-151 | 1.81E-148 | Venous endothelial cells   |
| Pecam1                                                                                                          | 26.188631 | 3.8331292 | 3.58E-151 | 3.52E-148 | Venous endothelial cells   |
| Procr                                                                                                           | 26.058512 | 5.19969   | 1.08E-149 | 1.01E-146 | Venous endothelial cells   |
| Iqgap1                                                                                                          | 26.036507 | 3.101217  | 1.91E-149 | 1.71E-146 | Venous endothelial cells   |
| Aqp1                                                                                                            | 25.992214 | 6.41198   | 6.06E-149 | 5.18E-146 | Venous endothelial cells   |
| Cavin1                                                                                                          | 25.885763 | 3.3406467 | 9.63E-148 | 7.89E-145 | Venous endothelial cells   |
| Aplp2                                                                                                           | 25.869457 | 2.7910938 | 1.47E-147 | 1.16E-144 | Venous endothelial cells   |
| Lbp                                                                                                             | 25.701311 | 5.0348177 | 1.13E-145 | 8.54E-143 | Venous endothelial cells   |
| Entpd1                                                                                                          | 25.647678 | 4.8109846 | 4.49E-145 | 3.27E-142 | Venous endothelial cells   |
| Ehd4                                                                                                            | 25.34424  | 3.7111263 | 1.04E-141 | 7.30E-139 | Venous endothelial cells   |
| Plvap                                                                                                           | 25.273867 | 3.986584  | 6.19E-141 | 4.20E-138 | Venous endothelial cells   |
| Egfl7                                                                                                           | 25.240908 | 3.6699665 | 1.43E-140 | 9.34E-138 | Venous endothelial cells   |
| Tie1                                                                                                            | 25.10752  | 3.675476  | 4.12E-139 | 2.61E-136 | Venous endothelial cells   |
| Foxp1                                                                                                           | 24.970613 | 2.9114444 | 1.28E-137 | 7.83E-135 | Venous endothelial cells   |
| Cdh5                                                                                                            | 24.938961 | 3.6013315 | 2.81E-137 | 1.68E-134 | Venous endothelial cells   |
| Ifitm3                                                                                                          | 24.870472 | 3.0374687 | 1.55E-136 | 8.72E-134 | Venous endothelial cells   |
| Txnip                                                                                                           | 24.870457 | 2.8345299 | 1.55E-136 | 8.72E-134 | Venous endothelial cells   |
| Palmd                                                                                                           | 24.869287 | 5.388723  | 1.60E-136 | 8.73E-134 | Venous endothelial cells   |
| Emcn                                                                                                            | 24.766588 | 3.7505097 | 2.05E-135 | 1.09E-132 | Venous endothelial cells   |
| Fstl1                                                                                                           | 24.510572 | 2.8577206 | 1.14E-132 | 5.89E-130 | Venous endothelial cells   |
| Klf2                                                                                                            | 24.44059  | 3.9600923 | 6.34E-132 | 3.19E-129 | Venous endothelial cells   |
| Rapgef5                                                                                                         | 24.436926 | 3.9926984 | 6.93E-132 | 3.41E-129 | Venous endothelial cells   |
| Itgb1                                                                                                           | 24.3569   | 2.405584  | 4.90E-131 | 2.35E-128 | Venous endothelial cells   |
| Crip2                                                                                                           | 24.109278 | 3.0246398 | 2.00E-128 | 9.35E-126 | Venous endothelial cells   |
| Utrn                                                                                                            | 24.02505  | 3.2488005 | 1.52E-127 | 6.96E-125 | Venous endothelial cells   |
| AU021092                                                                                                        | 23.918499 | 4.688472  | 1.97E-126 | 8.78E-124 | Venous endothelial cells   |
| Plxnd1                                                                                                          | 23.857826 | 3.1921856 | 8.40E-126 | 3.67E-123 | Venous endothelial cells   |
| H2-D1                                                                                                           | 23.80119  | 3.0926073 | 3.25E-125 | 1.39E-122 | Venous endothelial cells   |
| Ece1                                                                                                            | 23.707102 | 3.2333605 | 3.05E-124 | 1.25E-121 | Venous endothelial cells   |
| Jam2                                                                                                            | 23.70693  | 4.7859387 | 3.06E-124 | 1.25E-121 | Venous endothelial cells   |
| Lmo2                                                                                                            | 23.562134 | 3.2846014 | 9.43E-123 | 3.78E-120 | Venous endothelial cells   |
| S100a16                                                                                                         | 23.531479 | 2.9140692 | 1.94E-122 | 7.64E-120 | Venous endothelial cells   |
| Fbln5                                                                                                           | 23.534048 | 7.3221703 | 1.83E-122 | 3.59E-118 | Arterial endothelial cells |
| <td>22.699717</td> <td>5.5665154</td> <td>4.51E-114</td> <td>4.43E-110</td> <td>Arterial endothelial cells</td> | 22.699717 | 5.5665154 | 4.51E-114 | 4.43E-110 | Arterial endothelial cells |
| Tm4sf1                                                                                                          | 22.470411 | 5.443712  | 8.08E-112 | 5.30E-108 | Arterial endothelial cells |
| Ptprb                                                                                                           | 22.426718 | 5.2873693 | 2.16E-111 | 1.06E-107 | Arterial endothelial cells |
| Eln                                                                                                             | 21.736912 | 6.825557  | 9.19E-105 | 3.61E-101 | Arterial endothelial cells |
| Fstl1                                                                                                           | 21.533268 | 3.5279408 | 7.60E-103 | 2.49E-99  | Arterial endothelial cells |
| Sox17                                                                                                           | 20.890144 | 5.4899206 | 6.58E-97  | 1.85E-93  | Arterial endothelial cells |
| Gja5                                                                                                            | 20.790735 | 8.107904  | 5.25E-96  | 1.29E-92  | Arterial endothelial cells |

|         |           |           |           |           |                             |
|---------|-----------|-----------|-----------|-----------|-----------------------------|
| Cldn5   | 20.59594  | 4.918551  | 2.98E-94  | 6.52E-91  | Arterial endothelial cells  |
| Pecam1  | 20.418386 | 4.1724944 | 1.15E-92  | 2.26E-89  | Arterial endothelial cells  |
| Fbln2   | 20.3857   | 5.588142  | 2.24E-92  | 4.00E-89  | Arterial endothelial cells  |
| Ltbp4   | 20.328836 | 4.197796  | 7.15E-92  | 1.17E-88  | Arterial endothelial cells  |
| Epas1   | 20.296648 | 4.6423335 | 1.38E-91  | 2.08E-88  | Arterial endothelial cells  |
| Gja4    | 20.11792  | 5.4978547 | 5.14E-90  | 7.22E-87  | Arterial endothelial cells  |
| Jag1    | 20.102028 | 5.130797  | 7.08E-90  | 9.28E-87  | Arterial endothelial cells  |
| Mmnr2   | 19.527096 | 4.356726  | 6.46E-85  | 7.94E-82  | Arterial endothelial cells  |
| Ramp2   | 19.424377 | 3.6259181 | 4.80E-84  | 5.55E-81  | Arterial endothelial cells  |
| Vim     | 19.385536 | 2.8302274 | 1.02E-83  | 1.12E-80  | Arterial endothelial cells  |
| Cdh5    | 19.20068  | 3.81259   | 3.65E-82  | 3.78E-79  | Arterial endothelial cells  |
| Clec14a | 19.169867 | 4.3822846 | 6.61E-82  | 6.49E-79  | Arterial endothelial cells  |
| Vwf     | 19.067535 | 5.2421627 | 4.70E-81  | 4.40E-78  | Arterial endothelial cells  |
| Lmo2    | 18.947865 | 3.944684  | 4.60E-80  | 4.11E-77  | Arterial endothelial cells  |
| Edn1    | 18.659678 | 5.8344164 | 1.05E-77  | 9.00E-75  | Arterial endothelial cells  |
| Stmn2   | 18.518902 | 4.2592115 | 1.45E-76  | 1.19E-73  | Arterial endothelial cells  |
| Crip2   | 18.26731  | 3.1324344 | 1.51E-74  | 1.18E-71  | Arterial endothelial cells  |
| Cav1    | 18.261986 | 3.7627573 | 1.66E-74  | 1.26E-71  | Arterial endothelial cells  |
| Heg1    | 18.2091   | 3.8939555 | 4.37E-74  | 3.18E-71  | Arterial endothelial cells  |
| Trim47  | 17.911953 | 4.257567  | 9.51E-72  | 6.68E-69  | Arterial endothelial cells  |
| Cd93    | 17.907404 | 3.62426   | 1.03E-71  | 7.00E-69  | Arterial endothelial cells  |
| Klf2    | 17.8528   | 3.929023  | 2.75E-71  | 1.80E-68  | Arterial endothelial cells  |
| Itgb1   | 17.750233 | 2.3442461 | 1.72E-70  | 1.09E-67  | Arterial endothelial cells  |
| Mgp     | 17.674643 | 5.2323575 | 6.58E-70  | 4.04E-67  | Arterial endothelial cells  |
| Htra1   | 17.472239 | 6.207558  | 2.33E-68  | 1.39E-65  | Arterial endothelial cells  |
| Tie1    | 17.45735  | 3.7540443 | 3.03E-68  | 1.75E-65  | Arterial endothelial cells  |
| Mecom   | 17.450497 | 4.6320167 | 3.41E-68  | 1.92E-65  | Arterial endothelial cells  |
| Col18a1 | 17.435303 | 3.4182372 | 4.45E-68  | 2.43E-65  | Arterial endothelial cells  |
| Cavin2  | 17.411953 | 3.4433882 | 6.70E-68  | 3.56E-65  | Arterial endothelial cells  |
| Tek     | 17.284752 | 4.1877365 | 6.13E-67  | 3.17E-64  | Arterial endothelial cells  |
| Cavin1  | 17.068075 | 3.1563928 | 2.57E-65  | 1.29E-62  | Arterial endothelial cells  |
| Vegfc   | 17.036768 | 5.0733323 | 4.38E-65  | 2.15E-62  | Arterial endothelial cells  |
| Azin1   | 17.032894 | 3.5366488 | 4.68E-65  | 2.24E-62  | Arterial endothelial cells  |
| Iqgap1  | 16.959286 | 2.9364154 | 1.64E-64  | 7.69E-62  | Arterial endothelial cells  |
| Ehd2    | 16.951971 | 3.5234473 | 1.86E-64  | 8.51E-62  | Arterial endothelial cells  |
| Efnb2   | 16.935125 | 3.722077  | 2.48E-64  | 1.11E-61  | Arterial endothelial cells  |
| Icam2   | 16.790934 | 3.4831698 | 2.84E-63  | 1.24E-60  | Arterial endothelial cells  |
| Sox18   | 16.78344  | 3.4344432 | 3.23E-63  | 1.38E-60  | Arterial endothelial cells  |
| Ehd4    | 16.643688 | 3.3976142 | 3.36E-62  | 1.41E-59  | Arterial endothelial cells  |
| Sema3g  | 16.642004 | 6.427812  | 3.46E-62  | 1.42E-59  | Arterial endothelial cells  |
| Sparcl1 | 16.610897 | 3.0225127 | 5.81E-62  | 2.33E-59  | Arterial endothelial cells  |
| Ecscr   | 16.355072 | 3.1447413 | 4.00E-60  | 1.57E-57  | Arterial endothelial cells  |
| Mmnr1   | 38.78331  | 7.8837867 | 0         | 0         | Lymphatic endothelial cells |
| Cldn5   | 37.1719   | 5.0639377 | 1.94E-302 | 1.91E-298 | Lymphatic endothelial cells |
| Gnas    | 36.580715 | 2.256054  | 5.79E-293 | 3.80E-289 | Lymphatic endothelial cells |
| Klhl4   | 36.516953 | 5.4034023 | 5.97E-292 | 2.93E-288 | Lymphatic endothelial cells |
| Prox1   | 35.319645 | 7.473259  | 2.93E-273 | 1.15E-269 | Lymphatic endothelial cells |

|         |           |           |           |           |                             |
|---------|-----------|-----------|-----------|-----------|-----------------------------|
| Cavin2  | 35.190308 | 4.363723  | 2.81E-271 | 9.21E-268 | Lymphatic endothelial cells |
| Stab1   | 34.179245 | 4.2996764 | 4.92E-256 | 1.38E-252 | Lymphatic endothelial cells |
| Flt4    | 33.62374  | 4.81937   | 7.55E-248 | 1.85E-244 | Lymphatic endothelial cells |
| Col18a1 | 33.198704 | 3.554133  | 1.12E-241 | 2.45E-238 | Lymphatic endothelial cells |
| Gng11   | 32.876705 | 3.2402847 | 4.73E-237 | 9.30E-234 | Lymphatic endothelial cells |
| Thy1    | 32.873657 | 7.8902574 | 5.23E-237 | 9.35E-234 | Lymphatic endothelial cells |
| Eccscr  | 32.074493 | 3.5213256 | 1.00E-225 | 1.64E-222 | Lymphatic endothelial cells |
| Vim     | 31.345053 | 2.4815824 | 1.14E-215 | 1.72E-212 | Lymphatic endothelial cells |
| Egfl7   | 30.850811 | 3.4863691 | 5.46E-209 | 7.67E-206 | Lymphatic endothelial cells |
| Lyve1   | 30.788923 | 6.7086444 | 3.69E-208 | 4.83E-205 | Lymphatic endothelial cells |
| Ccl21a  | 30.68589  | 9.522429  | 8.78E-207 | 1.08E-203 | Lymphatic endothelial cells |
| Lbp     | 30.360197 | 5.698302  | 1.84E-202 | 2.13E-199 | Lymphatic endothelial cells |
| Gja1    | 30.267927 | 4.0149555 | 3.03E-201 | 3.31E-198 | Lymphatic endothelial cells |
| Elk3    | 30.21613  | 3.2161028 | 1.45E-200 | 1.50E-197 | Lymphatic endothelial cells |
| Tbx1    | 30.021204 | 8.034812  | 5.19E-198 | 5.10E-195 | Lymphatic endothelial cells |
| Ramp2   | 29.272015 | 2.9828246 | 2.36E-188 | 2.20E-185 | Lymphatic endothelial cells |
| Fn1     | 29.247368 | 3.4075615 | 4.85E-188 | 4.33E-185 | Lymphatic endothelial cells |
| Nrp2    | 29.166826 | 3.2818708 | 5.11E-187 | 4.37E-184 | Lymphatic endothelial cells |
| Aplp2   | 29.144375 | 2.6141026 | 9.84E-187 | 8.06E-184 | Lymphatic endothelial cells |
| Cav1    | 29.000765 | 3.434704  | 6.43E-185 | 5.06E-182 | Lymphatic endothelial cells |
| Lmo2    | 28.60823  | 3.0692952 | 5.31E-180 | 4.01E-177 | Lymphatic endothelial cells |
| Fgl2    | 28.532103 | 6.383753  | 4.68E-179 | 3.41E-176 | Lymphatic endothelial cells |
| Rab11a  | 28.49634  | 2.322308  | 1.30E-178 | 9.13E-176 | Lymphatic endothelial cells |
| Arl4a   | 28.371708 | 3.074432  | 4.52E-177 | 3.06E-174 | Lymphatic endothelial cells |
| Prss23  | 28.17334  | 3.3687022 | 1.24E-174 | 8.13E-172 | Lymphatic endothelial cells |
| Lims1   | 28.075243 | 2.6532032 | 1.97E-173 | 1.25E-170 | Lymphatic endothelial cells |
| Sox18   | 28.03484  | 3.0498683 | 6.11E-173 | 3.75E-170 | Lymphatic endothelial cells |
| Reln    | 28.02443  | 6.6844077 | 8.19E-173 | 4.88E-170 | Lymphatic endothelial cells |
| Wnk1    | 27.993216 | 2.5421727 | 1.97E-172 | 1.14E-169 | Lymphatic endothelial cells |
| Tie1    | 27.733736 | 3.1865647 | 2.74E-169 | 1.54E-166 | Lymphatic endothelial cells |
| Ptpn18  | 27.668797 | 3.0457802 | 1.66E-168 | 9.05E-166 | Lymphatic endothelial cells |
| Sgk3    | 27.23474  | 3.8429868 | 2.52E-163 | 1.34E-160 | Lymphatic endothelial cells |
| Cd47    | 27.198198 | 2.4234693 | 6.82E-163 | 3.53E-160 | Lymphatic endothelial cells |
| S100a16 | 26.903913 | 2.620688  | 1.98E-159 | 9.96E-157 | Lymphatic endothelial cells |
| Degs1   | 26.762302 | 2.703449  | 8.88E-158 | 4.36E-155 | Lymphatic endothelial cells |
| Ppfibp1 | 26.734922 | 2.86167   | 1.85E-157 | 8.86E-155 | Lymphatic endothelial cells |
| Timp3   | 26.219368 | 2.8151748 | 1.60E-151 | 7.48E-149 | Lymphatic endothelial cells |
| Myzap   | 25.909925 | 3.8740509 | 5.15E-148 | 2.35E-145 | Lymphatic endothelial cells |
| Cdh5    | 25.894245 | 2.707567  | 7.73E-148 | 3.45E-145 | Lymphatic endothelial cells |
| Myct1   | 25.852747 | 2.9372723 | 2.27E-147 | 9.90E-145 | Lymphatic endothelial cells |
| Pard6g  | 25.664934 | 4.0107536 | 2.88E-145 | 1.23E-142 | Lymphatic endothelial cells |
| Tmsb10  | 25.557108 | 1.3057114 | 4.58E-144 | 1.91E-141 | Lymphatic endothelial cells |
| Slc45a3 | 25.502012 | 8.409014  | 1.87E-143 | 7.67E-141 | Lymphatic endothelial cells |
| Sptssa  | 24.883963 | 1.9145975 | 1.11E-136 | 4.45E-134 | Lymphatic endothelial cells |
| Nudt4   | 24.773153 | 2.7191508 | 1.75E-135 | 6.86E-133 | Lymphatic endothelial cells |
| Igfbp7  | 89.78948  | 7.615959  | 0         | 0         | Capillary endothelial cells |
| Plvap   | 88.494316 | 6.4106455 | 0         | 0         | Capillary endothelial cells |

|         |           |           |   |   |                             |
|---------|-----------|-----------|---|---|-----------------------------|
| Col4a1  | 86.826614 | 5.1916265 | 0 | 0 | Capillary endothelial cells |
| Kdr     | 84.18997  | 5.656364  | 0 | 0 | Capillary endothelial cells |
| Flt1    | 84.16475  | 6.309623  | 0 | 0 | Capillary endothelial cells |
| Col4a2  | 83.84393  | 4.8045063 | 0 | 0 | Capillary endothelial cells |
| Rgcc    | 82.400894 | 6.249624  | 0 | 0 | Capillary endothelial cells |
| Fabp4   | 79.200775 | 5.3882804 | 0 | 0 | Capillary endothelial cells |
| Sparcl1 | 78.923775 | 4.267553  | 0 | 0 | Capillary endothelial cells |
| Plpp3   | 78.118065 | 4.8120294 | 0 | 0 | Capillary endothelial cells |
| Eng     | 78.01707  | 4.6008716 | 0 | 0 | Capillary endothelial cells |
| Emcn    | 77.949104 | 4.8969836 | 0 | 0 | Capillary endothelial cells |
| Hspg2   | 77.80623  | 4.3845534 | 0 | 0 | Capillary endothelial cells |
| Pecam1  | 77.20558  | 4.506887  | 0 | 0 | Capillary endothelial cells |
| Col15a1 | 77.195435 | 5.1079273 | 0 | 0 | Capillary endothelial cells |
| Egfl7   | 76.83877  | 4.411851  | 0 | 0 | Capillary endothelial cells |
| Itm2b   | 75.01674  | 2.5420551 | 0 | 0 | Capillary endothelial cells |
| Ly6a    | 74.057915 | 6.610785  | 0 | 0 | Capillary endothelial cells |
| Ctla2a  | 73.80668  | 5.136814  | 0 | 0 | Capillary endothelial cells |
| Adgrf5  | 73.59198  | 4.8342695 | 0 | 0 | Capillary endothelial cells |
| Slco2a1 | 73.55666  | 6.242526  | 0 | 0 | Capillary endothelial cells |
| Ptprb   | 73.13749  | 5.304671  | 0 | 0 | Capillary endothelial cells |
| Cdh5    | 73.004326 | 4.3133926 | 0 | 0 | Capillary endothelial cells |
| Ifitm3  | 72.90854  | 3.2934346 | 0 | 0 | Capillary endothelial cells |
| Tcim    | 71.96361  | 4.407952  | 0 | 0 | Capillary endothelial cells |
| Mcam    | 71.86014  | 4.507082  | 0 | 0 | Capillary endothelial cells |
| Tm4sf1  | 71.83103  | 4.5313907 | 0 | 0 | Capillary endothelial cells |
| Esam    | 71.30216  | 4.2655807 | 0 | 0 | Capillary endothelial cells |
| Nid1    | 71.224754 | 3.7596745 | 0 | 0 | Capillary endothelial cells |
| Sox18   | 70.8572   | 4.3729167 | 0 | 0 | Capillary endothelial cells |
| Ly6c1   | 70.84272  | 6.9642467 | 0 | 0 | Capillary endothelial cells |
| Cd34    | 70.540146 | 3.8187659 | 0 | 0 | Capillary endothelial cells |
| Tcf4    | 70.470665 | 3.1852684 | 0 | 0 | Capillary endothelial cells |
| Ets1    | 70.30005  | 3.8154159 | 0 | 0 | Capillary endothelial cells |
| Vwa1    | 70.02036  | 5.4885607 | 0 | 0 | Capillary endothelial cells |
| Sparc   | 69.2066   | 2.9715197 | 0 | 0 | Capillary endothelial cells |
| Msn     | 69.079765 | 3.312232  | 0 | 0 | Capillary endothelial cells |
| Cd93    | 69.00599  | 4.2622275 | 0 | 0 | Capillary endothelial cells |
| Pcdh17  | 68.817894 | 4.6590676 | 0 | 0 | Capillary endothelial cells |
| Epas1   | 68.797356 | 4.6742935 | 0 | 0 | Capillary endothelial cells |
| Mgll    | 68.4712   | 4.6326466 | 0 | 0 | Capillary endothelial cells |
| Thbs1   | 68.238716 | 5.146039  | 0 | 0 | Capillary endothelial cells |
| Myct1   | 67.927376 | 4.4942694 | 0 | 0 | Capillary endothelial cells |
| Cd300lg | 67.784645 | 8.077618  | 0 | 0 | Capillary endothelial cells |
| Ramp2   | 67.59119  | 3.3666542 | 0 | 0 | Capillary endothelial cells |
| Robo4   | 66.526344 | 4.933957  | 0 | 0 | Capillary endothelial cells |
| Plpp1   | 66.4924   | 3.9864419 | 0 | 0 | Capillary endothelial cells |
| Rflnb   | 66.48284  | 4.0470586 | 0 | 0 | Capillary endothelial cells |
| Gimap6  | 66.2773   | 4.0190077 | 0 | 0 | Capillary endothelial cells |

|          |           |            |           |           |                              |
|----------|-----------|------------|-----------|-----------|------------------------------|
| Cd81     | 66.1666   | 2.1054316  | 0         | 0         | Capillary endothelial cells  |
| Bex1     | 55.212868 | 4.493469   | 0         | 0         | Lgr5+ stem/ progenitor cells |
| Epcam    | 52.03011  | 4.4348702  | 0         | 0         | Lgr5+ stem/ progenitor cells |
| Bex4     | 51.338818 | 3.6084425  | 0         | 0         | Lgr5+ stem/ progenitor cells |
| Mif      | 50.97397  | 2.0410118  | 0         | 0         | Lgr5+ stem/ progenitor cells |
| Spint2   | 46.232044 | 3.0994074  | 0         | 0         | Lgr5+ stem/ progenitor cells |
| Krt19    | 45.972622 | 3.562554   | 0         | 0         | Lgr5+ stem/ progenitor cells |
| Cldn7    | 45.97086  | 3.6116402  | 0         | 0         | Lgr5+ stem/ progenitor cells |
| Krt8     | 45.7374   | 3.3636153  | 0         | 0         | Lgr5+ stem/ progenitor cells |
| Stard10  | 45.402912 | 3.3991072  | 0         | 0         | Lgr5+ stem/ progenitor cells |
| Rpl14    | 45.20539  | 1.0248518  | 0         | 0         | Lgr5+ stem/ progenitor cells |
| Tspan8   | 45.134136 | 3.7707462  | 0         | 0         | Lgr5+ stem/ progenitor cells |
| Rpl32    | 44.15847  | 0.8756179  | 0         | 0         | Lgr5+ stem/ progenitor cells |
| Wfdc2    | 43.670288 | 4.0757623  | 0         | 0         | Lgr5+ stem/ progenitor cells |
| Krt18    | 43.629726 | 3.2087321  | 0         | 0         | Lgr5+ stem/ progenitor cells |
| Cldn3    | 42.84976  | 4.1248055  | 0         | 0         | Lgr5+ stem/ progenitor cells |
| Rpl12    | 42.305195 | 1.0096365  | 0         | 0         | Lgr5+ stem/ progenitor cells |
| Eef1b2   | 41.797752 | 1.1307305  | 0         | 0         | Lgr5+ stem/ progenitor cells |
| Pcbd1    | 41.37513  | 2.9050703  | 0         | 0         | Lgr5+ stem/ progenitor cells |
| Rps3     | 41.357502 | 0.88101584 | 0         | 0         | Lgr5+ stem/ progenitor cells |
| Fkbp4    | 40.866737 | 2.0343304  | 0         | 0         | Lgr5+ stem/ progenitor cells |
| Rpl27a   | 40.853367 | 0.7510251  | 0         | 0         | Lgr5+ stem/ progenitor cells |
| Rps23    | 40.829536 | 0.8988371  | 0         | 0         | Lgr5+ stem/ progenitor cells |
| Lgals2   | 39.92297  | 3.4978187  | 0         | 0         | Lgr5+ stem/ progenitor cells |
| Rpl10a   | 39.55256  | 0.8755326  | 0         | 0         | Lgr5+ stem/ progenitor cells |
| Rps13    | 39.503296 | 0.7800775  | 0         | 0         | Lgr5+ stem/ progenitor cells |
| Cystm1   | 39.47718  | 2.7224216  | 0         | 0         | Lgr5+ stem/ progenitor cells |
| Rps5     | 39.41215  | 0.92026067 | 0         | 0         | Lgr5+ stem/ progenitor cells |
| Hspe1    | 39.403725 | 1.5181063  | 0         | 0         | Lgr5+ stem/ progenitor cells |
| Cdx2     | 39.148636 | 3.4054902  | 0         | 0         | Lgr5+ stem/ progenitor cells |
| Cldn6    | 39.111134 | 6.964539   | 0         | 0         | Lgr5+ stem/ progenitor cells |
| Rps10    | 38.978947 | 0.704051   | 0         | 0         | Lgr5+ stem/ progenitor cells |
| Tpi1     | 38.9767   | 1.7053907  | 0         | 0         | Lgr5+ stem/ progenitor cells |
| Ttr      | 38.630722 | 3.136799   | 0         | 0         | Lgr5+ stem/ progenitor cells |
| Rpl28    | 38.599464 | 0.6745202  | 0         | 0         | Lgr5+ stem/ progenitor cells |
| Rpl3     | 38.324097 | 0.9446244  | 0         | 0         | Lgr5+ stem/ progenitor cells |
| Rps20    | 38.180603 | 0.6704649  | 0         | 0         | Lgr5+ stem/ progenitor cells |
| Rpsa     | 38.13921  | 0.92531383 | 0         | 0         | Lgr5+ stem/ progenitor cells |
| Ldha     | 38.105495 | 1.6245693  | 0         | 0         | Lgr5+ stem/ progenitor cells |
| Akr1c19  | 37.71008  | 2.571044   | 0         | 0         | Lgr5+ stem/ progenitor cells |
| Rbp4     | 37.566673 | 4.984028   | 0.00E+00  | 3.70E-306 | Lgr5+ stem/ progenitor cells |
| Crb3     | 37.424297 | 3.2746747  | 1.57E-306 | 7.54E-304 | Lgr5+ stem/ progenitor cells |
| Rpl19    | 37.3731   | 0.7121402  | 1.07E-305 | 5.00E-303 | Lgr5+ stem/ progenitor cells |
| Hsp90aa1 | 37.338875 | 1.444746   | 3.84E-305 | 1.76E-302 | Lgr5+ stem/ progenitor cells |
| Rps19    | 37.318245 | 0.75811595 | 8.30E-305 | 3.71E-302 | Lgr5+ stem/ progenitor cells |
| Rpl26    | 37.178204 | 0.6898636  | 1.54E-302 | 6.71E-300 | Lgr5+ stem/ progenitor cells |
| Rpl13    | 37.110344 | 0.6428809  | 1.91E-301 | 8.17E-299 | Lgr5+ stem/ progenitor cells |

|         |           |            |           |           |                              |
|---------|-----------|------------|-----------|-----------|------------------------------|
| Rpl8    | 36.98361  | 0.8192285  | 2.10E-299 | 8.78E-297 | Lgr5+ stem/ progenitor cells |
| Rack1   | 36.904358 | 0.84744966 | 3.93E-298 | 1.61E-295 | Lgr5+ stem/ progenitor cells |
| Npm1    | 36.74171  | 1.0982567  | 1.58E-295 | 6.20E-293 | Lgr5+ stem/ progenitor cells |
| Rps3a1  | 36.534424 | 0.6900639  | 3.15E-292 | 1.21E-289 | Lgr5+ stem/ progenitor cells |
| Epcam   | 69.46512  | 5.6213465  | 0         | 0         | Enterocytes-1                |
| Cldn7   | 68.3597   | 5.2297873  | 0         | 0         | Enterocytes-1                |
| Pycard  | 67.70125  | 4.5776653  | 0         | 0         | Enterocytes-1                |
| Lypd8   | 66.69021  | 5.9060364  | 0         | 0         | Enterocytes-1                |
| Krt8    | 66.58098  | 4.8837533  | 0         | 0         | Enterocytes-1                |
| Lgals4  | 65.615036 | 5.997247   | 0         | 0         | Enterocytes-1                |
| Oat     | 65.538246 | 4.195455   | 0         | 0         | Enterocytes-1                |
| Mt1     | 65.23722  | 5.044687   | 0         | 0         | Enterocytes-1                |
| Krt19   | 64.73143  | 4.8128166  | 0         | 0         | Enterocytes-1                |
| Atp1b1  | 64.71045  | 4.3440685  | 0         | 0         | Enterocytes-1                |
| Aldh1b1 | 64.15497  | 4.5572443  | 0         | 0         | Enterocytes-1                |
| Ndr1    | 64.01326  | 4.346907   | 0         | 0         | Enterocytes-1                |
| Tspan8  | 62.998215 | 4.517108   | 0         | 0         | Enterocytes-1                |
| Lgals2  | 62.67992  | 4.9912395  | 0         | 0         | Enterocytes-1                |
| Spint2  | 62.40842  | 3.754218   | 0         | 0         | Enterocytes-1                |
| Mgst1   | 61.98809  | 3.820584   | 0         | 0         | Enterocytes-1                |
| Hspd1   | 61.780025 | 2.7867846  | 0         | 0         | Enterocytes-1                |
| Ociad2  | 61.51047  | 4.1710668  | 0         | 0         | Enterocytes-1                |
| Cdh17   | 61.468063 | 4.552955   | 0         | 0         | Enterocytes-1                |
| Cps1    | 60.417057 | 5.1351633  | 0         | 0         | Enterocytes-1                |
| S100g   | 60.077213 | 4.3066545  | 0         | 0         | Enterocytes-1                |
| Cystm1  | 59.95376  | 3.902756   | 0         | 0         | Enterocytes-1                |
| Tm4sf20 | 59.7715   | 4.3316574  | 0         | 0         | Enterocytes-1                |
| Fbp2    | 59.473614 | 4.067253   | 0         | 0         | Enterocytes-1                |
| Mgst3   | 59.212452 | 3.3627238  | 0         | 0         | Enterocytes-1                |
| Akr1c19 | 58.80441  | 4.124409   | 0         | 0         | Enterocytes-1                |
| Tm4sf5  | 58.74384  | 4.1211853  | 0         | 0         | Enterocytes-1                |
| Anxa4   | 58.734932 | 3.733457   | 0         | 0         | Enterocytes-1                |
| Chchd10 | 58.501213 | 3.6208506  | 0         | 0         | Enterocytes-1                |
| Chpt1   | 58.301926 | 3.6771474  | 0         | 0         | Enterocytes-1                |
| Fabp2   | 58.084366 | 4.0516405  | 0         | 0         | Enterocytes-1                |
| Hspe1   | 57.613728 | 2.0128727  | 0         | 0         | Enterocytes-1                |
| Plac8   | 57.44593  | 3.6576338  | 0         | 0         | Enterocytes-1                |
| Aldob   | 57.389545 | 4.0296454  | 0         | 0         | Enterocytes-1                |
| Spink1  | 56.726414 | 3.7064116  | 0         | 0         | Enterocytes-1                |
| Klf5    | 56.71239  | 3.9855962  | 0         | 0         | Enterocytes-1                |
| Ckmt1   | 56.61256  | 3.8344567  | 0         | 0         | Enterocytes-1                |
| Vil1    | 56.53001  | 3.975547   | 0         | 0         | Enterocytes-1                |
| Prap1   | 56.505943 | 4.4648714  | 0         | 0         | Enterocytes-1                |
| Eps8l3  | 56.294838 | 3.9942153  | 0         | 0         | Enterocytes-1                |
| Ugt2b34 | 56.202347 | 4.381238   | 0         | 0         | Enterocytes-1                |
| Gna11   | 56.009106 | 2.8744059  | 0         | 0         | Enterocytes-1                |
| Otc     | 55.96696  | 4.4270372  | 0         | 0         | Enterocytes-1                |

|         |           |           |   |   |               |
|---------|-----------|-----------|---|---|---------------|
| Gipc2   | 55.839676 | 3.7838352 | 0 | 0 | Enterocytes-1 |
| Akr1c13 | 55.822517 | 3.8173056 | 0 | 0 | Enterocytes-1 |
| Hadh    | 55.593224 | 2.8282561 | 0 | 0 | Enterocytes-1 |
| Amn     | 55.438744 | 4.1145315 | 0 | 0 | Enterocytes-1 |
| Calml4  | 55.329063 | 3.3484585 | 0 | 0 | Enterocytes-1 |
| Dbi     | 55.229755 | 2.3655093 | 0 | 0 | Enterocytes-1 |
| Gsto1   | 54.945267 | 2.929926  | 0 | 0 | Enterocytes-1 |
| Apoa4   | 69.51632  | 8.33324   | 0 | 0 | Enterocytes-2 |
| Apoa1   | 69.469604 | 8.330999  | 0 | 0 | Enterocytes-2 |
| Mttp    | 69.09272  | 6.509332  | 0 | 0 | Enterocytes-2 |
| Mamdc4  | 68.824455 | 6.678704  | 0 | 0 | Enterocytes-2 |
| Acsl5   | 68.27702  | 5.592249  | 0 | 0 | Enterocytes-2 |
| Apoc3   | 68.14572  | 7.3966002 | 0 | 0 | Enterocytes-2 |
| Apob    | 68.09869  | 6.406065  | 0 | 0 | Enterocytes-2 |
| Prap1   | 68.05809  | 6.600485  | 0 | 0 | Enterocytes-2 |
| Fabp2   | 67.87579  | 8.0084    | 0 | 0 | Enterocytes-2 |
| Chpt1   | 67.684944 | 5.326595  | 0 | 0 | Enterocytes-2 |
| Ace2    | 67.34102  | 6.558198  | 0 | 0 | Enterocytes-2 |
| Spink1  | 67.136444 | 6.035091  | 0 | 0 | Enterocytes-2 |
| Ckmt1   | 66.89047  | 5.812171  | 0 | 0 | Enterocytes-2 |
| Glb1    | 66.78754  | 5.0050826 | 0 | 0 | Enterocytes-2 |
| Aldob   | 66.74444  | 5.847734  | 0 | 0 | Enterocytes-2 |
| Muc13   | 66.69614  | 5.605587  | 0 | 0 | Enterocytes-2 |
| Dgat2   | 66.540184 | 6.232572  | 0 | 0 | Enterocytes-2 |
| Naga    | 66.48544  | 5.185841  | 0 | 0 | Enterocytes-2 |
| Amn     | 66.3892   | 5.7010984 | 0 | 0 | Enterocytes-2 |
| Smim24  | 66.38537  | 5.2385583 | 0 | 0 | Enterocytes-2 |
| Scd2    | 66.19795  | 3.9184225 | 0 | 0 | Enterocytes-2 |
| Dbi     | 66.161125 | 3.5436497 | 0 | 0 | Enterocytes-2 |
| Rbp2    | 66.11607  | 7.3933277 | 0 | 0 | Enterocytes-2 |
| Alpi    | 65.97057  | 6.444012  | 0 | 0 | Enterocytes-2 |
| Akr1c13 | 65.95002  | 5.3099375 | 0 | 0 | Enterocytes-2 |
| Fabp1   | 65.861206 | 8.5372305 | 0 | 0 | Enterocytes-2 |
| Fbp2    | 65.81629  | 5.299619  | 0 | 0 | Enterocytes-2 |
| Hmgcs2  | 65.81629  | 5.594484  | 0 | 0 | Enterocytes-2 |
| Akr1c19 | 65.78804  | 5.483113  | 0 | 0 | Enterocytes-2 |
| Cdhr5   | 65.776596 | 6.0516386 | 0 | 0 | Enterocytes-2 |
| Reep6   | 65.76117  | 5.3981586 | 0 | 0 | Enterocytes-2 |
| Lgals4  | 65.710976 | 6.3273883 | 0 | 0 | Enterocytes-2 |
| Cdh17   | 65.70879  | 5.1672797 | 0 | 0 | Enterocytes-2 |
| Maob    | 65.673294 | 6.0777955 | 0 | 0 | Enterocytes-2 |
| Creb3l3 | 65.66364  | 6.877013  | 0 | 0 | Enterocytes-2 |
| Myo15b  | 65.64842  | 5.362803  | 0 | 0 | Enterocytes-2 |
| Bpnt1   | 65.53623  | 4.923611  | 0 | 0 | Enterocytes-2 |
| Sult1b1 | 65.489006 | 5.793227  | 0 | 0 | Enterocytes-2 |
| Neu1    | 65.233345 | 4.8126397 | 0 | 0 | Enterocytes-2 |
| Eps8l3  | 65.057014 | 5.239022  | 0 | 0 | Enterocytes-2 |

|          |           |           |           |           |               |
|----------|-----------|-----------|-----------|-----------|---------------|
| Calml4   | 64.688805 | 4.382403  | 0         | 0         | Enterocytes-2 |
| Mogat2   | 64.6357   | 5.526076  | 0         | 0         | Enterocytes-2 |
| Renbp    | 64.51815  | 4.857888  | 0         | 0         | Enterocytes-2 |
| Ctsa     | 64.4281   | 3.9748895 | 0         | 0         | Enterocytes-2 |
| Sult1d1  | 64.40586  | 5.3288336 | 0         | 0         | Enterocytes-2 |
| Tm4sf5   | 64.25322  | 4.8657846 | 0         | 0         | Enterocytes-2 |
| Tm4sf20  | 64.195595 | 4.9949813 | 0         | 0         | Enterocytes-2 |
| Cystm1   | 64.1361   | 4.634478  | 0         | 0         | Enterocytes-2 |
| Pdzk1ip1 | 64.131035 | 5.3359413 | 0         | 0         | Enterocytes-2 |
| Clec2h   | 64.12034  | 5.9149485 | 0         | 0         | Enterocytes-2 |
| Fabp2    | 44.78577  | 8.853637  | 0         | 0         | Enterocytes-3 |
| Rbp2     | 42.87948  | 7.8003387 | 0         | 0         | Enterocytes-3 |
| Ftl1     | 41.585514 | 2.4964297 | 0         | 0         | Enterocytes-3 |
| Lgals4   | 41.37771  | 6.0211177 | 0         | 0         | Enterocytes-3 |
| Npl      | 40.58744  | 6.8058333 | 0         | 0         | Enterocytes-3 |
| Oat      | 39.82526  | 4.6176033 | 0         | 0         | Enterocytes-3 |
| Aldob    | 39.561672 | 5.7658024 | 0         | 0         | Enterocytes-3 |
| Apoc3    | 39.223156 | 6.4400516 | 0         | 0         | Enterocytes-3 |
| Fth1     | 39.165154 | 2.277027  | 0         | 0         | Enterocytes-3 |
| Fabp1    | 38.691578 | 7.5830593 | 0         | 0         | Enterocytes-3 |
| Dbi      | 38.531815 | 3.2856104 | 0         | 0         | Enterocytes-3 |
| Ckmt1    | 37.977478 | 5.5462837 | 0         | 0         | Enterocytes-3 |
| Spink1   | 37.900898 | 5.652116  | 0         | 0         | Enterocytes-3 |
| Ass1     | 37.680786 | 5.7713547 | 0         | 0         | Enterocytes-3 |
| Apoa1    | 37.221603 | 5.8886476 | 3.05E-303 | 3.33E-300 | Enterocytes-3 |
| Cystm1   | 35.33457  | 4.7121625 | 1.73E-273 | 1.70E-270 | Enterocytes-3 |
| Gpx3     | 34.56928  | 5.5815716 | 7.32E-262 | 5.99E-259 | Enterocytes-3 |
| Apoa4    | 33.364265 | 5.1421547 | 4.52E-244 | 2.96E-241 | Enterocytes-3 |
| S100a1   | 33.14358  | 5.0822673 | 7.01E-241 | 4.17E-238 | Enterocytes-3 |
| Scp2     | 33.08306  | 3.2146556 | 5.21E-240 | 2.92E-237 | Enterocytes-3 |
| Renbp    | 32.86903  | 4.9469466 | 6.09E-237 | 3.24E-234 | Enterocytes-3 |
| Akr1c19  | 32.62035  | 4.727818  | 2.11E-233 | 1.06E-230 | Enterocytes-3 |
| Acaa2    | 32.469833 | 3.6922102 | 2.84E-231 | 1.40E-228 | Enterocytes-3 |
| Hadh     | 32.40953  | 3.5071406 | 2.01E-230 | 9.43E-228 | Enterocytes-3 |
| Mdh1     | 32.177635 | 2.7692502 | 3.63E-227 | 1.62E-224 | Enterocytes-3 |
| Slc9a3r1 | 32.09364  | 3.992081  | 5.41E-226 | 2.36E-223 | Enterocytes-3 |
| Fbp2     | 31.177828 | 4.5339007 | 2.13E-213 | 7.75E-211 | Enterocytes-3 |
| Slc25a3  | 30.876242 | 1.7490197 | 2.49E-209 | 8.59E-207 | Enterocytes-3 |
| Serpib6a | 30.775576 | 3.2982292 | 5.56E-208 | 1.88E-205 | Enterocytes-3 |
| Clec2h   | 30.602535 | 5.54745   | 1.13E-205 | 3.77E-203 | Enterocytes-3 |
| Cox7c    | 30.588535 | 1.7053123 | 1.74E-205 | 5.70E-203 | Enterocytes-3 |
| Uqcrq    | 30.259296 | 2.3485224 | 3.94E-201 | 1.25E-198 | Enterocytes-3 |
| Rab11a   | 30.25155  | 3.0066457 | 4.98E-201 | 1.55E-198 | Enterocytes-3 |
| Chchd2   | 30.243286 | 1.3236135 | 6.39E-201 | 1.96E-198 | Enterocytes-3 |
| Sult1b1  | 30.188652 | 4.990303  | 3.34E-200 | 1.01E-197 | Enterocytes-3 |
| Hmgcs2   | 29.882477 | 4.4140153 | 3.32E-196 | 9.20E-194 | Enterocytes-3 |
| Bex4     | 29.533588 | 3.8996942 | 1.07E-191 | 2.80E-189 | Enterocytes-3 |



|           |           |           |           |           |               |
|-----------|-----------|-----------|-----------|-----------|---------------|
| Chpt1     | 29.468513 | 3.9233603 | 7.29E-191 | 1.89E-188 | Enterocytes-3 |
| Slc25a5   | 29.399866 | 2.0475473 | 5.51E-190 | 1.41E-187 | Enterocytes-3 |
| Selenop   | 29.284079 | 3.235975  | 1.65E-188 | 4.12E-186 | Enterocytes-3 |
| Akr1c13   | 29.204453 | 4.443906  | 1.70E-187 | 4.13E-185 | Enterocytes-3 |
| Anxa4     | 29.073183 | 4.1338677 | 7.84E-186 | 1.88E-183 | Enterocytes-3 |
| Guca2b    | 28.48784  | 5.4173393 | 1.66E-178 | 3.66E-176 | Enterocytes-3 |
| Cox5a     | 28.271202 | 1.7266595 | 7.81E-176 | 1.71E-173 | Enterocytes-3 |
| Prap1     | 28.057447 | 4.2904954 | 3.24E-173 | 6.70E-171 | Enterocytes-3 |
| Eps8l3    | 27.692621 | 4.30864   | 8.57E-169 | 1.65E-166 | Enterocytes-3 |
| Calml4    | 27.58537  | 3.723878  | 1.67E-167 | 3.12E-165 | Enterocytes-3 |
| Plin3     | 27.578121 | 3.4743812 | 2.04E-167 | 3.78E-165 | Enterocytes-3 |
| Txndc17   | 27.295898 | 2.2049901 | 4.74E-164 | 8.55E-162 | Enterocytes-3 |
| Cstb      | 27.223059 | 3.143755  | 3.46E-163 | 6.13E-161 | Enterocytes-3 |
| Agr2      | 26.170574 | 12.01832  | 5.75E-151 | 1.13E-146 | Goblet cells  |
| Tff3      | 26.13607  | 11.303531 | 1.42E-150 | 1.39E-146 | Goblet cells  |
| Fcgbp     | 25.362043 | 11.448082 | 6.62E-142 | 4.34E-138 | Goblet cells  |
| Krt18     | 25.297665 | 5.189072  | 3.39E-141 | 1.67E-137 | Goblet cells  |
| Spint2    | 25.118046 | 4.7269545 | 3.16E-139 | 1.15E-135 | Goblet cells  |
| Fxyd3     | 25.11368  | 6.8455043 | 3.53E-139 | 1.15E-135 | Goblet cells  |
| Tpd52     | 25.032125 | 4.9243765 | 2.73E-138 | 7.67E-135 | Goblet cells  |
| Stard10   | 25.012339 | 5.0668173 | 4.49E-138 | 1.10E-134 | Goblet cells  |
| Krt8      | 24.662064 | 5.1448417 | 2.73E-134 | 5.97E-131 | Goblet cells  |
| Sct       | 24.485462 | 8.440702  | 2.11E-132 | 4.15E-129 | Goblet cells  |
| Tspan8    | 24.349716 | 4.9222507 | 5.84E-131 | 9.72E-128 | Goblet cells  |
| Serpina1b | 24.349043 | 7.5299854 | 5.93E-131 | 9.72E-128 | Goblet cells  |
| Guca2a    | 24.227701 | 7.827113  | 1.14E-129 | 1.72E-126 | Goblet cells  |
| Cldn3     | 23.931479 | 5.3756065 | 1.44E-126 | 2.02E-123 | Goblet cells  |
| Hepacam2  | 23.694794 | 8.698347  | 4.08E-124 | 5.35E-121 | Goblet cells  |
| Gm5s      | 23.582987 | 4.513719  | 5.76E-123 | 7.08E-120 | Goblet cells  |
| Lgals4    | 23.449144 | 5.77365   | 1.35E-121 | 1.56E-118 | Goblet cells  |
| Tpsg1     | 23.364502 | 11.724909 | 9.82E-121 | 1.07E-117 | Goblet cells  |
| Galnt7    | 23.260845 | 4.66685   | 1.10E-119 | 1.14E-116 | Goblet cells  |
| Spink4    | 23.07405  | 11.165083 | 8.44E-118 | 8.29E-115 | Goblet cells  |
| Phgr1     | 23.059866 | 5.5644603 | 1.17E-117 | 1.10E-114 | Goblet cells  |
| Gm1123    | 22.961842 | 9.103927  | 1.12E-116 | 1.00E-113 | Goblet cells  |
| Gcnt3     | 22.882614 | 9.788913  | 6.92E-116 | 5.91E-113 | Goblet cells  |
| Txndc5    | 22.849693 | 3.79769   | 1.47E-115 | 1.21E-112 | Goblet cells  |
| Clca1     | 22.689018 | 12.697485 | 5.75E-114 | 4.52E-111 | Goblet cells  |
| Smim6     | 22.573038 | 6.254271  | 7.98E-113 | 6.03E-110 | Goblet cells  |
| Car8      | 22.245104 | 4.3573365 | 1.26E-109 | 9.16E-107 | Goblet cells  |
| Muc2      | 22.231771 | 11.614806 | 1.69E-109 | 1.19E-106 | Goblet cells  |
| Qsox1     | 22.13536  | 4.83937   | 1.44E-108 | 9.78E-106 | Goblet cells  |
| Krt19     | 22.103333 | 4.303239  | 2.94E-108 | 1.92E-105 | Goblet cells  |
| Epcam     | 22.079948 | 4.7040653 | 4.93E-108 | 3.12E-105 | Goblet cells  |
| Lypd8     | 22.076317 | 5.13634   | 5.34E-108 | 3.28E-105 | Goblet cells  |
| Cldn7     | 21.96367  | 4.325219  | 6.41E-107 | 3.82E-104 | Goblet cells  |
| Tspan1    | 21.955776 | 6.746655  | 7.63E-107 | 4.41E-104 | Goblet cells  |

|           |           |           |           |           |                       |
|-----------|-----------|-----------|-----------|-----------|-----------------------|
| Galnt12   | 21.903168 | 5.8995943 | 2.42E-106 | 1.36E-103 | Goblet cells          |
| Tspan13   | 21.69169  | 3.3592787 | 2.46E-104 | 1.34E-101 | Goblet cells          |
| Fut2      | 21.609804 | 8.784787  | 1.45E-103 | 7.72E-101 | Goblet cells          |
| Selenom   | 21.601505 | 3.4389093 | 1.74E-103 | 8.99E-101 | Goblet cells          |
| Smim14    | 21.524435 | 3.379475  | 9.19E-103 | 4.63E-100 | Goblet cells          |
| Ramp1     | 21.438421 | 4.890588  | 5.86E-102 | 2.88E-99  | Goblet cells          |
| Scin      | 21.432629 | 6.4196644 | 6.63E-102 | 3.18E-99  | Goblet cells          |
| Foxa3     | 21.284227 | 6.715504  | 1.59E-100 | 7.44E-98  | Goblet cells          |
| Krt7      | 21.156345 | 3.945099  | 2.41E-99  | 1.10E-96  | Goblet cells          |
| Gfpt1     | 21.145916 | 3.8581061 | 3.01E-99  | 1.34E-96  | Goblet cells          |
| S100a6    | 21.142157 | 3.906018  | 3.26E-99  | 1.42E-96  | Goblet cells          |
| Lsr       | 21.058619 | 4.05281   | 1.91E-98  | 8.15E-96  | Goblet cells          |
| Ehf       | 20.884733 | 6.589454  | 7.37E-97  | 3.02E-94  | Goblet cells          |
| Ccl9      | 20.884718 | 6.8904014 | 7.37E-97  | 3.02E-94  | Goblet cells          |
| Ms4a8a    | 20.875826 | 5.6180573 | 8.88E-97  | 3.56E-94  | Goblet cells          |
| Spdef     | 20.868128 | 9.959942  | 1.04E-96  | 4.10E-94  | Goblet cells          |
| Fxyd3     | 21.3488   | 6.9097476 | 4.00E-101 | 7.86E-97  | Enteroendocrine cells |
| Tm4sf4    | 21.17511  | 8.253503  | 1.62E-99  | 1.59E-95  | Enteroendocrine cells |
| Krt8      | 21.089972 | 4.9037886 | 9.83E-99  | 6.44E-95  | Enteroendocrine cells |
| Aplp1     | 20.439259 | 5.9563384 | 7.49E-93  | 3.67E-89  | Enteroendocrine cells |
| Spint2    | 20.428493 | 4.127133  | 9.33E-93  | 3.67E-89  | Enteroendocrine cells |
| Cck       | 20.390823 | 10.108879 | 2.02E-92  | 6.61E-89  | Enteroendocrine cells |
| Chgb      | 20.337658 | 10.224763 | 5.97E-92  | 1.68E-88  | Enteroendocrine cells |
| Insm1     | 20.205956 | 6.897596  | 8.68E-91  | 2.13E-87  | Enteroendocrine cells |
| Cpe       | 19.841843 | 4.282301  | 1.30E-87  | 2.83E-84  | Enteroendocrine cells |
| Sct       | 19.809828 | 10.678531 | 2.45E-87  | 4.81E-84  | Enteroendocrine cells |
| Tff3      | 19.61663  | 7.9072237 | 1.12E-85  | 1.99E-82  | Enteroendocrine cells |
| Neurod1   | 19.26183  | 13.68912  | 1.12E-82  | 1.84E-79  | Enteroendocrine cells |
| Hepacam2  | 19.125175 | 8.248772  | 1.56E-81  | 2.36E-78  | Enteroendocrine cells |
| Cacna1a   | 19.114258 | 5.0770793 | 1.92E-81  | 2.70E-78  | Enteroendocrine cells |
| Ttr       | 18.966846 | 5.254751  | 3.21E-80  | 4.20E-77  | Enteroendocrine cells |
| Stard10   | 18.767925 | 3.9595811 | 1.38E-78  | 1.70E-75  | Enteroendocrine cells |
| Bex2      | 18.712849 | 3.7542238 | 3.89E-78  | 4.50E-75  | Enteroendocrine cells |
| Cystm1    | 18.683567 | 3.9009464 | 6.74E-78  | 7.35E-75  | Enteroendocrine cells |
| Krt18     | 18.665873 | 3.8642366 | 9.38E-78  | 9.71E-75  | Enteroendocrine cells |
| Vwa5b2    | 18.269276 | 8.2923565 | 1.45E-74  | 1.43E-71  | Enteroendocrine cells |
| Fam183b   | 18.214827 | 6.9462113 | 3.94E-74  | 3.68E-71  | Enteroendocrine cells |
| Krt7      | 18.122068 | 4.188857  | 2.13E-73  | 1.91E-70  | Enteroendocrine cells |
| Chga      | 17.902206 | 7.6646953 | 1.13E-71  | 9.68E-69  | Enteroendocrine cells |
| Epcam     | 17.503271 | 4.0063276 | 1.35E-68  | 1.06E-65  | Enteroendocrine cells |
| Pcsk1     | 17.424538 | 9.266074  | 5.37E-68  | 4.06E-65  | Enteroendocrine cells |
| Tpd52     | 17.313593 | 3.1495795 | 3.71E-67  | 2.70E-64  | Enteroendocrine cells |
| Ddc       | 17.249117 | 5.4503455 | 1.14E-66  | 7.97E-64  | Enteroendocrine cells |
| Pax6      | 17.201801 | 11.911305 | 2.57E-66  | 1.74E-63  | Enteroendocrine cells |
| Clps      | 17.10995  | 9.05349   | 1.25E-65  | 8.20E-63  | Enteroendocrine cells |
| Serpina1c | 16.971493 | 7.38226   | 1.33E-64  | 8.46E-62  | Enteroendocrine cells |
| Bsg       | 16.88407  | 2.1067972 | 5.89E-64  | 3.62E-61  | Enteroendocrine cells |

|          |           |           |          |          |                       |
|----------|-----------|-----------|----------|----------|-----------------------|
| Selenom  | 16.852163 | 2.9006822 | 1.01E-63 | 6.02E-61 | Enteroendocrine cells |
| Lgals2   | 16.763992 | 4.3269334 | 4.48E-63 | 2.59E-60 | Enteroendocrine cells |
| Gfra3    | 16.630909 | 7.2968197 | 4.16E-62 | 2.34E-59 | Enteroendocrine cells |
| Scgn     | 16.554739 | 11.09793  | 1.48E-61 | 8.08E-59 | Enteroendocrine cells |
| Isl1     | 16.51819  | 5.618051  | 2.71E-61 | 1.44E-58 | Enteroendocrine cells |
| Anxa4    | 16.361963 | 3.2743394 | 3.57E-60 | 1.85E-57 | Enteroendocrine cells |
| Cldn7    | 16.331867 | 3.467253  | 5.86E-60 | 2.95E-57 | Enteroendocrine cells |
| Scg3     | 16.228907 | 5.8903184 | 3.15E-59 | 1.55E-56 | Enteroendocrine cells |
| Cdkn1a   | 16.14333  | 4.860263  | 1.27E-58 | 6.06E-56 | Enteroendocrine cells |
| Rimbp2   | 16.023457 | 9.625607  | 8.76E-58 | 4.01E-55 | Enteroendocrine cells |
| Prnp     | 15.933997 | 3.0386984 | 3.68E-57 | 1.64E-54 | Enteroendocrine cells |
| Hmgn3    | 15.615635 | 3.2476897 | 5.70E-55 | 2.43E-52 | Enteroendocrine cells |
| Serpib1a | 15.526969 | 3.601449  | 2.28E-54 | 9.53E-52 | Enteroendocrine cells |
| Rbp4     | 15.514488 | 5.8718786 | 2.77E-54 | 1.13E-51 | Enteroendocrine cells |
| Rph3al   | 15.400054 | 5.4144654 | 1.64E-53 | 6.56E-51 | Enteroendocrine cells |
| Cldn4    | 15.372856 | 4.6927905 | 2.49E-53 | 9.78E-51 | Enteroendocrine cells |
| Lsr      | 15.340988 | 3.529568  | 4.07E-53 | 1.57E-50 | Enteroendocrine cells |
| Gch1     | 14.983499 | 4.455547  | 9.41E-51 | 3.43E-48 | Enteroendocrine cells |
| Smim22   | 14.960397 | 3.5693083 | 1.33E-50 | 4.76E-48 | Enteroendocrine cells |
| Tubb3    | 59.8455   | 8.330788  | 0        | 0        | Enteric neurons       |
| Dpysl3   | 59.33426  | 5.7338777 | 0        | 0        | Enteric neurons       |
| Tuba1a   | 59.12858  | 4.0613966 | 0        | 0        | Enteric neurons       |
| Phox2b   | 58.307087 | 6.664038  | 0        | 0        | Enteric neurons       |
| Elavl4   | 57.35558  | 8.39197   | 0        | 0        | Enteric neurons       |
| Uchl1    | 57.208286 | 5.724713  | 0        | 0        | Enteric neurons       |
| Map1b    | 56.00317  | 4.8099036 | 0        | 0        | Enteric neurons       |
| Cadm1    | 55.708374 | 6.2641296 | 0        | 0        | Enteric neurons       |
| Tlx2     | 53.917294 | 6.55518   | 0        | 0        | Enteric neurons       |
| Stmn1    | 52.786316 | 2.8626635 | 0        | 0        | Enteric neurons       |
| Tubb2b   | 52.567627 | 4.4543867 | 0        | 0        | Enteric neurons       |
| Bex2     | 52.024452 | 4.1393185 | 0        | 0        | Enteric neurons       |
| Prdx2    | 51.743057 | 1.9445248 | 0        | 0        | Enteric neurons       |
| Tagln3   | 51.46556  | 7.1810217 | 0        | 0        | Enteric neurons       |
| Stmn3    | 51.31881  | 8.023682  | 0        | 0        | Enteric neurons       |
| Sox11    | 50.85533  | 3.7254374 | 0        | 0        | Enteric neurons       |
| Elavl3   | 50.53903  | 8.302963  | 0        | 0        | Enteric neurons       |
| Celf3    | 50.359505 | 6.849462  | 0        | 0        | Enteric neurons       |
| Phox2a   | 49.192116 | 8.708404  | 0        | 0        | Enteric neurons       |
| Hand2    | 48.807415 | 3.7163837 | 0        | 0        | Enteric neurons       |
| Gap43    | 48.792713 | 5.6510835 | 0        | 0        | Enteric neurons       |
| Mllt11   | 48.66334  | 5.7110972 | 0        | 0        | Enteric neurons       |
| Crmp1    | 48.583736 | 5.3863134 | 0        | 0        | Enteric neurons       |
| Nnat     | 48.205067 | 3.6103685 | 0        | 0        | Enteric neurons       |
| Eml5     | 48.17918  | 7.127553  | 0        | 0        | Enteric neurons       |
| Syt11    | 47.874172 | 5.1314926 | 0        | 0        | Enteric neurons       |
| Hoxa5    | 47.402637 | 4.76242   | 0        | 0        | Enteric neurons       |
| Rtn1     | 47.262177 | 7.3763504 | 0        | 0        | Enteric neurons       |

|               |           |           |           |           |                     |
|---------------|-----------|-----------|-----------|-----------|---------------------|
| Basp1         | 46.16643  | 2.8681867 | 0         | 0         | Enteric neurons     |
| Hoxb5         | 45.844234 | 5.0007477 | 0         | 0         | Enteric neurons     |
| Syt1          | 45.600765 | 7.9778805 | 0         | 0         | Enteric neurons     |
| Hist3h2ba     | 45.036175 | 4.1974792 | 0         | 0         | Enteric neurons     |
| Sox4          | 45.020832 | 2.7132025 | 0         | 0         | Enteric neurons     |
| Kif5c         | 44.832897 | 6.7103686 | 0         | 0         | Enteric neurons     |
| Scg5          | 44.642483 | 5.825138  | 0         | 0         | Enteric neurons     |
| Pcsk1n        | 44.607605 | 7.0079083 | 0         | 0         | Enteric neurons     |
| Jpt1          | 44.448177 | 2.309086  | 0         | 0         | Enteric neurons     |
| Chrna3        | 44.011814 | 7.3566976 | 0         | 0         | Enteric neurons     |
| Ppp1r14b      | 43.881874 | 2.2574308 | 0         | 0         | Enteric neurons     |
| Hoxb4         | 43.784386 | 3.5491917 | 0         | 0         | Enteric neurons     |
| Ptma          | 43.245663 | 1.1219649 | 0         | 0         | Enteric neurons     |
| Hsp90aa1      | 43.215984 | 1.8867742 | 0         | 0         | Enteric neurons     |
| Mxra7         | 43.153572 | 3.0628061 | 0         | 0         | Enteric neurons     |
| H3f3a         | 42.87432  | 1.0327502 | 0         | 0         | Enteric neurons     |
| Tubb5         | 42.411755 | 1.8562682 | 0         | 0         | Enteric neurons     |
| Stmn2         | 42.388763 | 5.107012  | 0         | 0         | Enteric neurons     |
| 2010111I01Rik | 41.821262 | 3.1561828 | 0         | 0         | Enteric neurons     |
| Ttc3          | 41.684284 | 2.1937275 | 0         | 0         | Enteric neurons     |
| Nsg1          | 41.354656 | 3.8168347 | 0         | 0         | Enteric neurons     |
| Miat          | 41.10949  | 6.0150037 | 0         | 0         | Enteric neurons     |
| Mpz           | 27.283978 | 11.103612 | 6.57E-164 | 1.29E-159 | Enteric glial cells |
| Plp1          | 27.101595 | 7.685401  | 9.43E-162 | 9.27E-158 | Enteric glial cells |
| Marcks        | 26.885048 | 3.162971  | 3.29E-159 | 2.15E-155 | Enteric glial cells |
| Mal           | 26.721539 | 10.317742 | 2.65E-157 | 1.30E-153 | Enteric glial cells |
| Col14a1       | 26.44525  | 5.8683157 | 4.14E-154 | 1.63E-150 | Enteric glial cells |
| Sparc         | 26.162613 | 3.833173  | 7.08E-151 | 2.32E-147 | Enteric glial cells |
| Dst           | 26.13424  | 4.8996787 | 1.49E-150 | 4.18E-147 | Enteric glial cells |
| Dbi           | 26.108698 | 3.7195125 | 2.90E-150 | 7.13E-147 | Enteric glial cells |
| Fam198b       | 26.099724 | 5.3876143 | 3.67E-150 | 8.02E-147 | Enteric glial cells |
| Egfl8         | 25.856987 | 8.2407875 | 2.03E-147 | 3.99E-144 | Enteric glial cells |
| Epb41l3       | 25.66215  | 4.8945436 | 3.09E-145 | 5.53E-142 | Enteric glial cells |
| Cryab         | 25.603708 | 5.8107605 | 1.39E-144 | 2.27E-141 | Enteric glial cells |
| Aatk          | 25.554478 | 8.062706  | 4.90E-144 | 7.40E-141 | Enteric glial cells |
| Postn         | 25.318724 | 5.434991  | 1.99E-141 | 2.79E-138 | Enteric glial cells |
| Arpc1b        | 25.268038 | 3.2100618 | 7.18E-141 | 9.40E-138 | Enteric glial cells |
| Zeb2          | 24.999977 | 4.2499356 | 6.12E-138 | 7.51E-135 | Enteric glial cells |
| Serpine2      | 24.986685 | 4.824242  | 8.53E-138 | 9.86E-135 | Enteric glial cells |
| Matn2         | 24.924223 | 5.704742  | 4.07E-137 | 4.44E-134 | Enteric glial cells |
| Sostdc1       | 24.91303  | 8.5320215 | 5.38E-137 | 5.56E-134 | Enteric glial cells |
| Olfml2a       | 24.80466  | 7.489607  | 7.98E-136 | 7.85E-133 | Enteric glial cells |
| Ctnnal1       | 24.692747 | 5.731118  | 1.28E-134 | 1.20E-131 | Enteric glial cells |
| Vim           | 24.62094  | 3.0046082 | 7.54E-134 | 6.73E-131 | Enteric glial cells |
| Pmp22         | 24.55491  | 4.2806535 | 3.83E-133 | 3.28E-130 | Enteric glial cells |
| Ednrb         | 24.4572   | 4.9414783 | 4.22E-132 | 3.45E-129 | Enteric glial cells |
| Abca8a        | 24.268917 | 7.257539  | 4.18E-130 | 3.28E-127 | Enteric glial cells |

|          |           |            |           |           |                                   |
|----------|-----------|------------|-----------|-----------|-----------------------------------|
| Apoe     | 24.239447 | 5.4269185  | 8.54E-130 | 6.46E-127 | Enteric glial cells               |
| Gpm6b    | 24.180456 | 5.5417027  | 3.57E-129 | 2.60E-126 | Enteric glial cells               |
| Mbp      | 24.110035 | 6.448651   | 1.96E-128 | 1.38E-125 | Enteric glial cells               |
| Plekha4  | 23.978676 | 7.6246886  | 4.64E-127 | 3.15E-124 | Enteric glial cells               |
| Cadm4    | 23.804249 | 6.8149347  | 3.02E-125 | 1.98E-122 | Enteric glial cells               |
| Qk       | 23.50397  | 3.2519693  | 3.71E-122 | 2.35E-119 | Enteric glial cells               |
| Col11a1  | 23.344978 | 6.7577424  | 1.55E-120 | 9.52E-118 | Enteric glial cells               |
| Metrn    | 23.270779 | 4.573564   | 8.77E-120 | 5.22E-117 | Enteric glial cells               |
| Sorbs1   | 22.989223 | 4.9358325  | 5.97E-117 | 3.45E-114 | Enteric glial cells               |
| Sema3b   | 22.868118 | 5.853512   | 9.65E-116 | 5.42E-113 | Enteric glial cells               |
| Timp3    | 22.808004 | 3.8692262  | 3.82E-115 | 2.08E-112 | Enteric glial cells               |
| Sfrp1    | 22.800774 | 4.1710753  | 4.50E-115 | 2.39E-112 | Enteric glial cells               |
| Ank3     | 22.696379 | 4.871057   | 4.86E-114 | 2.52E-111 | Enteric glial cells               |
| Cnp      | 22.69439  | 4.757909   | 5.09E-114 | 2.56E-111 | Enteric glial cells               |
| Gas7     | 22.576315 | 5.128048   | 7.41E-113 | 3.64E-110 | Enteric glial cells               |
| Col18a1  | 22.469873 | 3.7687933  | 8.18E-112 | 3.92E-109 | Enteric glial cells               |
| Adam23   | 22.40515  | 7.1119976  | 3.51E-111 | 1.64E-108 | Enteric glial cells               |
| Nid1     | 22.390432 | 3.4950027  | 4.88E-111 | 2.23E-108 | Enteric glial cells               |
| Ttyh1    | 22.385963 | 6.2373543  | 5.39E-111 | 2.41E-108 | Enteric glial cells               |
| Gfra3    | 22.35109  | 8.66082    | 1.18E-110 | 5.15E-108 | Enteric glial cells               |
| Itga6    | 22.313175 | 3.694224   | 2.75E-110 | 1.18E-107 | Enteric glial cells               |
| Lamb1    | 22.079218 | 3.4140563  | 5.01E-108 | 2.08E-105 | Enteric glial cells               |
| Lpar1    | 22.078588 | 4.3204384  | 5.08E-108 | 2.08E-105 | Enteric glial cells               |
| Lama2    | 22.044815 | 6.530158   | 1.07E-107 | 4.30E-105 | Enteric glial cells               |
| Col1a2   | 21.912014 | 4.290551   | 2.00E-106 | 7.84E-104 | Enteric glial cells               |
| Ednrb    | 59.622982 | 5.325398   | 0         | 0         | Enteric neuronal progenitor cells |
| Fabp7    | 57.62774  | 6.900466   | 0         | 0         | Enteric neuronal progenitor cells |
| Tgfb2    | 55.26723  | 4.887304   | 0         | 0         | Enteric neuronal progenitor cells |
| Rbp1     | 55.06415  | 3.5095766  | 0         | 0         | Enteric neuronal progenitor cells |
| Metrn    | 53.553406 | 4.845452   | 0         | 0         | Enteric neuronal progenitor cells |
| Phox2b   | 52.43191  | 5.069202   | 0         | 0         | Enteric neuronal progenitor cells |
| Ckb      | 48.679134 | 3.2287755  | 0         | 0         | Enteric neuronal progenitor cells |
| Lmo4     | 48.67387  | 3.3970656  | 0         | 0         | Enteric neuronal progenitor cells |
| Gfra1    | 48.536484 | 4.8297215  | 0         | 0         | Enteric neuronal progenitor cells |
| Sox10    | 48.154617 | 6.7656217  | 0         | 0         | Enteric neuronal progenitor cells |
| Cdh2     | 47.44174  | 4.0954185  | 0         | 0         | Enteric neuronal progenitor cells |
| Tpt1     | 47.284634 | 0.79696316 | 0         | 0         | Enteric neuronal progenitor cells |
| Foxd3    | 47.2772   | 6.6782517  | 0         | 0         | Enteric neuronal progenitor cells |
| Ccnd1    | 46.887184 | 3.3229575  | 0         | 0         | Enteric neuronal progenitor cells |
| Ppp1r14b | 45.999126 | 2.2684503  | 0         | 0         | Enteric neuronal progenitor cells |
| Ascl1    | 45.686516 | 5.528994   | 0         | 0         | Enteric neuronal progenitor cells |
| Slitrk6  | 45.360466 | 5.3593397  | 0         | 0         | Enteric neuronal progenitor cells |
| Cacng4   | 44.53552  | 4.7372756  | 0         | 0         | Enteric neuronal progenitor cells |
| Cthrc1   | 44.216553 | 3.9713883  | 0         | 0         | Enteric neuronal progenitor cells |
| Hand2    | 44.01606  | 3.138335   | 0         | 0         | Enteric neuronal progenitor cells |
| Erbp3    | 43.83706  | 4.463894   | 0         | 0         | Enteric neuronal progenitor cells |
| Celf2    | 42.34074  | 2.788005   | 0         | 0         | Enteric neuronal progenitor cells |

|               |           |           |           |           |                                   |
|---------------|-----------|-----------|-----------|-----------|-----------------------------------|
| Pcbp4         | 42.04178  | 3.0212636 | 0         | 0         | Enteric neuronal progenitor cells |
| Cnp           | 41.914314 | 4.0177636 | 0         | 0         | Enteric neuronal progenitor cells |
| Tuba1a        | 40.93534  | 2.2729743 | 0         | 0         | Enteric neuronal progenitor cells |
| Chd7          | 40.84152  | 3.1459112 | 0         | 0         | Enteric neuronal progenitor cells |
| Nell2         | 40.47814  | 5.697067  | 0         | 0         | Enteric neuronal progenitor cells |
| Zeb2          | 39.50572  | 2.6162581 | 0         | 0         | Enteric neuronal progenitor cells |
| Wwtr1         | 39.112957 | 2.6017377 | 0         | 0         | Enteric neuronal progenitor cells |
| Gsta4         | 38.87383  | 3.4551632 | 0         | 0         | Enteric neuronal progenitor cells |
| Ldhb          | 38.694412 | 2.5089033 | 0         | 0         | Enteric neuronal progenitor cells |
| Kif21a        | 38.67227  | 3.6072853 | 0         | 0         | Enteric neuronal progenitor cells |
| Syt11         | 38.60189  | 3.8164191 | 0         | 0         | Enteric neuronal progenitor cells |
| Gm12688       | 38.056065 | 6.565499  | 0         | 0         | Enteric neuronal progenitor cells |
| Serpine2      | 37.56713  | 3.2317383 | 0.00E+00  | 4.16E-306 | Enteric neuronal progenitor cells |
| Dnajc1        | 37.50709  | 2.6486366 | 7.06E-308 | 3.85E-305 | Enteric neuronal progenitor cells |
| Ptprz1        | 37.421543 | 5.8486342 | 1.74E-306 | 9.26E-304 | Enteric neuronal progenitor cells |
| Ncam1         | 37.162663 | 2.672295  | 2.74E-302 | 1.42E-299 | Enteric neuronal progenitor cells |
| Tshz1         | 36.98831  | 2.8211102 | 1.77E-299 | 8.89E-297 | Enteric neuronal progenitor cells |
| Marcks        | 36.89556  | 1.6931293 | 5.44E-298 | 2.67E-295 | Enteric neuronal progenitor cells |
| Gpm6b         | 36.82437  | 3.7830915 | 7.52E-297 | 3.61E-294 | Enteric neuronal progenitor cells |
| Sox4          | 36.58367  | 2.0558121 | 5.20E-293 | 2.43E-290 | Enteric neuronal progenitor cells |
| Plp1          | 36.419346 | 5.197176  | 2.10E-290 | 9.61E-288 | Enteric neuronal progenitor cells |
| Tbx3          | 36.367283 | 3.3106582 | 1.40E-289 | 6.26E-287 | Enteric neuronal progenitor cells |
| H2afz         | 35.740765 | 1.5850068 | 9.21E-280 | 4.02E-277 | Enteric neuronal progenitor cells |
| Stmn1         | 35.65634  | 1.876343  | 1.88E-278 | 8.03E-276 | Enteric neuronal progenitor cells |
| Jpt1          | 34.75116  | 1.7584643 | 1.33E-264 | 5.57E-262 | Enteric neuronal progenitor cells |
| E130114P18Rik | 34.476414 | 5.9622893 | 1.81E-260 | 7.41E-258 | Enteric neuronal progenitor cells |
| Pmepa1        | 34.264606 | 2.379778  | 2.64E-257 | 1.06E-254 | Enteric neuronal progenitor cells |
| Zfp536        | 34.22188  | 5.0314007 | 1.14E-256 | 4.49E-254 | Enteric neuronal progenitor cells |
| Upk3b         | 48.758854 | 6.214994  | 0         | 0         | Mesothelial progenitor cells      |
| Igfbp2        | 42.967884 | 4.0254207 | 0         | 0         | Mesothelial progenitor cells      |
| Igfbp5        | 40.86034  | 3.809444  | 0         | 0         | Mesothelial progenitor cells      |
| Upk1b         | 39.471436 | 5.928985  | 0         | 0         | Mesothelial progenitor cells      |
| Wt1           | 39.162865 | 4.573309  | 0         | 0         | Mesothelial progenitor cells      |
| Cryab         | 38.87915  | 4.153923  | 0         | 0         | Mesothelial progenitor cells      |
| Tmem108       | 38.51766  | 4.839414  | 0         | 0         | Mesothelial progenitor cells      |
| Bcam          | 38.26458  | 3.9196124 | 0         | 0         | Mesothelial progenitor cells      |
| Fbln2         | 37.93017  | 3.654816  | 0         | 0         | Mesothelial progenitor cells      |
| Krt19         | 37.16882  | 3.5746374 | 2.18E-302 | 4.28E-299 | Mesothelial progenitor cells      |
| Podxl         | 37.144054 | 3.2161431 | 5.47E-302 | 9.77E-299 | Mesothelial progenitor cells      |
| Nnat          | 36.625175 | 2.9835184 | 1.14E-293 | 1.86E-290 | Mesothelial progenitor cells      |
| Dcn           | 36.51134  | 3.5034578 | 7.33E-292 | 1.11E-288 | Mesothelial progenitor cells      |
| Smim1         | 36.05521  | 3.1238525 | 1.14E-284 | 1.60E-281 | Mesothelial progenitor cells      |
| Pmp22         | 34.910694 | 2.856222  | 5.12E-267 | 6.70E-264 | Mesothelial progenitor cells      |
| Npnt          | 34.74867  | 4.3935766 | 1.45E-264 | 1.78E-261 | Mesothelial progenitor cells      |
| Itm2a         | 34.67071  | 2.8370762 | 2.18E-263 | 2.52E-260 | Mesothelial progenitor cells      |
| Gas1          | 34.6315   | 2.6717925 | 8.48E-263 | 9.26E-260 | Mesothelial progenitor cells      |
| Krt7          | 34.300285 | 3.342193  | 7.77E-258 | 8.04E-255 | Mesothelial progenitor cells      |

|               |           |           |           |           |                                  |
|---------------|-----------|-----------|-----------|-----------|----------------------------------|
| P3h4          | 33.97815  | 3.0559278 | 4.68E-253 | 4.60E-250 | Mesothelial progenitor cells     |
| Myrf          | 33.65168  | 4.621739  | 2.95E-248 | 2.76E-245 | Mesothelial progenitor cells     |
| Alad          | 33.592587 | 2.6925788 | 2.15E-247 | 1.92E-244 | Mesothelial progenitor cells     |
| Slc9a3r1      | 33.478203 | 2.5318992 | 1.00E-245 | 8.55E-243 | Mesothelial progenitor cells     |
| Aprt          | 33.17624  | 1.8714306 | 2.37E-241 | 1.94E-238 | Mesothelial progenitor cells     |
| S100a6        | 33.17156  | 2.7491786 | 2.77E-241 | 2.18E-238 | Mesothelial progenitor cells     |
| Frem2         | 32.80059  | 4.941621  | 5.78E-236 | 4.37E-233 | Mesothelial progenitor cells     |
| Hspb1         | 32.59621  | 3.3329093 | 4.64E-233 | 3.38E-230 | Mesothelial progenitor cells     |
| Gpc3          | 32.269943 | 2.2718372 | 1.85E-228 | 1.30E-225 | Mesothelial progenitor cells     |
| Aldh1a2       | 32.19536  | 4.52092   | 2.05E-227 | 1.39E-224 | Mesothelial progenitor cells     |
| Aebp1         | 31.6777   | 3.1781247 | 3.15E-220 | 2.06E-217 | Mesothelial progenitor cells     |
| Tgm2          | 31.525095 | 3.6196566 | 3.94E-218 | 2.50E-215 | Mesothelial progenitor cells     |
| Tcea19        | 31.251982 | 1.5381082 | 2.10E-214 | 1.29E-211 | Mesothelial progenitor cells     |
| Ezr           | 31.098583 | 2.3740067 | 2.52E-212 | 1.50E-209 | Mesothelial progenitor cells     |
| Tmem151a      | 31.067532 | 5.0934653 | 6.61E-212 | 3.82E-209 | Mesothelial progenitor cells     |
| Dlk1          | 30.972569 | 2.6743052 | 1.26E-210 | 7.09E-208 | Mesothelial progenitor cells     |
| Col3a1        | 30.909296 | 2.7078376 | 8.96E-210 | 4.89E-207 | Mesothelial progenitor cells     |
| Muc16         | 30.887045 | 5.9058266 | 1.78E-209 | 9.47E-207 | Mesothelial progenitor cells     |
| Rcn3          | 30.750904 | 2.1699183 | 1.19E-207 | 6.15E-205 | Mesothelial progenitor cells     |
| C1qtnf4       | 30.58136  | 3.3161764 | 2.17E-205 | 1.09E-202 | Mesothelial progenitor cells     |
| Npm1          | 30.531334 | 1.1789416 | 1.00E-204 | 4.92E-202 | Mesothelial progenitor cells     |
| Cdh3          | 30.16033  | 3.795653  | 7.85E-200 | 3.76E-197 | Mesothelial progenitor cells     |
| Lrrn4         | 30.02374  | 5.295676  | 4.81E-198 | 2.25E-195 | Mesothelial progenitor cells     |
| Col1a2        | 29.910555 | 2.366577  | 1.43E-196 | 6.56E-194 | Mesothelial progenitor cells     |
| Mdk           | 29.811302 | 2.2307448 | 2.79E-195 | 1.25E-192 | Mesothelial progenitor cells     |
| 1810058I24Rik | 29.766428 | 1.5852524 | 1.06E-194 | 4.64E-192 | Mesothelial progenitor cells     |
| Cavin3        | 29.686422 | 2.046383  | 1.15E-193 | 4.91E-191 | Mesothelial progenitor cells     |
| Wfdc2         | 29.685123 | 3.7081885 | 1.19E-193 | 5.00E-191 | Mesothelial progenitor cells     |
| Cnpy2         | 29.561604 | 1.615269  | 4.66E-192 | 1.91E-189 | Mesothelial progenitor cells     |
| Tmem176b      | 29.235659 | 1.652337  | 6.83E-188 | 2.74E-185 | Mesothelial progenitor cells     |
| Col1a1        | 29.174486 | 2.476033  | 4.09E-187 | 1.61E-184 | Mesothelial progenitor cells     |
| Msln          | 38.749584 | 9.953745  | 0         | 0         | Differentiated mesothelial cells |
| S100a6        | 38.449112 | 5.640334  | 0         | 0         | Differentiated mesothelial cells |
| Igfbp6        | 37.976128 | 7.5929823 | 0         | 0         | Differentiated mesothelial cells |
| Crip1         | 37.80899  | 5.5031486 | 0         | 0         | Differentiated mesothelial cells |
| Upk3b         | 37.75611  | 6.6443644 | 0         | 0         | Differentiated mesothelial cells |
| Rarres2       | 37.45369  | 6.086227  | 5.23E-307 | 1.71E-303 | Differentiated mesothelial cells |
| Dcn           | 37.03181  | 6.1704516 | 3.52E-300 | 9.89E-297 | Differentiated mesothelial cells |
| Krt19         | 36.943176 | 5.317848  | 9.37E-299 | 2.30E-295 | Differentiated mesothelial cells |
| Col6a1        | 36.364307 | 4.73578   | 1.56E-289 | 3.41E-286 | Differentiated mesothelial cells |
| Fbln2         | 36.282036 | 5.4059014 | 3.11E-288 | 6.11E-285 | Differentiated mesothelial cells |
| Sparc         | 36.13917  | 3.5951467 | 5.50E-286 | 9.83E-283 | Differentiated mesothelial cells |
| Col3a1        | 35.959774 | 5.4670696 | 3.56E-283 | 5.83E-280 | Differentiated mesothelial cells |
| Aebp1         | 35.923763 | 5.197392  | 1.30E-282 | 1.97E-279 | Differentiated mesothelial cells |
| Col1a1        | 35.805954 | 5.411652  | 8.92E-281 | 1.25E-277 | Differentiated mesothelial cells |
| Cav1          | 35.641113 | 4.5115485 | 3.24E-278 | 4.24E-275 | Differentiated mesothelial cells |
| Efemp1        | 35.0804   | 7.2912116 | 1.34E-269 | 1.65E-266 | Differentiated mesothelial cells |

|          |           |           |           |           |                                  |
|----------|-----------|-----------|-----------|-----------|----------------------------------|
| Col1a2   | 35.002644 | 5.002118  | 2.05E-268 | 2.37E-265 | Differentiated mesothelial cells |
| Igfbp5   | 34.82245  | 4.9740996 | 1.11E-265 | 1.21E-262 | Differentiated mesothelial cells |
| C3       | 34.262028 | 9.324508  | 2.89E-257 | 2.99E-254 | Differentiated mesothelial cells |
| Krt7     | 34.202164 | 4.7298603 | 2.25E-256 | 2.21E-253 | Differentiated mesothelial cells |
| Cavin1   | 33.745846 | 3.6592662 | 1.23E-249 | 1.15E-246 | Differentiated mesothelial cells |
| Col6a2   | 33.638966 | 4.1056223 | 4.52E-248 | 4.04E-245 | Differentiated mesothelial cells |
| Eln      | 33.595097 | 4.281467  | 1.98E-247 | 1.69E-244 | Differentiated mesothelial cells |
| Anxa1    | 33.51692  | 4.78238   | 2.73E-246 | 2.24E-243 | Differentiated mesothelial cells |
| Lrrn4    | 33.446056 | 7.185182  | 2.94E-245 | 2.31E-242 | Differentiated mesothelial cells |
| Upk1b    | 33.417538 | 6.638736  | 7.63E-245 | 5.76E-242 | Differentiated mesothelial cells |
| Gpc3     | 33.215824 | 3.42816   | 6.36E-242 | 4.63E-239 | Differentiated mesothelial cells |
| Wt1      | 33.194447 | 5.0969844 | 1.29E-241 | 9.09E-239 | Differentiated mesothelial cells |
| Laptm4a  | 31.661554 | 2.3247797 | 5.26E-220 | 3.56E-217 | Differentiated mesothelial cells |
| Arhgap29 | 31.622486 | 3.6337223 | 1.81E-219 | 1.19E-216 | Differentiated mesothelial cells |
| Mgp      | 31.540314 | 4.1007986 | 2.43E-218 | 1.54E-215 | Differentiated mesothelial cells |
| Sulf1    | 31.316593 | 4.2705135 | 2.77E-215 | 1.70E-212 | Differentiated mesothelial cells |
| Hspb1    | 31.243008 | 4.4389205 | 2.78E-214 | 1.65E-211 | Differentiated mesothelial cells |
| S100a11  | 30.905134 | 2.6998682 | 1.02E-209 | 5.89E-207 | Differentiated mesothelial cells |
| Gas6     | 30.9014   | 4.0326295 | 1.14E-209 | 6.42E-207 | Differentiated mesothelial cells |
| Col5a2   | 30.77845  | 3.1943707 | 5.09E-208 | 2.78E-205 | Differentiated mesothelial cells |
| Col14a1  | 30.488092 | 4.2691255 | 3.75E-204 | 1.99E-201 | Differentiated mesothelial cells |
| Loxl1    | 30.402378 | 4.0777106 | 5.11E-203 | 2.64E-200 | Differentiated mesothelial cells |
| Ezr      | 30.197239 | 3.268922  | 2.57E-200 | 1.30E-197 | Differentiated mesothelial cells |
| S100a10  | 30.083515 | 2.5677702 | 7.96E-199 | 3.91E-196 | Differentiated mesothelial cells |
| Cdh11    | 29.985939 | 3.4599223 | 1.50E-197 | 7.17E-195 | Differentiated mesothelial cells |
| Lgals3   | 29.973919 | 5.0313272 | 2.15E-197 | 1.00E-194 | Differentiated mesothelial cells |
| Rspo1    | 29.973299 | 5.9444685 | 2.19E-197 | 1.00E-194 | Differentiated mesothelial cells |
| Gpm6a    | 29.796614 | 6.5987644 | 4.32E-195 | 1.93E-192 | Differentiated mesothelial cells |
| Nbl1     | 29.750818 | 4.4064536 | 1.69E-194 | 7.39E-192 | Differentiated mesothelial cells |
| P3h4     | 29.413889 | 3.7422614 | 3.65E-190 | 1.56E-187 | Differentiated mesothelial cells |
| Dlk1     | 29.335226 | 3.6755493 | 3.69E-189 | 1.54E-186 | Differentiated mesothelial cells |
| Aldh1a2  | 29.072218 | 5.1150913 | 8.06E-186 | 3.30E-183 | Differentiated mesothelial cells |
| Col5a1   | 29.02385  | 3.2124689 | 3.29E-185 | 1.32E-182 | Differentiated mesothelial cells |
| Ahnak    | 28.854944 | 2.888742  | 4.39E-183 | 1.73E-180 | Differentiated mesothelial cells |
| Tmsb4x   | 77.4404   | 2.7611694 | 0         | 0         | Macrophages-1                    |
| Fcer1g   | 76.10649  | 8.235345  | 0         | 0         | Macrophages-1                    |
| Tyrobp   | 75.112755 | 8.098489  | 0         | 0         | Macrophages-1                    |
| Apoe     | 68.94213  | 6.752044  | 0         | 0         | Macrophages-1                    |
| Coro1a   | 67.83591  | 6.782404  | 0         | 0         | Macrophages-1                    |
| Cst3     | 67.01098  | 3.156911  | 0         | 0         | Macrophages-1                    |
| Cyba     | 66.126595 | 3.3167388 | 0         | 0         | Macrophages-1                    |
| Ctss     | 63.977787 | 6.4094663 | 0         | 0         | Macrophages-1                    |
| Rac2     | 63.5765   | 7.3107696 | 0         | 0         | Macrophages-1                    |
| Cd52     | 62.354317 | 6.943082  | 0         | 0         | Macrophages-1                    |
| Lst1     | 61.942978 | 6.654906  | 0         | 0         | Macrophages-1                    |
| Arhgdib  | 61.38649  | 4.7557435 | 0         | 0         | Macrophages-1                    |
| Laptm5   | 61.140102 | 6.44515   | 0         | 0         | Macrophages-1                    |



|          |           |            |           |           |               |
|----------|-----------|------------|-----------|-----------|---------------|
| C1qb     | 61.08476  | 7.3101907  | 0         | 0         | Macrophages-1 |
| Ctsc     | 60.837868 | 5.23919    | 0         | 0         | Macrophages-1 |
| Aif1     | 60.268826 | 6.708236   | 0         | 0         | Macrophages-1 |
| Ly86     | 59.88904  | 6.9793825  | 0         | 0         | Macrophages-1 |
| B2m      | 59.551434 | 2.8958833  | 0         | 0         | Macrophages-1 |
| Fth1     | 59.333523 | 1.7365551  | 0         | 0         | Macrophages-1 |
| C1qc     | 58.89426  | 7.1607995  | 0         | 0         | Macrophages-1 |
| Spi1     | 58.837257 | 6.8099194  | 0         | 0         | Macrophages-1 |
| Fcgr3    | 58.69424  | 6.854046   | 0         | 0         | Macrophages-1 |
| Ftl1     | 57.346676 | 1.6298988  | 0         | 0         | Macrophages-1 |
| Ptpn18   | 56.46074  | 4.072212   | 0         | 0         | Macrophages-1 |
| Ms4a6c   | 56.284958 | 6.722319   | 0         | 0         | Macrophages-1 |
| Lyz2     | 56.219357 | 6.452283   | 0         | 0         | Macrophages-1 |
| Csf1r    | 55.88633  | 5.3697114  | 0         | 0         | Macrophages-1 |
| Ctla     | 55.674263 | 1.8920282  | 0         | 0         | Macrophages-1 |
| Psap     | 55.57336  | 3.0413165  | 0         | 0         | Macrophages-1 |
| C1qa     | 55.513226 | 6.9790397  | 0         | 0         | Macrophages-1 |
| Gmfg     | 54.86484  | 4.1827483  | 0         | 0         | Macrophages-1 |
| Actb     | 54.012596 | 1.2676115  | 0         | 0         | Macrophages-1 |
| Ctsb     | 54.010014 | 2.953879   | 0         | 0         | Macrophages-1 |
| Lgmn     | 53.859512 | 4.375999   | 0         | 0         | Macrophages-1 |
| Sh3bgrl3 | 53.827415 | 2.04106    | 0         | 0         | Macrophages-1 |
| Unc93b1  | 53.603565 | 4.8725743  | 0         | 0         | Macrophages-1 |
| Arpc1b   | 52.811974 | 2.1753645  | 0         | 0         | Macrophages-1 |
| Fau      | 52.51823  | 0.95210224 | 0         | 0         | Macrophages-1 |
| Ms4a6b   | 51.680187 | 6.420207   | 0         | 0         | Macrophages-1 |
| Itm2b    | 51.106293 | 1.9658134  | 0         | 0         | Macrophages-1 |
| Rgs10    | 50.67765  | 3.7026494  | 0         | 0         | Macrophages-1 |
| Ctsh     | 50.14758  | 4.060067   | 0         | 0         | Macrophages-1 |
| Cd68     | 49.9106   | 6.16043    | 0         | 0         | Macrophages-1 |
| Lcp1     | 49.861725 | 3.4182224  | 0         | 0         | Macrophages-1 |
| Pld4     | 49.76825  | 6.6382613  | 0         | 0         | Macrophages-1 |
| Cotl1    | 49.429775 | 2.3590887  | 0         | 0         | Macrophages-1 |
| Fyb      | 48.806244 | 5.770856   | 0         | 0         | Macrophages-1 |
| Cd53     | 48.700306 | 6.5143495  | 0         | 0         | Macrophages-1 |
| Pf4      | 47.628403 | 7.0783167  | 0         | 0         | Macrophages-1 |
| Psmb8    | 46.956417 | 4.452586   | 0         | 0         | Macrophages-1 |
| Ctss     | 34.6019   | 7.585671   | 2.37E-262 | 4.65E-258 | Macrophages-2 |
| Cd74     | 34.49518  | 10.031071  | 9.47E-261 | 9.31E-257 | Macrophages-2 |
| Psap     | 34.300953 | 4.9357224  | 7.60E-258 | 4.98E-254 | Macrophages-2 |
| C1qc     | 34.220596 | 7.630758   | 1.19E-256 | 5.87E-253 | Macrophages-2 |
| Apoe     | 34.0742   | 7.8429947  | 1.78E-254 | 6.99E-251 | Macrophages-2 |
| C1qb     | 33.971947 | 7.5637603  | 5.78E-253 | 1.89E-249 | Macrophages-2 |
| C1qa     | 33.910557 | 7.617849   | 4.66E-252 | 1.31E-248 | Macrophages-2 |
| Ctsc     | 33.630558 | 5.9113193  | 6.00E-248 | 1.47E-244 | Macrophages-2 |
| H2-Ab1   | 33.46984  | 9.090098   | 1.32E-245 | 2.89E-242 | Macrophages-2 |
| H2-Aa    | 33.223198 | 9.560768   | 4.98E-242 | 9.78E-239 | Macrophages-2 |

|          |           |           |           |           |               |
|----------|-----------|-----------|-----------|-----------|---------------|
| Aif1     | 33.14279  | 6.441567  | 7.19E-241 | 1.29E-237 | Macrophages-2 |
| Cd52     | 33.12272  | 6.661426  | 1.40E-240 | 2.29E-237 | Macrophages-2 |
| Tyrobp   | 33.063034 | 6.6371627 | 1.01E-239 | 1.53E-236 | Macrophages-2 |
| Csf1r    | 32.711105 | 5.9867425 | 1.09E-234 | 1.52E-231 | Macrophages-2 |
| H2-Eb1   | 32.70291  | 9.081044  | 1.42E-234 | 1.86E-231 | Macrophages-2 |
| Lgmn     | 32.626312 | 5.5331955 | 1.74E-233 | 2.13E-230 | Macrophages-2 |
| Pla2g7   | 32.32107  | 7.282564  | 3.54E-229 | 4.09E-226 | Macrophages-2 |
| Fcer1g   | 32.29009  | 6.4554167 | 9.64E-229 | 1.05E-225 | Macrophages-2 |
| Tmsb4x   | 32.238052 | 2.6960335 | 5.17E-228 | 5.35E-225 | Macrophages-2 |
| Unc93b1  | 31.856625 | 5.4557266 | 1.07E-222 | 1.05E-219 | Macrophages-2 |
| Ctsh     | 31.7263   | 5.2454886 | 6.74E-221 | 6.31E-218 | Macrophages-2 |
| H2-DMa   | 31.513723 | 7.0913157 | 5.63E-218 | 5.03E-215 | Macrophages-2 |
| Adamdec1 | 31.504217 | 7.616871  | 7.60E-218 | 6.50E-215 | Macrophages-2 |
| Ccl24    | 31.253445 | 7.810197  | 2.00E-214 | 1.64E-211 | Macrophages-2 |
| Coro1a   | 31.023195 | 5.357899  | 2.62E-211 | 2.06E-208 | Macrophages-2 |
| B2m      | 31.011305 | 3.4567804 | 3.80E-211 | 2.87E-208 | Macrophages-2 |
| Fcgr3    | 30.981724 | 5.7641735 | 9.50E-211 | 6.92E-208 | Macrophages-2 |
| Man2b1   | 30.833279 | 4.2396226 | 9.39E-209 | 6.59E-206 | Macrophages-2 |
| Tspan13  | 30.676609 | 3.766786  | 1.17E-206 | 7.91E-204 | Macrophages-2 |
| Ms4a6c   | 30.671333 | 6.043811  | 1.37E-206 | 8.99E-204 | Macrophages-2 |
| AW112010 | 30.577806 | 7.17225   | 2.41E-205 | 1.53E-202 | Macrophages-2 |
| Mpeg1    | 30.494146 | 6.5635624 | 3.12E-204 | 1.91E-201 | Macrophages-2 |
| Lyz2     | 30.390863 | 5.423932  | 7.25E-203 | 4.32E-200 | Macrophages-2 |
| Ms4a6b   | 30.379358 | 5.8341184 | 1.03E-202 | 5.95E-200 | Macrophages-2 |
| Gm2a     | 30.335781 | 5.223245  | 3.87E-202 | 2.17E-199 | Macrophages-2 |
| Ly6e     | 30.315226 | 4.0799294 | 7.22E-202 | 3.94E-199 | Macrophages-2 |
| Ly86     | 30.125246 | 5.703745  | 2.26E-199 | 1.20E-196 | Macrophages-2 |
| Prdx5    | 29.954975 | 3.1876502 | 3.79E-197 | 1.96E-194 | Macrophages-2 |
| Ctsb     | 29.92919  | 3.3401105 | 8.21E-197 | 4.14E-194 | Macrophages-2 |
| Mafb     | 29.905724 | 5.09575   | 1.66E-196 | 8.15E-194 | Macrophages-2 |
| Sat1     | 29.809916 | 3.6450655 | 2.91E-195 | 1.39E-192 | Macrophages-2 |
| Gatm     | 29.775366 | 5.019974  | 8.14E-195 | 3.81E-192 | Macrophages-2 |
| Spi1     | 29.74259  | 5.4348254 | 2.16E-194 | 9.88E-192 | Macrophages-2 |
| Lst1     | 29.55362  | 5.27855   | 5.90E-192 | 2.64E-189 | Macrophages-2 |
| Ptprc    | 29.465433 | 6.1264563 | 7.99E-191 | 3.49E-188 | Macrophages-2 |
| Npc2     | 29.289637 | 2.695033  | 1.41E-188 | 6.00E-186 | Macrophages-2 |
| Fth1     | 29.272675 | 2.0264626 | 2.31E-188 | 9.66E-186 | Macrophages-2 |
| Ms4a6d   | 29.239248 | 6.022433  | 6.15E-188 | 2.52E-185 | Macrophages-2 |
| Cyba     | 29.173658 | 3.0309594 | 4.19E-187 | 1.68E-184 | Macrophages-2 |
| Lpcat2   | 29.07049  | 5.9942017 | 8.48E-186 | 3.33E-183 | Macrophages-2 |
| Hba-a1   | 29.42806  | 12.496491 | 2.40E-190 | 2.51E-186 | Erythrocytes  |
| Hba-a2   | 29.42599  | 12.359651 | 2.55E-190 | 2.51E-186 | Erythrocytes  |
| Hbb-bt   | 29.204794 | 12.01571  | 1.69E-187 | 1.10E-183 | Erythrocytes  |
| Hbb-bs   | 28.465912 | 10.69772  | 3.10E-178 | 1.52E-174 | Erythrocytes  |
| Fth1     | 26.281044 | 2.9835837 | 3.16E-152 | 1.24E-148 | Erythrocytes  |
| Alas2    | 23.13419  | 11.091679 | 2.10E-118 | 1.72E-115 | Erythrocytes  |
| Ftl1     | 21.960766 | 1.6956807 | 6.83E-107 | 3.53E-104 | Erythrocytes  |

|          |            |            |          |          |              |
|----------|------------|------------|----------|----------|--------------|
| Hbb-y    | 20.733438  | 9.706763   | 1.73E-95 | 6.18E-93 | Erythrocytes |
| Bpgm     | 20.397833  | 4.8840203  | 1.75E-92 | 5.20E-90 | Erythrocytes |
| Hba-x    | 20.291992  | 10.382186  | 1.51E-91 | 4.19E-89 | Erythrocytes |
| Blvrb    | 19.848158  | 3.5787628  | 1.14E-87 | 2.96E-85 | Erythrocytes |
| Gpx1     | 18.41803   | 2.9854677  | 9.42E-76 | 1.65E-73 | Erythrocytes |
| Prdx2    | 18.027212  | 1.6910319  | 1.19E-72 | 1.87E-70 | Erythrocytes |
| Car2     | 17.924929  | 6.2123623  | 7.53E-72 | 1.13E-69 | Erythrocytes |
| Hbb-bh1  | 17.856838  | 10.456967  | 2.56E-71 | 3.75E-69 | Erythrocytes |
| Nudt4    | 17.29021   | 3.8088634  | 5.57E-67 | 7.45E-65 | Erythrocytes |
| Slc4a1   | 17.277695  | 11.046378  | 6.93E-67 | 9.13E-65 | Erythrocytes |
| Fam210b  | 16.514507  | 4.765595   | 2.89E-61 | 3.03E-59 | Erythrocytes |
| Creg1    | 16.076473  | 3.2699144  | 3.73E-58 | 3.44E-56 | Erythrocytes |
| Fech     | 15.780026  | 4.11633    | 4.27E-56 | 3.53E-54 | Erythrocytes |
| Snca     | 15.584298  | 6.7965684  | 9.31E-55 | 7.06E-53 | Erythrocytes |
| Fam46c   | 15.450652  | 6.504288   | 7.47E-54 | 5.48E-52 | Erythrocytes |
| Slc25a37 | 14.740357  | 4.9791512  | 3.55E-49 | 2.09E-47 | Erythrocytes |
| Gclm     | 14.1354685 | 2.846137   | 2.30E-45 | 1.16E-43 | Erythrocytes |
| Ube2l6   | 14.062289  | 4.802167   | 6.48E-45 | 3.21E-43 | Erythrocytes |
| Mkfn1    | 13.627349  | 3.7558036  | 2.75E-42 | 1.22E-40 | Erythrocytes |
| Epb41    | 13.506338  | 3.3828459  | 1.43E-41 | 6.22E-40 | Erythrocytes |
| Gypa     | 11.286525  | 9.756786   | 1.53E-29 | 3.97E-28 | Erythrocytes |
| Gm42418  | 11.173034  | 1.1150085  | 5.53E-29 | 1.39E-27 | Erythrocytes |
| Pdzk1ip1 | 10.9555855 | 3.1418173  | 6.25E-28 | 1.50E-26 | Erythrocytes |
| Rhd      | 10.702056  | 9.9813385  | 9.95E-27 | 2.25E-25 | Erythrocytes |
| Hsd3b6   | 10.610274  | 11.048098  | 2.67E-26 | 5.93E-25 | Erythrocytes |
| 2-Mar    | 10.4626665 | 2.679516   | 1.28E-25 | 2.73E-24 | Erythrocytes |
| Bnip3l   | 10.023657  | 1.4121541  | 1.20E-23 | 2.34E-22 | Erythrocytes |
| Ermap    | 9.768      | 8.744655   | 1.54E-22 | 2.83E-21 | Erythrocytes |
| Kel      | 9.601904   | 11.12177   | 7.85E-22 | 1.37E-20 | Erythrocytes |
| Oaz1     | 9.292808   | 0.69919336 | 1.50E-20 | 2.44E-19 | Erythrocytes |
| Tmcc2    | 9.153021   | 4.447661   | 5.54E-20 | 8.69E-19 | Erythrocytes |
| Trim10   | 8.996066   | 11.539749  | 2.34E-19 | 3.54E-18 | Erythrocytes |
| Pim1     | 8.247742   | 2.7787302  | 1.61E-16 | 2.06E-15 | Erythrocytes |
| Glrx5    | 8.191169   | 1.2982198  | 2.59E-16 | 3.24E-15 | Erythrocytes |
| Ppp1r15a | 8.113387   | 3.20106    | 4.92E-16 | 6.04E-15 | Erythrocytes |
| Pabpc1   | 7.970064   | 0.7166131  | 1.59E-15 | 1.87E-14 | Erythrocytes |
| Hmbs     | 7.767945   | 2.066567   | 7.98E-15 | 8.94E-14 | Erythrocytes |
| Ube2o    | 7.5791807  | 3.1037362  | 3.48E-14 | 3.76E-13 | Erythrocytes |
| Cd59a    | 7.5112133  | 2.8937314  | 5.86E-14 | 6.23E-13 | Erythrocytes |
| Fam220a  | 7.355246   | 2.5990536  | 1.91E-13 | 1.95E-12 | Erythrocytes |
| Nt5c3    | 7.251903   | 2.308122   | 4.11E-13 | 4.11E-12 | Erythrocytes |
| Tspo2    | 7.027985   | 8.459726   | 2.10E-12 | 1.98E-11 | Erythrocytes |
| Rbm38    | 6.604775   | 3.0701199  | 3.98E-11 | 3.34E-10 | Erythrocytes |

**Table S2:** Differential gene expression analysis results for top 50 gene markers for all mesenchymal cell types in the small intestinal musculature scRNA-seq data.

**Table S2:**

| Small intestine musculature cell type markers |            |                |           |           |                           |
|-----------------------------------------------|------------|----------------|-----------|-----------|---------------------------|
| names                                         | scores     | logfoldchanges | pvals     | pvals_adj | celltypes                 |
| Isl1                                          | 26.858887  | 4.905148       | 6.64E-159 | 6.53E-155 | Mesenchymal progenitors-1 |
| Peg3                                          | 25.508183  | 1.8861797      | 1.60E-143 | 1.05E-139 | Mesenchymal progenitors-1 |
| Nnat                                          | 23.692251  | 1.9364665      | 4.33E-124 | 1.70E-120 | Mesenchymal progenitors-1 |
| Stmn2                                         | 23.56522   | 3.3697066      | 8.77E-123 | 2.87E-119 | Mesenchymal progenitors-1 |
| Palld                                         | 23.25425   | 1.9439565      | 1.29E-119 | 3.62E-116 | Mesenchymal progenitors-1 |
| Sfrp1                                         | 22.56248   | 1.6866161      | 1.01E-112 | 2.49E-109 | Mesenchymal progenitors-1 |
| Nr2f2                                         | 21.943539  | 1.4336491      | 9.98E-107 | 2.18E-103 | Mesenchymal progenitors-1 |
| Capn6                                         | 21.929276  | 2.1726575      | 1.37E-106 | 2.68E-103 | Mesenchymal progenitors-1 |
| Pitx2                                         | 20.617445  | 3.2603903      | 1.91E-94  | 3.42E-91  | Mesenchymal progenitors-1 |
| Hsp90ab1                                      | 20.107424  | 0.686816       | 6.35E-90  | 9.61E-87  | Mesenchymal progenitors-1 |
| Tac2                                          | 19.576954  | 3.6341603      | 2.43E-85  | 3.19E-82  | Mesenchymal progenitors-1 |
| Igf1                                          | 19.38159   | 1.596314       | 1.10E-83  | 1.36E-80  | Mesenchymal progenitors-1 |
| Ncam1                                         | 19.192003  | 1.4705824      | 4.32E-82  | 4.99E-79  | Mesenchymal progenitors-1 |
| Unc5c                                         | 19.019835  | 1.9966387      | 1.17E-80  | 1.28E-77  | Mesenchymal progenitors-1 |
| Zfhx4                                         | 18.590439  | 1.4768733      | 3.84E-77  | 3.97E-74  | Mesenchymal progenitors-1 |
| Abcg2                                         | 18.379238  | 1.9944003      | 1.93E-75  | 1.89E-72  | Mesenchymal progenitors-1 |
| mt-Nd4l                                       | 18.355783  | 1.3428615      | 2.97E-75  | 2.78E-72  | Mesenchymal progenitors-1 |
| Prnp                                          | 18.343693  | 1.5215296      | 3.71E-75  | 3.31E-72  | Mesenchymal progenitors-1 |
| Mif                                           | 18.326105  | 1.046231       | 5.12E-75  | 4.38E-72  | Mesenchymal progenitors-1 |
| 6330403K07Rik                                 | 18.149532  | 1.251263       | 1.29E-73  | 1.06E-70  | Mesenchymal progenitors-1 |
| Csrp2                                         | 18.14384   | 1.2091146      | 1.44E-73  | 1.13E-70  | Mesenchymal progenitors-1 |
| Mtch1                                         | 17.755987  | 0.9795887      | 1.55E-70  | 1.17E-67  | Mesenchymal progenitors-1 |
| Scrn1                                         | 17.589123  | 3.3199053      | 2.98E-69  | 2.17E-66  | Mesenchymal progenitors-1 |
| Cxcl13                                        | 17.126991  | 3.0622718      | 9.34E-66  | 6.33E-63  | Mesenchymal progenitors-1 |
| Tnfaip8                                       | 16.988089  | 1.3921928      | 1.01E-64  | 6.59E-62  | Mesenchymal progenitors-1 |
| Mdk                                           | 16.7902    | 0.84231925     | 2.88E-63  | 1.77E-60  | Mesenchymal progenitors-1 |
| Igfbp5                                        | 16.540018  | 1.3059584      | 1.89E-61  | 1.13E-58  | Mesenchymal progenitors-1 |
| Adamts1                                       | 16.512463  | 1.9370743      | 2.98E-61  | 1.73E-58  | Mesenchymal progenitors-1 |
| Tnc                                           | 16.312477  | 2.526372       | 8.05E-60  | 4.52E-57  | Mesenchymal progenitors-1 |
| Mmp16                                         | 16.004185  | 1.8206564      | 1.19E-57  | 6.35E-55  | Mesenchymal progenitors-1 |
| Cux2                                          | 15.93571   | 2.158107       | 3.58E-57  | 1.85E-54  | Mesenchymal progenitors-1 |
| Rps7                                          | 15.3624935 | 0.505355       | 2.92E-53  | 1.40E-50  | Mesenchymal progenitors-1 |
| Adgrl3                                        | 15.049983  | 1.8204485      | 3.45E-51  | 1.54E-48  | Mesenchymal progenitors-1 |
| Hmga2                                         | 14.998642  | 1.67256        | 7.49E-51  | 3.27E-48  | Mesenchymal progenitors-1 |
| Cxcl12                                        | 14.98065   | 1.0651245      | 9.83E-51  | 4.20E-48  | Mesenchymal progenitors-1 |
| Bex3                                          | 14.972045  | 0.7934023      | 1.12E-50  | 4.68E-48  | Mesenchymal progenitors-1 |
| Ntm                                           | 14.765787  | 2.2876954      | 2.43E-49  | 9.97E-47  | Mesenchymal progenitors-1 |
| Fam198b                                       | 14.675321  | 2.640863       | 9.28E-49  | 3.65E-46  | Mesenchymal progenitors-1 |
| Set                                           | 14.665883  | 0.68690073     | 1.07E-48  | 4.11E-46  | Mesenchymal progenitors-1 |
| Sulf2                                         | 14.590967  | 1.0031513      | 3.21E-48  | 1.21E-45  | Mesenchymal progenitors-1 |
| Gata6                                         | 14.588172  | 1.386048       | 3.34E-48  | 1.24E-45  | Mesenchymal progenitors-1 |
| Kif26b                                        | 14.554781  | 2.5649695      | 5.45E-48  | 1.98E-45  | Mesenchymal progenitors-1 |
| Npm1                                          | 14.529127  | 0.56530786     | 7.92E-48  | 2.83E-45  | Mesenchymal progenitors-1 |
| Prdx2                                         | 14.459044  | 0.63339627     | 2.20E-47  | 7.71E-45  | Mesenchymal progenitors-1 |

|         |           |            |           |           |                           |
|---------|-----------|------------|-----------|-----------|---------------------------|
| Anp32a  | 14.333595 | 0.9578102  | 1.35E-46  | 4.65E-44  | Mesenchymal progenitors-1 |
| Runx1t1 | 14.224085 | 1.2054642  | 6.49E-46  | 2.13E-43  | Mesenchymal progenitors-1 |
| Hnrnpc  | 14.101229 | 0.82769376 | 3.73E-45  | 1.16E-42  | Mesenchymal progenitors-1 |
| Rps11   | 14.051917 | 0.32404253 | 7.50E-45  | 2.30E-42  | Mesenchymal progenitors-1 |
| Rpl7a   | 13.914193 | 0.7332692  | 5.19E-44  | 1.55E-41  | Mesenchymal progenitors-1 |
| Angpt1  | 13.913132 | 2.0563998  | 5.27E-44  | 1.55E-41  | Mesenchymal progenitors-1 |
| Mdk     | 35.873814 | 1.218615   | 7.82E-282 | 1.54E-277 | Mesenchymal progenitors-2 |
| Ptn     | 35.34815  | 1.3921417  | 1.07E-273 | 1.05E-269 | Mesenchymal progenitors-2 |
| Cdkn1c  | 35.126724 | 1.3007306  | 2.64E-270 | 1.73E-266 | Mesenchymal progenitors-2 |
| Sfrp2   | 29.608776 | 1.9731007  | 1.15E-192 | 5.66E-189 | Mesenchymal progenitors-2 |
| Calr    | 27.89462  | 1.0373204  | 3.10E-171 | 1.22E-167 | Mesenchymal progenitors-2 |
| Rpl12   | 27.105158 | 0.5815119  | 8.56E-162 | 2.80E-158 | Mesenchymal progenitors-2 |
| Rpl14   | 26.73997  | 0.5361936  | 1.62E-157 | 4.53E-154 | Mesenchymal progenitors-2 |
| Rps19   | 26.60864  | 0.5836611  | 5.39E-156 | 1.32E-152 | Mesenchymal progenitors-2 |
| Sulf2   | 26.306936 | 1.3790835  | 1.60E-152 | 3.49E-149 | Mesenchymal progenitors-2 |
| Rps23   | 26.120115 | 0.61122495 | 2.15E-150 | 4.23E-147 | Mesenchymal progenitors-2 |
| Rpl27a  | 25.654322 | 0.45712432 | 3.78E-145 | 6.20E-142 | Mesenchymal progenitors-2 |
| Rpl13   | 25.208975 | 0.4056025  | 3.19E-140 | 4.83E-137 | Mesenchymal progenitors-2 |
| Rpl32   | 24.834528 | 0.48112136 | 3.80E-136 | 5.33E-133 | Mesenchymal progenitors-2 |
| Rps10   | 24.814005 | 0.45879033 | 6.33E-136 | 8.29E-133 | Mesenchymal progenitors-2 |
| Rpl19   | 24.75366  | 0.5570034  | 2.83E-135 | 3.48E-132 | Mesenchymal progenitors-2 |
| Rps18   | 24.592133 | 0.6695748  | 1.53E-133 | 1.77E-130 | Mesenchymal progenitors-2 |
| Rps17   | 24.455431 | 0.57831687 | 4.41E-132 | 4.81E-129 | Mesenchymal progenitors-2 |
| Lgals1  | 24.22944  | 0.73610336 | 1.09E-129 | 1.07E-126 | Mesenchymal progenitors-2 |
| Rps13   | 24.070684 | 0.49189126 | 5.07E-128 | 4.75E-125 | Mesenchymal progenitors-2 |
| Rps15a  | 24.051119 | 0.45233122 | 8.13E-128 | 7.26E-125 | Mesenchymal progenitors-2 |
| Rpl28   | 23.971905 | 0.43181145 | 5.46E-127 | 4.67E-124 | Mesenchymal progenitors-2 |
| Rps20   | 23.872688 | 0.3939113  | 5.89E-126 | 4.82E-123 | Mesenchymal progenitors-2 |
| Slit2   | 23.812807 | 1.3568157  | 2.46E-125 | 1.93E-122 | Mesenchymal progenitors-2 |
| Rpl11   | 23.475216 | 0.60496306 | 7.31E-122 | 5.32E-119 | Mesenchymal progenitors-2 |
| Eef1b2  | 23.215904 | 0.733394   | 3.15E-119 | 2.21E-116 | Mesenchymal progenitors-2 |
| Rpl18   | 23.147524 | 0.620622   | 1.54E-118 | 1.04E-115 | Mesenchymal progenitors-2 |
| Rpl26   | 22.9614   | 0.43589354 | 1.13E-116 | 7.43E-114 | Mesenchymal progenitors-2 |
| Tmsb10  | 22.792862 | 0.68991345 | 5.40E-115 | 3.42E-112 | Mesenchymal progenitors-2 |
| Rps14   | 22.57606  | 0.62598956 | 7.45E-113 | 4.58E-110 | Mesenchymal progenitors-2 |
| Rps27a  | 22.530386 | 0.41040206 | 2.09E-112 | 1.25E-109 | Mesenchymal progenitors-2 |
| Pdia6   | 22.284115 | 0.8967081  | 5.27E-110 | 3.05E-107 | Mesenchymal progenitors-2 |
| Csrp2   | 22.125822 | 1.1419438  | 1.78E-108 | 1.00E-105 | Mesenchymal progenitors-2 |
| Eef1g   | 22.02815  | 0.850932   | 1.55E-107 | 8.45E-105 | Mesenchymal progenitors-2 |
| Rps15   | 21.893759 | 0.5011342  | 2.98E-106 | 1.58E-103 | Mesenchymal progenitors-2 |
| Rps11   | 21.724335 | 0.40908927 | 1.21E-104 | 6.09E-102 | Mesenchymal progenitors-2 |
| Rps24   | 21.518728 | 0.3204036  | 1.04E-102 | 5.11E-100 | Mesenchymal progenitors-2 |
| Rps25   | 21.414408 | 0.45857945 | 9.81E-102 | 4.70E-99  | Mesenchymal progenitors-2 |
| Rps8    | 21.06925  | 0.36857876 | 1.52E-98  | 6.65E-96  | Mesenchymal progenitors-2 |
| Rpl2211 | 20.980295 | 0.5913727  | 9.93E-98  | 4.24E-95  | Mesenchymal progenitors-2 |
| Ppib    | 20.915401 | 0.66077036 | 3.88E-97  | 1.59E-94  | Mesenchymal progenitors-2 |
| Rps16   | 20.762815 | 0.48329863 | 9.39E-96  | 3.69E-93  | Mesenchymal progenitors-2 |

|          |            |            |          |          |                           |
|----------|------------|------------|----------|----------|---------------------------|
| Rpl23    | 20.544868  | 0.36890954 | 8.55E-94 | 3.30E-91 | Mesenchymal progenitors-2 |
| Marcks   | 20.54283   | 0.76938057 | 8.92E-94 | 3.37E-91 | Mesenchymal progenitors-2 |
| Dad1     | 20.500282  | 0.7805883  | 2.14E-93 | 7.94E-91 | Mesenchymal progenitors-2 |
| Dlk1     | 20.380707  | 0.98953474 | 2.48E-92 | 9.03E-90 | Mesenchymal progenitors-2 |
| Id3      | 20.305168  | 1.1276157  | 1.16E-91 | 4.14E-89 | Mesenchymal progenitors-2 |
| Rplp1    | 20.159838  | 0.4146724  | 2.21E-90 | 7.61E-88 | Mesenchymal progenitors-2 |
| Rpl18a   | 20.133692  | 0.51141804 | 3.74E-90 | 1.27E-87 | Mesenchymal progenitors-2 |
| Rpl41    | 20.126467  | 0.46229905 | 4.33E-90 | 1.44E-87 | Mesenchymal progenitors-2 |
| Mif      | 19.921263  | 0.9039041  | 2.66E-88 | 8.72E-86 | Mesenchymal progenitors-2 |
| Wnt4     | 17.47528   | 2.4254398  | 2.21E-68 | 4.34E-64 | Mesenchymal progenitors-3 |
| Tubb5    | 16.889206  | 1.0259817  | 5.40E-64 | 5.31E-60 | Mesenchymal progenitors-3 |
| Fabp5    | 16.837751  | 1.5860473  | 1.29E-63 | 8.45E-60 | Mesenchymal progenitors-3 |
| Ptma     | 15.768492  | 0.54897654 | 5.13E-56 | 2.52E-52 | Mesenchymal progenitors-3 |
| Cdc7     | 15.746746  | 1.9709287  | 7.23E-56 | 2.84E-52 | Mesenchymal progenitors-3 |
| Ppia     | 15.145021  | 0.5131448  | 8.17E-52 | 2.68E-48 | Mesenchymal progenitors-3 |
| Ybx1     | 15.005781  | 0.6988501  | 6.73E-51 | 1.89E-47 | Mesenchymal progenitors-3 |
| H2afz    | 14.551476  | 1.1007379  | 5.72E-48 | 1.12E-44 | Mesenchymal progenitors-3 |
| Ran      | 14.495257  | 0.94101727 | 1.30E-47 | 2.32E-44 | Mesenchymal progenitors-3 |
| Rpsa     | 14.209553  | 0.5347843  | 7.99E-46 | 1.21E-42 | Mesenchymal progenitors-3 |
| Ccl11    | 14.104558  | 2.4102883  | 3.56E-45 | 4.66E-42 | Mesenchymal progenitors-3 |
| Pclaf    | 14.00606   | 2.0962923  | 1.43E-44 | 1.76E-41 | Mesenchymal progenitors-3 |
| Jag1     | 13.891552  | 1.6165274  | 7.13E-44 | 8.24E-41 | Mesenchymal progenitors-3 |
| Hsp90aa1 | 13.827956  | 0.825944   | 1.73E-43 | 1.89E-40 | Mesenchymal progenitors-3 |
| Eif5a    | 13.552082  | 0.83299357 | 7.70E-42 | 7.97E-39 | Mesenchymal progenitors-3 |
| Ranbp1   | 13.503243  | 0.9531882  | 1.50E-41 | 1.47E-38 | Mesenchymal progenitors-3 |
| Rbm3     | 13.41821   | 0.6524041  | 4.73E-41 | 4.43E-38 | Mesenchymal progenitors-3 |
| 7-Sep    | 13.405351  | 0.9021831  | 5.63E-41 | 4.81E-38 | Mesenchymal progenitors-3 |
| Heyl     | 13.180256  | 2.210717   | 1.14E-39 | 9.34E-37 | Mesenchymal progenitors-3 |
| Stmn1    | 12.9887905 | 1.1522387  | 1.42E-38 | 1.11E-35 | Mesenchymal progenitors-3 |
| Nr2f2    | 12.960137  | 1.0638602  | 2.06E-38 | 1.56E-35 | Mesenchymal progenitors-3 |
| Gnas     | 12.884535  | 0.3828071  | 5.50E-38 | 4.00E-35 | Mesenchymal progenitors-3 |
| Rpl41    | 12.6763315 | 0.43125272 | 8.00E-37 | 5.42E-34 | Mesenchymal progenitors-3 |
| Tagln    | 12.560654  | 1.4210595  | 3.47E-36 | 2.28E-33 | Mesenchymal progenitors-3 |
| Hmgb2    | 12.399411  | 1.2634095  | 2.63E-35 | 1.67E-32 | Mesenchymal progenitors-3 |
| Acta2    | 12.383945  | 1.367347   | 3.19E-35 | 1.96E-32 | Mesenchymal progenitors-3 |
| Top2a    | 12.318841  | 2.061647   | 7.17E-35 | 4.27E-32 | Mesenchymal progenitors-3 |
| Ndufa4l2 | 12.209259  | 1.9008229  | 2.77E-34 | 1.60E-31 | Mesenchymal progenitors-3 |
| Tyms     | 12.132065  | 1.5985794  | 7.14E-34 | 4.01E-31 | Mesenchymal progenitors-3 |
| Tmsb10   | 12.001671  | 0.5884809  | 3.48E-33 | 1.85E-30 | Mesenchymal progenitors-3 |
| Spc24    | 11.981578  | 1.7588466  | 4.44E-33 | 2.30E-30 | Mesenchymal progenitors-3 |
| Cdk1     | 11.927413  | 1.5894871  | 8.52E-33 | 4.18E-30 | Mesenchymal progenitors-3 |
| Snrpd1   | 11.914461  | 0.7643332  | 9.95E-33 | 4.77E-30 | Mesenchymal progenitors-3 |
| Tubb4b   | 11.905338  | 1.1817101  | 1.11E-32 | 5.19E-30 | Mesenchymal progenitors-3 |
| Tuba1a   | 11.768622  | 0.9503621  | 5.66E-32 | 2.59E-29 | Mesenchymal progenitors-3 |
| Mfge8    | 11.720615  | 1.2883848  | 9.99E-32 | 4.46E-29 | Mesenchymal progenitors-3 |
| Mif      | 11.690772  | 0.7933306  | 1.42E-31 | 6.21E-29 | Mesenchymal progenitors-3 |
| Tuba1b   | 11.681423  | 1.0062397  | 1.59E-31 | 6.78E-29 | Mesenchymal progenitors-3 |

|          |            |            |           |           |                                  |
|----------|------------|------------|-----------|-----------|----------------------------------|
| Rnaseh2c | 11.601612  | 1.0857564  | 4.04E-31  | 1.66E-28  | Mesenchymal progenitors-3        |
| Dut      | 11.525445  | 1.0873984  | 9.82E-31  | 3.94E-28  | Mesenchymal progenitors-3        |
| Hist1h1b | 11.519483  | 2.4869208  | 1.05E-30  | 4.06E-28  | Mesenchymal progenitors-3        |
| Cd63     | 11.507465  | 0.64808613 | 1.21E-30  | 4.57E-28  | Mesenchymal progenitors-3        |
| Nasp     | 11.484375  | 0.99702394 | 1.58E-30  | 5.86E-28  | Mesenchymal progenitors-3        |
| Zeb2     | 11.465051  | 1.060508   | 1.98E-30  | 7.19E-28  | Mesenchymal progenitors-3        |
| Hspa8    | 11.452798  | 0.52371716 | 2.28E-30  | 8.14E-28  | Mesenchymal progenitors-3        |
| Prdx4    | 11.414949  | 0.9025896  | 3.52E-30  | 1.24E-27  | Mesenchymal progenitors-3        |
| Selenoh  | 11.1753645 | 0.9282549  | 5.38E-29  | 1.86E-26  | Mesenchymal progenitors-3        |
| Pdgfrb   | 11.140287  | 1.1069546  | 7.99E-29  | 2.69E-26  | Mesenchymal progenitors-3        |
| Atad2    | 11.139148  | 1.4712259  | 8.09E-29  | 2.69E-26  | Mesenchymal progenitors-3        |
| Itga1    | 11.1181    | 1.8830605  | 1.02E-28  | 3.35E-26  | Mesenchymal progenitors-3        |
| Mab21l2  | 33.330154  | 2.3240654  | 1.41E-243 | 2.78E-240 | Gut wall mesenchymal progenitors |
| Meis2    | 32.752075  | 1.5972643  | 2.84E-235 | 5.07E-232 | Gut wall mesenchymal progenitors |
| Foxp2    | 29.323433  | 2.4806557  | 5.21E-189 | 6.83E-186 | Gut wall mesenchymal progenitors |
| Rps14    | 28.90197   | 0.8387376  | 1.13E-183 | 1.39E-180 | Gut wall mesenchymal progenitors |
| Mpped2   | 27.495504  | 2.4582653  | 1.99E-166 | 2.30E-163 | Gut wall mesenchymal progenitors |
| Rps16    | 27.16772   | 0.6598157  | 1.56E-162 | 1.71E-159 | Gut wall mesenchymal progenitors |
| Foxp1    | 26.102072  | 1.7862933  | 3.45E-150 | 2.95E-147 | Gut wall mesenchymal progenitors |
| Col23a1  | 24.62663   | 2.4244103  | 6.55E-134 | 4.29E-131 | Gut wall mesenchymal progenitors |
| Tgfb1    | 24.39047   | 1.9835577  | 2.16E-131 | 1.37E-128 | Gut wall mesenchymal progenitors |
| Ldhd     | 24.159233  | 1.6388464  | 5.97E-129 | 3.35E-126 | Gut wall mesenchymal progenitors |
| Rpl18a   | 23.639986  | 0.6296829  | 1.50E-123 | 7.95E-121 | Gut wall mesenchymal progenitors |
| Npm1     | 23.598022  | 0.7372546  | 4.04E-123 | 2.09E-120 | Gut wall mesenchymal progenitors |
| Rgs10    | 22.793818  | 2.0858512  | 5.28E-115 | 2.41E-112 | Gut wall mesenchymal progenitors |
| Rps19    | 22.776077  | 0.55848384 | 7.92E-115 | 3.54E-112 | Gut wall mesenchymal progenitors |
| Rpl15    | 22.64336   | 0.6277398  | 1.62E-113 | 6.78E-111 | Gut wall mesenchymal progenitors |
| Foxf1    | 22.61781   | 1.906878   | 2.89E-113 | 1.19E-110 | Gut wall mesenchymal progenitors |
| Sub1     | 22.370314  | 0.8438424  | 7.66E-111 | 3.01E-108 | Gut wall mesenchymal progenitors |
| Hsp90ab1 | 22.146479  | 0.66970646 | 1.13E-108 | 4.18E-106 | Gut wall mesenchymal progenitors |
| Rps23    | 22.02176   | 0.58822364 | 1.78E-107 | 6.25E-105 | Gut wall mesenchymal progenitors |
| Atp5g2   | 21.947935  | 0.92239374 | 9.06E-107 | 3.12E-104 | Gut wall mesenchymal progenitors |
| Rpl5     | 21.910261  | 0.5928985  | 2.07E-106 | 6.91E-104 | Gut wall mesenchymal progenitors |
| Tpt1     | 21.640617  | 0.35949427 | 7.45E-104 | 2.40E-101 | Gut wall mesenchymal progenitors |
| Cox7a2l  | 21.608438  | 0.9552674  | 1.50E-103 | 4.74E-101 | Gut wall mesenchymal progenitors |
| Rps13    | 21.191492  | 0.50249386 | 1.14E-99  | 3.51E-97  | Gut wall mesenchymal progenitors |
| Tcf21    | 21.08024   | 1.3328248  | 1.21E-98  | 3.65E-96  | Gut wall mesenchymal progenitors |
| Rps27a   | 20.983974  | 0.433137   | 9.19E-98  | 2.74E-95  | Gut wall mesenchymal progenitors |
| Rpl30    | 20.598389  | 0.45330924 | 2.84E-94  | 7.97E-92  | Gut wall mesenchymal progenitors |
| Etv1     | 20.546724  | 2.3169777  | 8.23E-94  | 2.28E-91  | Gut wall mesenchymal progenitors |
| Nnat     | 20.430973  | 1.5137366  | 8.87E-93  | 2.39E-90  | Gut wall mesenchymal progenitors |
| Cox4i1   | 20.221975  | 0.62443626 | 6.27E-91  | 1.64E-88  | Gut wall mesenchymal progenitors |
| Rpl23    | 19.67536   | 0.39007637 | 3.51E-86  | 8.72E-84  | Gut wall mesenchymal progenitors |
| Rps5     | 19.563734  | 0.6646863  | 3.15E-85  | 7.55E-83  | Gut wall mesenchymal progenitors |
| Rpl17    | 19.51226   | 0.50629544 | 8.64E-85  | 2.05E-82  | Gut wall mesenchymal progenitors |
| Lsp1     | 19.419302  | 1.2702795  | 5.30E-84  | 1.23E-81  | Gut wall mesenchymal progenitors |
| Atxn7l3b | 19.396885  | 0.8369448  | 8.20E-84  | 1.87E-81  | Gut wall mesenchymal progenitors |



|          |           |            |           |           |                                  |
|----------|-----------|------------|-----------|-----------|----------------------------------|
| Rps24    | 19.337269 | 0.34140328 | 2.61E-83  | 5.76E-81  | Gut wall mesenchymal progenitors |
| Rpl18    | 19.13799  | 0.5792315  | 1.22E-81  | 2.58E-79  | Gut wall mesenchymal progenitors |
| Rps7     | 19.11829  | 0.5382085  | 1.78E-81  | 3.72E-79  | Gut wall mesenchymal progenitors |
| Rnd3     | 19.081095 | 1.4400035  | 3.63E-81  | 7.50E-79  | Gut wall mesenchymal progenitors |
| Tceal9   | 18.987627 | 0.69197726 | 2.16E-80  | 4.42E-78  | Gut wall mesenchymal progenitors |
| Tshz2    | 18.849098 | 0.82720375 | 2.99E-79  | 5.82E-77  | Gut wall mesenchymal progenitors |
| Btg1     | 18.613476 | 1.2073365  | 2.50E-77  | 4.77E-75  | Gut wall mesenchymal progenitors |
| Smoc2    | 18.586365 | 1.1692034  | 4.14E-77  | 7.83E-75  | Gut wall mesenchymal progenitors |
| Rpl34    | 18.573303 | 0.5825076  | 5.28E-77  | 9.89E-75  | Gut wall mesenchymal progenitors |
| Rps4x    | 18.568588 | 0.4489223  | 5.77E-77  | 1.07E-74  | Gut wall mesenchymal progenitors |
| Fgfr2    | 18.003754 | 2.6498208  | 1.82E-72  | 3.19E-70  | Gut wall mesenchymal progenitors |
| Kit      | 17.917227 | 2.339064   | 8.65E-72  | 1.49E-69  | Gut wall mesenchymal progenitors |
| Rpl7     | 17.811392 | 0.4082594  | 5.77E-71  | 9.85E-69  | Gut wall mesenchymal progenitors |
| Gm266    | 17.791574 | 1.4630076  | 8.21E-71  | 1.39E-68  | Gut wall mesenchymal progenitors |
| Iqgap2   | 17.757391 | 2.0305507  | 1.51E-70  | 2.54E-68  | Gut wall mesenchymal progenitors |
| Myl6     | 29.365566 | 1.7925792  | 1.51E-189 | 2.97E-185 | SM-1 (Gut wall)                  |
| Mylk     | 28.951904 | 3.700022   | 2.66E-184 | 2.61E-180 | SM-1 (Gut wall)                  |
| Acta2    | 28.823053 | 4.0383463  | 1.10E-182 | 7.23E-179 | SM-1 (Gut wall)                  |
| Myl9     | 27.981304 | 2.917007   | 2.74E-172 | 1.35E-168 | SM-1 (Gut wall)                  |
| Tpm1     | 26.200666 | 2.0111089  | 2.61E-151 | 1.03E-147 | SM-1 (Gut wall)                  |
| Tagln    | 25.174133 | 3.2636192  | 7.69E-140 | 2.52E-136 | SM-1 (Gut wall)                  |
| Tpm2     | 23.630833 | 2.0106785  | 1.86E-123 | 5.22E-120 | SM-1 (Gut wall)                  |
| Cnn2     | 23.592638 | 2.0617948  | 4.59E-123 | 1.13E-119 | SM-1 (Gut wall)                  |
| Psd      | 22.819832 | 2.3352578  | 2.91E-115 | 6.36E-112 | SM-1 (Gut wall)                  |
| Myh11    | 22.26487  | 3.5030818  | 8.10E-110 | 1.59E-106 | SM-1 (Gut wall)                  |
| Id2      | 21.868464 | 2.177464   | 5.19E-106 | 9.27E-103 | SM-1 (Gut wall)                  |
| Alcam    | 20.636417 | 2.260035   | 1.29E-94  | 1.95E-91  | SM-1 (Gut wall)                  |
| Ckb      | 20.217667 | 2.508817   | 6.84E-91  | 9.61E-88  | SM-1 (Gut wall)                  |
| Foxp2    | 19.549559 | 2.3421092  | 4.16E-85  | 5.45E-82  | SM-1 (Gut wall)                  |
| Actg2    | 19.504871 | 2.6528316  | 9.98E-85  | 1.23E-81  | SM-1 (Gut wall)                  |
| Cnn1     | 19.48547  | 3.3776443  | 1.46E-84  | 1.69E-81  | SM-1 (Gut wall)                  |
| Lsp1     | 19.007517 | 1.8311113  | 1.48E-80  | 1.61E-77  | SM-1 (Gut wall)                  |
| Pde5a    | 18.608177 | 2.377091   | 2.76E-77  | 2.71E-74  | SM-1 (Gut wall)                  |
| Dstn     | 18.525509 | 1.5457859  | 1.29E-76  | 1.20E-73  | SM-1 (Gut wall)                  |
| Csrp1    | 17.613907 | 2.04056    | 1.93E-69  | 1.46E-66  | SM-1 (Gut wall)                  |
| Meis2    | 16.816757 | 1.2358439  | 1.84E-63  | 1.34E-60  | SM-1 (Gut wall)                  |
| Foxp1    | 16.488764 | 1.6624762  | 4.42E-61  | 3.10E-58  | SM-1 (Gut wall)                  |
| Actg1    | 15.965099 | 0.73953605 | 2.24E-57  | 1.42E-54  | SM-1 (Gut wall)                  |
| Actb     | 15.9387   | 0.6823814  | 3.41E-57  | 2.10E-54  | SM-1 (Gut wall)                  |
| Tgfb1i1  | 15.850874 | 1.4370635  | 1.39E-56  | 8.01E-54  | SM-1 (Gut wall)                  |
| Mab21l2  | 15.812432 | 1.6525301  | 2.55E-56  | 1.43E-53  | SM-1 (Gut wall)                  |
| Mpped2   | 15.549988 | 2.037179   | 1.59E-54  | 8.69E-52  | SM-1 (Gut wall)                  |
| Lmod1    | 15.395253 | 3.059047   | 1.76E-53  | 9.36E-51  | SM-1 (Gut wall)                  |
| Cdc42ep3 | 15.05187  | 2.399394   | 3.36E-51  | 1.65E-48  | SM-1 (Gut wall)                  |
| Rbpms    | 14.996408 | 1.3706721  | 7.75E-51  | 3.71E-48  | SM-1 (Gut wall)                  |
| Bend5    | 14.950721 | 2.480825   | 1.54E-50  | 7.21E-48  | SM-1 (Gut wall)                  |
| Flna     | 14.930747 | 1.3077612  | 2.08E-50  | 9.50E-48  | SM-1 (Gut wall)                  |

|          |            |            |           |           |                 |
|----------|------------|------------|-----------|-----------|-----------------|
| Pfn1     | 14.736863  | 0.81632525 | 3.74E-49  | 1.67E-46  | SM-1 (Gut wall) |
| Map1b    | 14.450501  | 1.5099825  | 2.49E-47  | 1.04E-44  | SM-1 (Gut wall) |
| Myocd    | 14.396389  | 2.877125   | 5.45E-47  | 2.19E-44  | SM-1 (Gut wall) |
| Cox8a    | 14.130979  | 0.75173545 | 2.45E-45  | 9.43E-43  | SM-1 (Gut wall) |
| Smoc2    | 14.043636  | 1.3060979  | 8.43E-45  | 3.18E-42  | SM-1 (Gut wall) |
| Nexn     | 13.847269  | 2.1441479  | 1.32E-43  | 4.90E-41  | SM-1 (Gut wall) |
| Cox4i1   | 13.776282  | 0.63335353 | 3.54E-43  | 1.27E-40  | SM-1 (Gut wall) |
| Fermt2   | 13.587285  | 1.2274176  | 4.76E-42  | 1.67E-39  | SM-1 (Gut wall) |
| Ppp1r12b | 13.545967  | 1.835356   | 8.37E-42  | 2.89E-39  | SM-1 (Gut wall) |
| Synpo2   | 13.460748  | 2.447975   | 2.66E-41  | 9.02E-39  | SM-1 (Gut wall) |
| Rgmb     | 13.27612   | 2.2656412  | 3.18E-40  | 1.03E-37  | SM-1 (Gut wall) |
| Uqcrh    | 13.1166115 | 0.6260795  | 2.65E-39  | 8.25E-37  | SM-1 (Gut wall) |
| Id1      | 12.956664  | 1.5953032  | 2.15E-38  | 6.61E-36  | SM-1 (Gut wall) |
| Pdlim7   | 12.528747  | 1.1888081  | 5.20E-36  | 1.50E-33  | SM-1 (Gut wall) |
| Ccdc107  | 12.409522  | 1.6082335  | 2.32E-35  | 6.51E-33  | SM-1 (Gut wall) |
| Tmsb4x   | 12.106928  | 0.48516512 | 9.71E-34  | 2.69E-31  | SM-1 (Gut wall) |
| Abrac1   | 12.052793  | 1.0890341  | 1.87E-33  | 5.12E-31  | SM-1 (Gut wall) |
| Ppia     | 12.04175   | 0.4934402  | 2.14E-33  | 5.77E-31  | SM-1 (Gut wall) |
| Actg2    | 32.368217  | 5.4703603  | 7.69E-230 | 1.51E-225 | SM-2 (Gut wall) |
| Acta2    | 31.732866  | 4.8293247  | 5.47E-221 | 5.38E-217 | SM-2 (Gut wall) |
| Mylk     | 30.234638  | 4.2434764  | 8.31E-201 | 5.44E-197 | SM-2 (Gut wall) |
| Myl6     | 28.669262  | 1.8817941  | 9.22E-181 | 3.63E-177 | SM-2 (Gut wall) |
| Myl9     | 28.09378   | 3.233155   | 1.17E-173 | 3.82E-170 | SM-2 (Gut wall) |
| Dstn     | 27.657328  | 2.540293   | 2.28E-168 | 6.40E-165 | SM-2 (Gut wall) |
| Cnn1     | 27.523314  | 4.8816113  | 9.24E-167 | 2.27E-163 | SM-2 (Gut wall) |
| Myh11    | 27.447113  | 4.651604   | 7.52E-166 | 1.64E-162 | SM-2 (Gut wall) |
| Ckb      | 27.314167  | 3.579085   | 2.88E-164 | 5.66E-161 | SM-2 (Gut wall) |
| Cald1    | 26.727957  | 2.0083055  | 2.23E-157 | 3.98E-154 | SM-2 (Gut wall) |
| Tpm1     | 26.339376  | 2.1395364  | 6.79E-153 | 1.11E-149 | SM-2 (Gut wall) |
| Hmga2    | 25.713661  | 3.4595747  | 8.22E-146 | 1.15E-142 | SM-2 (Gut wall) |
| Foxf1    | 25.428349  | 2.9918125  | 1.23E-142 | 1.61E-139 | SM-2 (Gut wall) |
| Tagln    | 24.614618  | 3.499669   | 8.81E-134 | 9.62E-131 | SM-2 (Gut wall) |
| Igfbp2   | 24.515003  | 3.3141804  | 1.02E-132 | 1.06E-129 | SM-2 (Gut wall) |
| Tpm2     | 24.440805  | 2.3683035  | 6.30E-132 | 6.19E-129 | SM-2 (Gut wall) |
| Actb     | 23.624207  | 1.0078144  | 2.17E-123 | 1.86E-120 | SM-2 (Gut wall) |
| Mgst3    | 23.006216  | 2.897808   | 4.04E-117 | 2.94E-114 | SM-2 (Gut wall) |
| Abrac1   | 22.667263  | 2.0124457  | 9.43E-114 | 6.62E-111 | SM-2 (Gut wall) |
| Cfl1     | 22.535948  | 1.144291   | 1.84E-112 | 1.21E-109 | SM-2 (Gut wall) |
| Fermt2   | 22.343649  | 1.9949713  | 1.39E-110 | 8.82E-108 | SM-2 (Gut wall) |
| Pdlim7   | 22.088036  | 2.1052816  | 4.12E-108 | 2.53E-105 | SM-2 (Gut wall) |
| Rbpms    | 21.693575  | 1.9420911  | 2.36E-104 | 1.40E-101 | SM-2 (Gut wall) |
| Flna     | 21.068363  | 1.7491508  | 1.55E-98  | 8.71E-96  | SM-2 (Gut wall) |
| Cnn2     | 20.993334  | 1.8287827  | 7.55E-98  | 4.01E-95  | SM-2 (Gut wall) |
| Psd      | 20.916435  | 2.0914907  | 3.79E-97  | 1.91E-94  | SM-2 (Gut wall) |
| Synpo2   | 20.522549  | 3.238311   | 1.35E-93  | 6.65E-91  | SM-2 (Gut wall) |
| Myocd    | 20.457087  | 3.6844559  | 5.20E-93  | 2.49E-90  | SM-2 (Gut wall) |
| Mab21l2  | 20.121744  | 2.0438914  | 4.76E-90  | 2.18E-87  | SM-2 (Gut wall) |

|          |           |            |           |           |                                   |
|----------|-----------|------------|-----------|-----------|-----------------------------------|
| Ncam1    | 19.555471 | 1.8695769  | 3.71E-85  | 1.62E-82  | SM-2 (Gut wall)                   |
| Fbxl22   | 19.448042 | 4.6152735  | 3.03E-84  | 1.27E-81  | SM-2 (Gut wall)                   |
| Rpl7     | 19.306967 | 0.6592516  | 4.69E-83  | 1.92E-80  | SM-2 (Gut wall)                   |
| Ccnd2    | 19.228235 | 1.655463   | 2.15E-82  | 8.44E-80  | SM-2 (Gut wall)                   |
| Aldh1a1  | 19.00672  | 3.1492658  | 1.50E-80  | 5.67E-78  | SM-2 (Gut wall)                   |
| Nexn     | 18.823496 | 2.7524896  | 4.85E-79  | 1.73E-76  | SM-2 (Gut wall)                   |
| Hacd1    | 18.781618 | 2.5175133  | 1.07E-78  | 3.75E-76  | SM-2 (Gut wall)                   |
| Csrp1    | 18.160748 | 2.095492   | 1.06E-73  | 3.52E-71  | SM-2 (Gut wall)                   |
| Pdlim3   | 18.151606 | 4.2232003  | 1.25E-73  | 4.08E-71  | SM-2 (Gut wall)                   |
| Pfn1     | 17.99265  | 0.95018035 | 2.22E-72  | 7.17E-70  | SM-2 (Gut wall)                   |
| Aldh1a2  | 17.966671 | 3.8221672  | 3.55E-72  | 1.13E-69  | SM-2 (Gut wall)                   |
| Lpp      | 17.91691  | 1.8304708  | 8.70E-72  | 2.67E-69  | SM-2 (Gut wall)                   |
| Foxp1    | 17.399197 | 1.695838   | 8.37E-68  | 2.42E-65  | SM-2 (Gut wall)                   |
| Cavin2   | 17.110971 | 2.1026309  | 1.23E-65  | 3.40E-63  | SM-2 (Gut wall)                   |
| Mgll     | 17.040113 | 2.9764671  | 4.14E-65  | 1.13E-62  | SM-2 (Gut wall)                   |
| Carmn    | 17.0214   | 2.204779   | 5.70E-65  | 1.53E-62  | SM-2 (Gut wall)                   |
| Ppia     | 17.014069 | 0.627659   | 6.46E-65  | 1.72E-62  | SM-2 (Gut wall)                   |
| Nrp2     | 17.006601 | 1.9985754  | 7.34E-65  | 1.92E-62  | SM-2 (Gut wall)                   |
| Ccdc107  | 16.806856 | 2.066406   | 2.17E-63  | 5.55E-61  | SM-2 (Gut wall)                   |
| Slc25a3  | 16.678028 | 0.9839158  | 1.89E-62  | 4.71E-60  | SM-2 (Gut wall)                   |
| Tgfb1i1  | 16.520905 | 1.4702163  | 2.59E-61  | 6.30E-59  | SM-2 (Gut wall)                   |
| Etv1     | 25.943613 | 5.0950403  | 2.15E-148 | 4.22E-144 | Interstitial cells of Cajal (ICC) |
| Kit      | 24.41064  | 4.9320855  | 1.32E-131 | 1.30E-127 | Interstitial cells of Cajal (ICC) |
| Chchd10  | 23.020771 | 5.7466364  | 2.89E-117 | 1.89E-113 | Interstitial cells of Cajal (ICC) |
| Foxf1    | 22.60268  | 3.3619392  | 4.08E-113 | 2.00E-109 | Interstitial cells of Cajal (ICC) |
| Nrp2     | 22.123743 | 3.3182485  | 1.87E-108 | 7.34E-105 | Interstitial cells of Cajal (ICC) |
| Ap1s2    | 20.801422 | 3.4855437  | 4.20E-96  | 6.35E-93  | Interstitial cells of Cajal (ICC) |
| Enpep    | 20.465628 | 5.2724814  | 4.36E-93  | 4.51E-90  | Interstitial cells of Cajal (ICC) |
| mt-Cytb  | 19.903658 | 0.8565883  | 3.78E-88  | 3.23E-85  | Interstitial cells of Cajal (ICC) |
| Cpe      | 19.565535 | 2.0356038  | 3.04E-85  | 2.39E-82  | Interstitial cells of Cajal (ICC) |
| mt-Nd4   | 19.504019 | 0.8134009  | 1.01E-84  | 7.12E-82  | Interstitial cells of Cajal (ICC) |
| Pcdh17   | 19.472065 | 4.7613006  | 1.89E-84  | 1.24E-81  | Interstitial cells of Cajal (ICC) |
| Tmem158  | 19.042852 | 3.2533882  | 7.53E-81  | 4.48E-78  | Interstitial cells of Cajal (ICC) |
| Rgs10    | 18.681164 | 2.845442   | 7.05E-78  | 3.64E-75  | Interstitial cells of Cajal (ICC) |
| Cox8a    | 18.419783 | 1.1914186  | 9.12E-76  | 4.37E-73  | Interstitial cells of Cajal (ICC) |
| Btg1     | 18.383265 | 2.0980535  | 1.79E-75  | 8.17E-73  | Interstitial cells of Cajal (ICC) |
| Foxp2    | 18.310055 | 2.6231787  | 6.88E-75  | 2.94E-72  | Interstitial cells of Cajal (ICC) |
| Ppargc1a | 18.302588 | 4.5644584  | 7.89E-75  | 3.30E-72  | Interstitial cells of Cajal (ICC) |
| mt-Nd2   | 17.85487  | 0.76456505 | 2.65E-71  | 1.00E-68  | Interstitial cells of Cajal (ICC) |
| Spry1    | 17.818432 | 3.1218667  | 5.08E-71  | 1.89E-68  | Interstitial cells of Cajal (ICC) |
| Edn3     | 17.796125 | 3.5221226  | 7.57E-71  | 2.76E-68  | Interstitial cells of Cajal (ICC) |
| Atp2b1   | 17.666378 | 1.7861906  | 7.61E-70  | 2.61E-67  | Interstitial cells of Cajal (ICC) |
| Thbs4    | 17.665722 | 3.7923837  | 7.70E-70  | 2.61E-67  | Interstitial cells of Cajal (ICC) |
| Ldhb     | 17.621752 | 2.225136   | 1.68E-69  | 5.49E-67  | Interstitial cells of Cajal (ICC) |
| Elov6    | 17.432724 | 2.8543735  | 4.66E-68  | 1.48E-65  | Interstitial cells of Cajal (ICC) |
| mt-Nd1   | 17.190653 | 0.7767325  | 3.12E-66  | 9.29E-64  | Interstitial cells of Cajal (ICC) |
| Atp2a3   | 17.161842 | 4.30058    | 5.13E-66  | 1.50E-63  | Interstitial cells of Cajal (ICC) |

|               |           |            |          |          |                                   |
|---------------|-----------|------------|----------|----------|-----------------------------------|
| Pde3a         | 16.90477  | 2.6734402  | 4.15E-64 | 1.20E-61 | Interstitial cells of Cajal (ICC) |
| Dkk2          | 16.798588 | 2.9416158  | 2.50E-63 | 6.92E-61 | Interstitial cells of Cajal (ICC) |
| mt-Co3        | 16.76088  | 0.56051064 | 4.72E-63 | 1.29E-60 | Interstitial cells of Cajal (ICC) |
| Ano1          | 16.647177 | 3.7945626  | 3.17E-62 | 8.54E-60 | Interstitial cells of Cajal (ICC) |
| Itpk1         | 16.411863 | 3.7845078  | 1.57E-60 | 4.07E-58 | Interstitial cells of Cajal (ICC) |
| Foxp1         | 16.278208 | 1.9633447  | 1.41E-59 | 3.53E-57 | Interstitial cells of Cajal (ICC) |
| Osr1          | 16.06725  | 1.8147062  | 4.33E-58 | 1.04E-55 | Interstitial cells of Cajal (ICC) |
| Atp5b         | 15.994735 | 1.159727   | 1.39E-57 | 3.29E-55 | Interstitial cells of Cajal (ICC) |
| Slc12a2       | 15.848769 | 2.6828299  | 1.43E-56 | 3.28E-54 | Interstitial cells of Cajal (ICC) |
| Atp1a1        | 15.426984 | 2.1654     | 1.08E-53 | 2.30E-51 | Interstitial cells of Cajal (ICC) |
| Ppp1r14a      | 15.230865 | 2.3440852  | 2.21E-52 | 4.61E-50 | Interstitial cells of Cajal (ICC) |
| Aldoa         | 15.098896 | 1.5368929  | 1.65E-51 | 3.24E-49 | Interstitial cells of Cajal (ICC) |
| Prkcq         | 14.882437 | 5.6278887  | 4.29E-50 | 8.26E-48 | Interstitial cells of Cajal (ICC) |
| mt-Co2        | 14.605012 | 0.50883216 | 2.61E-48 | 4.84E-46 | Interstitial cells of Cajal (ICC) |
| C2cd4a        | 14.532364 | 5.492038   | 7.56E-48 | 1.36E-45 | Interstitial cells of Cajal (ICC) |
| Timp3         | 14.460291 | 2.2214167  | 2.16E-47 | 3.86E-45 | Interstitial cells of Cajal (ICC) |
| Rbpms         | 14.385435 | 1.559861   | 6.39E-47 | 1.11E-44 | Interstitial cells of Cajal (ICC) |
| H19           | 14.036057 | 1.0206126  | 9.38E-45 | 1.54E-42 | Interstitial cells of Cajal (ICC) |
| Uqcr10        | 14.011864 | 1.313422   | 1.32E-44 | 2.14E-42 | Interstitial cells of Cajal (ICC) |
| Atp1b3        | 13.996274 | 2.1374762  | 1.64E-44 | 2.65E-42 | Interstitial cells of Cajal (ICC) |
| Atp2a2        | 13.893143 | 1.9307842  | 6.97E-44 | 1.08E-41 | Interstitial cells of Cajal (ICC) |
| Aldh1b1       | 13.704129 | 3.4368577  | 9.59E-43 | 1.44E-40 | Interstitial cells of Cajal (ICC) |
| Slc38a1       | 13.647338 | 2.5747325  | 2.09E-42 | 3.12E-40 | Interstitial cells of Cajal (ICC) |
| 2010107E04Rik | 13.43607  | 1.2406986  | 3.72E-41 | 5.37E-39 | Interstitial cells of Cajal (ICC) |
| Dcn           | 58.4214   | 4.4921694  | 0        | 0        | Pdgfra+ fibroblast-like cells     |
| Postn         | 57.662373 | 5.0452905  | 0        | 0        | Pdgfra+ fibroblast-like cells     |
| Col3a1        | 57.481396 | 2.7412927  | 0        | 0        | Pdgfra+ fibroblast-like cells     |
| Gsn           | 56.237007 | 3.322065   | 0        | 0        | Pdgfra+ fibroblast-like cells     |
| Col1a2        | 56.024487 | 3.246254   | 0        | 0        | Pdgfra+ fibroblast-like cells     |
| Col1a1        | 55.797672 | 2.754864   | 0        | 0        | Pdgfra+ fibroblast-like cells     |
| S100a6        | 53.34749  | 3.997101   | 0        | 0        | Pdgfra+ fibroblast-like cells     |
| Col6a1        | 52.901024 | 2.4502263  | 0        | 0        | Pdgfra+ fibroblast-like cells     |
| Lum           | 51.081955 | 3.0453007  | 0        | 0        | Pdgfra+ fibroblast-like cells     |
| Mfap5         | 50.882915 | 6.067314   | 0        | 0        | Pdgfra+ fibroblast-like cells     |
| Col14a1       | 49.866238 | 4.042242   | 0        | 0        | Pdgfra+ fibroblast-like cells     |
| Itih5         | 49.743477 | 5.1414413  | 0        | 0        | Pdgfra+ fibroblast-like cells     |
| Col6a2        | 49.549107 | 2.517978   | 0        | 0        | Pdgfra+ fibroblast-like cells     |
| Sparc         | 48.768295 | 1.8460482  | 0        | 0        | Pdgfra+ fibroblast-like cells     |
| S100a10       | 48.59025  | 3.0719876  | 0        | 0        | Pdgfra+ fibroblast-like cells     |
| Itm2a         | 47.888084 | 2.2380567  | 0        | 0        | Pdgfra+ fibroblast-like cells     |
| Gpc3          | 47.637432 | 1.9877486  | 0        | 0        | Pdgfra+ fibroblast-like cells     |
| Cd34          | 44.728333 | 4.403257   | 0        | 0        | Pdgfra+ fibroblast-like cells     |
| Col5a1        | 44.62751  | 2.2283921  | 0        | 0        | Pdgfra+ fibroblast-like cells     |
| Dlk1          | 43.98017  | 1.8000433  | 0        | 0        | Pdgfra+ fibroblast-like cells     |
| Clec3b        | 43.348377 | 9.025129   | 0        | 0        | Pdgfra+ fibroblast-like cells     |
| Vim           | 42.85277  | 1.3433007  | 0        | 0        | Pdgfra+ fibroblast-like cells     |
| Col6a3        | 42.772522 | 2.2620316  | 0        | 0        | Pdgfra+ fibroblast-like cells     |

|         |           |           |           |           |                                        |
|---------|-----------|-----------|-----------|-----------|----------------------------------------|
| Nid1    | 42.63602  | 2.6310709 | 0         | 0         | Pdgfra+ fibroblast-like cells          |
| Ebf1    | 41.128963 | 3.1147728 | 0         | 0         | Pdgfra+ fibroblast-like cells          |
| Fstl1   | 41.12784  | 1.5886719 | 0         | 0         | Pdgfra+ fibroblast-like cells          |
| Col5a2  | 40.913696 | 1.6960328 | 0         | 0         | Pdgfra+ fibroblast-like cells          |
| Igfbp7  | 40.506027 | 3.1548657 | 0         | 0         | Pdgfra+ fibroblast-like cells          |
| Zim1    | 40.038944 | 3.235103  | 0         | 0         | Pdgfra+ fibroblast-like cells          |
| Vcan    | 39.814625 | 2.5752034 | 0         | 0         | Pdgfra+ fibroblast-like cells          |
| Serp1   | 39.098633 | 2.982793  | 0         | 0         | Pdgfra+ fibroblast-like cells          |
| Igfbp4  | 39.05853  | 1.4080992 | 0         | 0         | Pdgfra+ fibroblast-like cells          |
| Fbln1   | 39.022877 | 2.3417127 | 0         | 0         | Pdgfra+ fibroblast-like cells          |
| Akap12  | 38.73043  | 2.1283462 | 0         | 0         | Pdgfra+ fibroblast-like cells          |
| Tnxb    | 38.64362  | 4.1143627 | 0         | 0         | Pdgfra+ fibroblast-like cells          |
| Ahnak   | 38.57577  | 1.9836315 | 0         | 0         | Pdgfra+ fibroblast-like cells          |
| Col5a3  | 38.45757  | 4.848876  | 0         | 0         | Pdgfra+ fibroblast-like cells          |
| Pcolce  | 38.356598 | 2.8340878 | 0         | 0         | Pdgfra+ fibroblast-like cells          |
| Sparcl1 | 37.40638  | 1.8692746 | 3.08E-306 | 1.23E-303 | Pdgfra+ fibroblast-like cells          |
| Matn2   | 36.999092 | 3.2932703 | 1.18E-299 | 4.48E-297 | Pdgfra+ fibroblast-like cells          |
| Ltbp4   | 36.150963 | 1.9566725 | 3.59E-286 | 1.24E-283 | Pdgfra+ fibroblast-like cells          |
| Bgn     | 35.812428 | 1.8907233 | 7.08E-281 | 2.32E-278 | Pdgfra+ fibroblast-like cells          |
| Crip1   | 35.10319  | 3.0133147 | 6.03E-270 | 1.79E-267 | Pdgfra+ fibroblast-like cells          |
| Fndc1   | 34.937813 | 5.1029835 | 1.98E-267 | 5.82E-265 | Pdgfra+ fibroblast-like cells          |
| Fbn1    | 34.698925 | 1.7362343 | 8.18E-264 | 2.36E-261 | Pdgfra+ fibroblast-like cells          |
| Fmo1    | 34.60709  | 3.4842885 | 1.98E-262 | 5.55E-260 | Pdgfra+ fibroblast-like cells          |
| Laptm4a | 34.508305 | 1.083589  | 6.02E-261 | 1.67E-258 | Pdgfra+ fibroblast-like cells          |
| Peg3    | 34.320324 | 2.0074563 | 3.91E-258 | 1.07E-255 | Pdgfra+ fibroblast-like cells          |
| Rpl39   | 33.949524 | 0.6536679 | 1.24E-252 | 3.25E-250 | Pdgfra+ fibroblast-like cells          |
| Ogn     | 33.709435 | 2.6838143 | 4.21E-249 | 1.05E-246 | Pdgfra+ fibroblast-like cells          |
| Bgn     | 15.995763 | 2.9893765 | 1.37E-57  | 1.44E-53  | Tnc+ Acta-low myofibroblast-like cells |
| Eln     | 15.991424 | 4.857492  | 1.47E-57  | 1.44E-53  | Tnc+ Acta-low myofibroblast-like cells |
| Thbs2   | 15.830831 | 4.122994  | 1.91E-56  | 1.25E-52  | Tnc+ Acta-low myofibroblast-like cells |
| Mgp     | 15.707175 | 4.123225  | 1.35E-55  | 6.64E-52  | Tnc+ Acta-low myofibroblast-like cells |
| Col1a2  | 15.501913 | 3.0601203 | 3.37E-54  | 1.32E-50  | Tnc+ Acta-low myofibroblast-like cells |
| Col1a1  | 14.483223 | 2.469776  | 1.55E-47  | 5.07E-44  | Tnc+ Acta-low myofibroblast-like cells |
| Fhl1    | 14.159526 | 4.2423396 | 1.63E-45  | 4.58E-42  | Tnc+ Acta-low myofibroblast-like cells |
| Igfbp7  | 14.010166 | 3.5356836 | 1.35E-44  | 3.32E-41  | Tnc+ Acta-low myofibroblast-like cells |
| Col14a1 | 13.934968 | 3.408484  | 3.88E-44  | 8.48E-41  | Tnc+ Acta-low myofibroblast-like cells |
| Col3a1  | 13.763715 | 2.2284214 | 4.21E-43  | 7.53E-40  | Tnc+ Acta-low myofibroblast-like cells |
| Crip1   | 13.37645  | 3.6422386 | 8.30E-41  | 1.25E-37  | Tnc+ Acta-low myofibroblast-like cells |
| Vcan    | 13.324292 | 2.7942693 | 1.67E-40  | 2.19E-37  | Tnc+ Acta-low myofibroblast-like cells |
| Postn   | 13.312839 | 3.5489023 | 1.95E-40  | 2.39E-37  | Tnc+ Acta-low myofibroblast-like cells |
| Col16a1 | 12.812887 | 2.7699258 | 1.39E-37  | 1.09E-34  | Tnc+ Acta-low myofibroblast-like cells |
| Adamts2 | 12.763438 | 3.6108527 | 2.62E-37  | 1.98E-34  | Tnc+ Acta-low myofibroblast-like cells |
| Nid1    | 12.388156 | 2.5296078 | 3.03E-35  | 1.75E-32  | Tnc+ Acta-low myofibroblast-like cells |
| Tnc     | 12.068644 | 4.1860723 | 1.55E-33  | 7.79E-31  | Tnc+ Acta-low myofibroblast-like cells |
| Cdh11   | 12.058776 | 2.0610626 | 1.74E-33  | 8.57E-31  | Tnc+ Acta-low myofibroblast-like cells |
| mt-Co1  | 11.971597 | 0.8587143 | 5.01E-33  | 2.34E-30  | Tnc+ Acta-low myofibroblast-like cells |
| Col5a1  | 11.950187 | 1.9864753 | 6.48E-33  | 2.83E-30  | Tnc+ Acta-low myofibroblast-like cells |

|         |            |            |          |          |                                        |
|---------|------------|------------|----------|----------|----------------------------------------|
| Prss35  | 11.929967  | 4.2074833  | 8.26E-33 | 3.53E-30 | Tnc+ Acta-low myofibroblast-like cells |
| Mfap4   | 11.8951435 | 1.8793751  | 1.25E-32 | 5.24E-30 | Tnc+ Acta-low myofibroblast-like cells |
| Fbn1    | 11.857787  | 1.9432724  | 1.96E-32 | 8.03E-30 | Tnc+ Acta-low myofibroblast-like cells |
| mt-Nd1  | 11.794946  | 0.8888106  | 4.14E-32 | 1.60E-29 | Tnc+ Acta-low myofibroblast-like cells |
| Col4a1  | 11.791092  | 2.2074451  | 4.34E-32 | 1.64E-29 | Tnc+ Acta-low myofibroblast-like cells |
| Matn2   | 11.71455   | 2.912099   | 1.07E-31 | 3.77E-29 | Tnc+ Acta-low myofibroblast-like cells |
| mt-Cytb | 11.705652  | 0.84591615 | 1.19E-31 | 4.11E-29 | Tnc+ Acta-low myofibroblast-like cells |
| Hsp90b1 | 11.686445  | 1.7253615  | 1.50E-31 | 5.07E-29 | Tnc+ Acta-low myofibroblast-like cells |
| Sparc   | 11.655961  | 1.4854481  | 2.14E-31 | 7.01E-29 | Tnc+ Acta-low myofibroblast-like cells |
| Dcn     | 11.625521  | 3.0187216  | 3.06E-31 | 9.85E-29 | Tnc+ Acta-low myofibroblast-like cells |
| mt-Nd4  | 11.431315  | 0.777661   | 2.92E-30 | 8.19E-28 | Tnc+ Acta-low myofibroblast-like cells |
| Fhl2    | 11.389752  | 3.3557909  | 4.70E-30 | 1.28E-27 | Tnc+ Acta-low myofibroblast-like cells |
| Igfbp3  | 11.352109  | 4.0783405  | 7.24E-30 | 1.95E-27 | Tnc+ Acta-low myofibroblast-like cells |
| mt-Atp6 | 11.243146  | 0.71512395 | 2.50E-29 | 6.31E-27 | Tnc+ Acta-low myofibroblast-like cells |
| Col4a2  | 11.061187  | 2.23107    | 1.94E-28 | 4.70E-26 | Tnc+ Acta-low myofibroblast-like cells |
| S100a6  | 10.977774  | 2.5263157  | 4.89E-28 | 1.16E-25 | Tnc+ Acta-low myofibroblast-like cells |
| mt-Co2  | 10.924955  | 0.69815457 | 8.76E-28 | 2.05E-25 | Tnc+ Acta-low myofibroblast-like cells |
| Col6a3  | 10.910924  | 1.8700353  | 1.02E-27 | 2.36E-25 | Tnc+ Acta-low myofibroblast-like cells |
| Nov     | 10.805969  | 4.2848387  | 3.23E-27 | 7.29E-25 | Tnc+ Acta-low myofibroblast-like cells |
| Malat1  | 10.707688  | 1.0095245  | 9.37E-27 | 2.07E-24 | Tnc+ Acta-low myofibroblast-like cells |
| Col6a1  | 10.704979  | 1.6252376  | 9.65E-27 | 2.11E-24 | Tnc+ Acta-low myofibroblast-like cells |
| Ntrk3   | 10.665707  | 3.4437175  | 1.47E-26 | 3.18E-24 | Tnc+ Acta-low myofibroblast-like cells |
| Pls3    | 10.54595   | 2.5575383  | 5.30E-26 | 1.11E-23 | Tnc+ Acta-low myofibroblast-like cells |
| Loxl1   | 10.5300255 | 2.3189363  | 6.28E-26 | 1.29E-23 | Tnc+ Acta-low myofibroblast-like cells |
| Pam     | 10.493087  | 2.7068543  | 9.29E-26 | 1.86E-23 | Tnc+ Acta-low myofibroblast-like cells |
| mt-Co3  | 10.396481  | 0.62230235 | 2.57E-25 | 5.01E-23 | Tnc+ Acta-low myofibroblast-like cells |
| Cst3    | 10.382669  | 1.6805627  | 2.97E-25 | 5.73E-23 | Tnc+ Acta-low myofibroblast-like cells |
| Epha3   | 10.3741455 | 2.9040303  | 3.25E-25 | 6.20E-23 | Tnc+ Acta-low myofibroblast-like cells |
| Lhfp    | 10.356723  | 2.5660331  | 3.90E-25 | 7.37E-23 | Tnc+ Acta-low myofibroblast-like cells |
| mt-Nd2  | 10.308067  | 0.7211153  | 6.48E-25 | 1.21E-22 | Tnc+ Acta-low myofibroblast-like cells |
| Mustn1  | 20.52483   | 6.398448   | 1.29E-93 | 2.54E-89 | SM-3 (Villus)                          |
| Tagln   | 20.431337  | 5.856213   | 8.81E-93 | 8.65E-89 | SM-3 (Villus)                          |
| Mcam    | 20.221539  | 5.86431    | 6.33E-91 | 4.15E-87 | SM-3 (Villus)                          |
| Crip1   | 20.1853    | 5.2411427  | 1.32E-90 | 6.48E-87 | SM-3 (Villus)                          |
| Myl9    | 20.159714  | 4.440641   | 2.21E-90 | 8.69E-87 | SM-3 (Villus)                          |
| Mef2c   | 20.143057  | 4.903547   | 3.10E-90 | 1.01E-86 | SM-3 (Villus)                          |
| Aoc3    | 20.03507   | 5.3929815  | 2.72E-89 | 7.65E-86 | SM-3 (Villus)                          |
| Cav1    | 19.889505  | 5.684899   | 5.02E-88 | 1.23E-84 | SM-3 (Villus)                          |
| Myh11   | 19.773561  | 5.705443   | 5.03E-87 | 1.10E-83 | SM-3 (Villus)                          |
| Cald1   | 19.764402  | 2.770548   | 6.03E-87 | 1.19E-83 | SM-3 (Villus)                          |
| Igfbp7  | 19.673204  | 4.682124   | 3.66E-86 | 6.54E-83 | SM-3 (Villus)                          |
| Tinagl1 | 19.65783   | 6.8869596  | 4.95E-86 | 8.11E-83 | SM-3 (Villus)                          |
| Itga1   | 19.631382  | 5.2637486  | 8.34E-86 | 1.26E-82 | SM-3 (Villus)                          |
| Acta2   | 19.511976  | 5.223098   | 8.69E-85 | 1.22E-81 | SM-3 (Villus)                          |
| Tpm1    | 19.489986  | 2.9697218  | 1.34E-84 | 1.75E-81 | SM-3 (Villus)                          |
| Eln     | 19.460575  | 5.5974407  | 2.37E-84 | 2.91E-81 | SM-3 (Villus)                          |
| Flna    | 19.441757  | 3.113771   | 3.42E-84 | 3.96E-81 | SM-3 (Villus)                          |

|          |           |           |           |           |               |
|----------|-----------|-----------|-----------|-----------|---------------|
| Tm4sf1   | 19.283438 | 5.603838  | 7.40E-83  | 7.65E-80  | SM-3 (Villus) |
| Jag1     | 19.230103 | 4.204888  | 2.07E-82  | 2.04E-79  | SM-3 (Villus) |
| Il13ra1  | 19.1992   | 6.419101  | 3.76E-82  | 3.52E-79  | SM-3 (Villus) |
| Esam     | 19.163095 | 5.9778275 | 7.53E-82  | 6.72E-79  | SM-3 (Villus) |
| Cavin3   | 19.009155 | 3.065477  | 1.43E-80  | 1.22E-77  | SM-3 (Villus) |
| Pdgfa    | 18.957657 | 4.2810426 | 3.82E-80  | 3.13E-77  | SM-3 (Villus) |
| Notch3   | 18.822992 | 4.1887817 | 4.89E-79  | 3.85E-76  | SM-3 (Villus) |
| Cav2     | 18.494095 | 6.7613964 | 2.30E-76  | 1.62E-73  | SM-3 (Villus) |
| Uba2     | 18.459137 | 3.4032235 | 4.40E-76  | 2.98E-73  | SM-3 (Villus) |
| Bcam     | 18.333843 | 5.584166  | 4.44E-75  | 2.82E-72  | SM-3 (Villus) |
| Cavin1   | 18.252016 | 3.2497687 | 1.99E-74  | 1.22E-71  | SM-3 (Villus) |
| Actn1    | 18.223846 | 3.2251806 | 3.34E-74  | 1.99E-71  | SM-3 (Villus) |
| Lgalsl   | 18.195965 | 4.377082  | 5.56E-74  | 3.21E-71  | SM-3 (Villus) |
| Tpm2     | 18.188145 | 2.9687235 | 6.41E-74  | 3.60E-71  | SM-3 (Villus) |
| Gm13889  | 18.140223 | 5.149919  | 1.53E-73  | 8.37E-71  | SM-3 (Villus) |
| Inpp4b   | 18.062143 | 6.368537  | 6.33E-73  | 3.36E-70  | SM-3 (Villus) |
| Lmod1    | 18.008503 | 4.9412885 | 1.67E-72  | 8.64E-70  | SM-3 (Villus) |
| Rgs7bp   | 17.946276 | 4.6663857 | 5.13E-72  | 2.59E-69  | SM-3 (Villus) |
| Col4a1   | 17.593493 | 2.930351  | 2.76E-69  | 1.36E-66  | SM-3 (Villus) |
| Dstn     | 17.544193 | 2.6952748 | 6.59E-69  | 3.16E-66  | SM-3 (Villus) |
| Parm1    | 17.499388 | 3.8028615 | 1.45E-68  | 6.78E-66  | SM-3 (Villus) |
| Crip2    | 17.450434 | 3.8212454 | 3.42E-68  | 1.56E-65  | SM-3 (Villus) |
| Map3k20  | 17.427467 | 4.542068  | 5.11E-68  | 2.28E-65  | SM-3 (Villus) |
| Pde3a    | 17.254097 | 3.4037647 | 1.04E-66  | 4.55E-64  | SM-3 (Villus) |
| Wtip     | 17.096083 | 3.3565717 | 1.59E-65  | 6.64E-63  | SM-3 (Villus) |
| Cryab    | 17.053783 | 4.171619  | 3.28E-65  | 1.34E-62  | SM-3 (Villus) |
| Mfge8    | 16.99911  | 3.361401  | 8.34E-65  | 3.34E-62  | SM-3 (Villus) |
| 7-Sep    | 16.830502 | 1.9385679 | 1.46E-63  | 5.62E-61  | SM-3 (Villus) |
| Ndufa4l2 | 16.746647 | 4.056599  | 5.99E-63  | 2.26E-60  | SM-3 (Villus) |
| Actn4    | 16.734217 | 2.721576  | 7.38E-63  | 2.74E-60  | SM-3 (Villus) |
| Actg2    | 16.615961 | 3.778279  | 5.34E-62  | 1.94E-59  | SM-3 (Villus) |
| Procr    | 16.416985 | 5.9100966 | 1.45E-60  | 5.07E-58  | SM-3 (Villus) |
| Zfhx3    | 16.402012 | 2.5723062 | 1.85E-60  | 6.38E-58  | SM-3 (Villus) |
| Col18a1  | 26.236198 | 7.0498924 | 1.03E-151 | 2.02E-147 | Pericytes     |
| Col4a1   | 26.044394 | 4.321435  | 1.56E-149 | 1.53E-145 | Pericytes     |
| Pdgfrb   | 25.45854  | 4.705067  | 5.68E-143 | 3.72E-139 | Pericytes     |
| Rgs5     | 25.248634 | 6.8217325 | 1.17E-140 | 5.76E-137 | Pericytes     |
| Col4a2   | 25.05333  | 3.9045007 | 1.61E-138 | 6.31E-135 | Pericytes     |
| Myh9     | 25.042831 | 4.501427  | 2.09E-138 | 6.84E-135 | Pericytes     |
| Igfbp7   | 24.393513 | 4.5150485 | 2.00E-131 | 4.38E-128 | Pericytes     |
| Gm13889  | 23.63744  | 5.964197  | 1.59E-123 | 3.12E-120 | Pericytes     |
| Mcam     | 23.326578 | 5.424364  | 2.38E-120 | 3.60E-117 | Pericytes     |
| 4-Sep    | 23.273073 | 6.351825  | 8.31E-120 | 1.17E-116 | Pericytes     |
| Ebf1     | 23.044256 | 3.8746367 | 1.68E-117 | 2.20E-114 | Pericytes     |
| Cygb     | 22.61001  | 4.2592506 | 3.45E-113 | 3.99E-110 | Pericytes     |
| Epas1    | 21.919008 | 6.292048  | 1.71E-106 | 1.77E-103 | Pericytes     |
| Rarres2  | 21.751703 | 3.0938501 | 6.66E-105 | 6.54E-102 | Pericytes     |

|           |           |            |           |           |           |
|-----------|-----------|------------|-----------|-----------|-----------|
| Rasgrp2   | 21.65907  | 4.283235   | 4.99E-104 | 4.67E-101 | Pericytes |
| Lamb1     | 21.585014 | 3.0144823  | 2.48E-103 | 2.22E-100 | Pericytes |
| Ifitm3    | 21.553246 | 2.2356727  | 4.94E-103 | 4.22E-100 | Pericytes |
| Itga1     | 21.548573 | 4.5623546  | 5.46E-103 | 4.47E-100 | Pericytes |
| Nid2      | 21.205221 | 3.6211898  | 8.55E-100 | 6.46E-97  | Pericytes |
| Gcnt2     | 21.178709 | 6.9073825  | 1.50E-99  | 1.09E-96  | Pericytes |
| Crip2     | 21.166977 | 3.9145317  | 1.93E-99  | 1.35E-96  | Pericytes |
| Cbfa2t3   | 20.428207 | 5.3083463  | 9.39E-93  | 6.15E-90  | Pericytes |
| Art3      | 20.412916 | 7.782628   | 1.28E-92  | 8.14E-90  | Pericytes |
| Fabp7     | 20.39438  | 5.5588684  | 1.88E-92  | 1.15E-89  | Pericytes |
| Notch3    | 20.297976 | 3.6590533  | 1.34E-91  | 7.98E-89  | Pericytes |
| Ndufa4l2  | 20.096212 | 4.0404286  | 7.96E-90  | 4.35E-87  | Pericytes |
| Phlda1    | 20.070345 | 4.2805786  | 1.34E-89  | 7.12E-87  | Pericytes |
| Tagln2    | 19.305065 | 3.2430224  | 4.87E-83  | 2.33E-80  | Pericytes |
| mt-Cytb   | 19.064531 | 0.96496373 | 4.98E-81  | 2.33E-78  | Pericytes |
| Tgfb2     | 18.851683 | 4.06647    | 2.85E-79  | 1.24E-76  | Pericytes |
| Gjc1      | 18.673065 | 2.6221154  | 8.20E-78  | 3.43E-75  | Pericytes |
| Abcc9     | 18.632103 | 3.1366665  | 1.76E-77  | 6.94E-75  | Pericytes |
| Igfbp3    | 18.484596 | 4.2006626  | 2.75E-76  | 1.06E-73  | Pericytes |
| Mfge8     | 18.328901 | 3.1374207  | 4.87E-75  | 1.80E-72  | Pericytes |
| Myo1b     | 18.19981  | 3.6366415  | 5.18E-74  | 1.85E-71  | Pericytes |
| Tns1      | 18.164825 | 3.0429611  | 9.80E-74  | 3.44E-71  | Pericytes |
| Tmem176a  | 18.161282 | 2.6232257  | 1.05E-73  | 3.60E-71  | Pericytes |
| Thbd      | 18.13528  | 4.9650655  | 1.68E-73  | 5.69E-71  | Pericytes |
| Ggt5      | 17.987276 | 5.162026   | 2.45E-72  | 8.16E-70  | Pericytes |
| Gucy1a1   | 17.738016 | 3.1058128  | 2.13E-70  | 6.87E-68  | Pericytes |
| Tpm4      | 17.678562 | 1.9609044  | 6.13E-70  | 1.94E-67  | Pericytes |
| Tmsb4x    | 17.649542 | 1.0184737  | 1.03E-69  | 3.20E-67  | Pericytes |
| Cspg4     | 17.387798 | 3.6634243  | 1.02E-67  | 3.09E-65  | Pericytes |
| Nid1      | 17.356855 | 2.357471   | 1.75E-67  | 5.21E-65  | Pericytes |
| Lama4     | 17.350592 | 3.1673887  | 1.95E-67  | 5.64E-65  | Pericytes |
| Id3       | 17.23514  | 2.0788634  | 1.45E-66  | 4.12E-64  | Pericytes |
| Serpinb1a | 17.217113 | 4.829537   | 1.98E-66  | 5.55E-64  | Pericytes |
| Lgmn      | 17.16792  | 3.7983334  | 4.62E-66  | 1.28E-63  | Pericytes |
| Gng11     | 17.040451 | 2.6999054  | 4.12E-65  | 1.09E-62  | Pericytes |
| mt-Nd4    | 16.860243 | 0.79953    | 8.82E-64  | 2.25E-61  | Pericytes |
